# Supplementary material
Source: Research Square preprint supplement (doi:10.21203/rs.3.rs-8770632/v1)

Figure S1

**A**

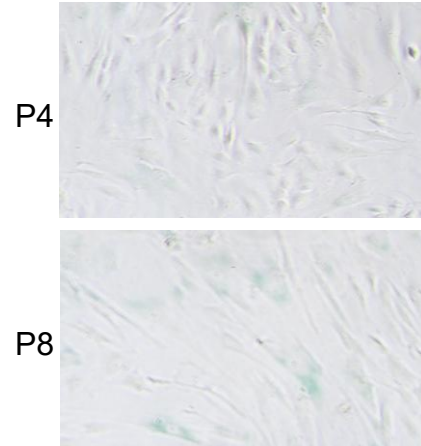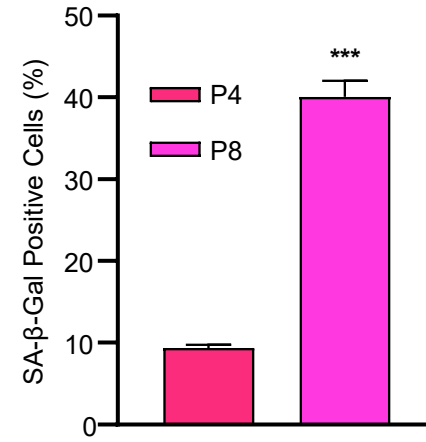

**B**

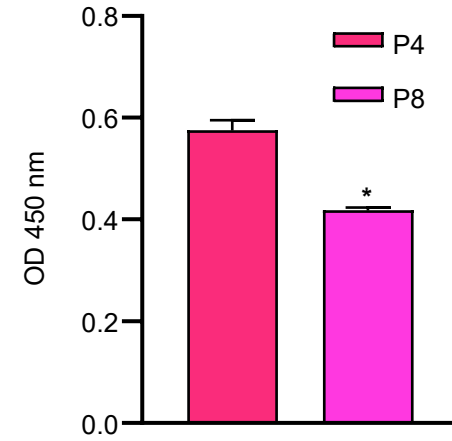

**C**

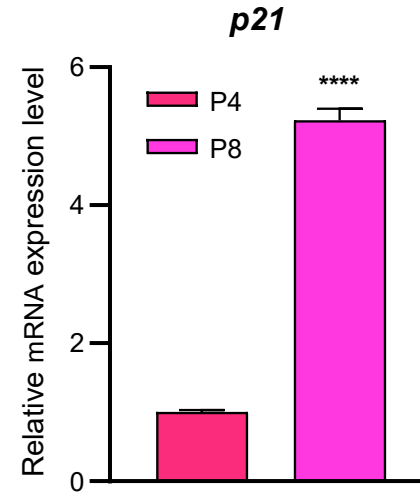

Figure S2

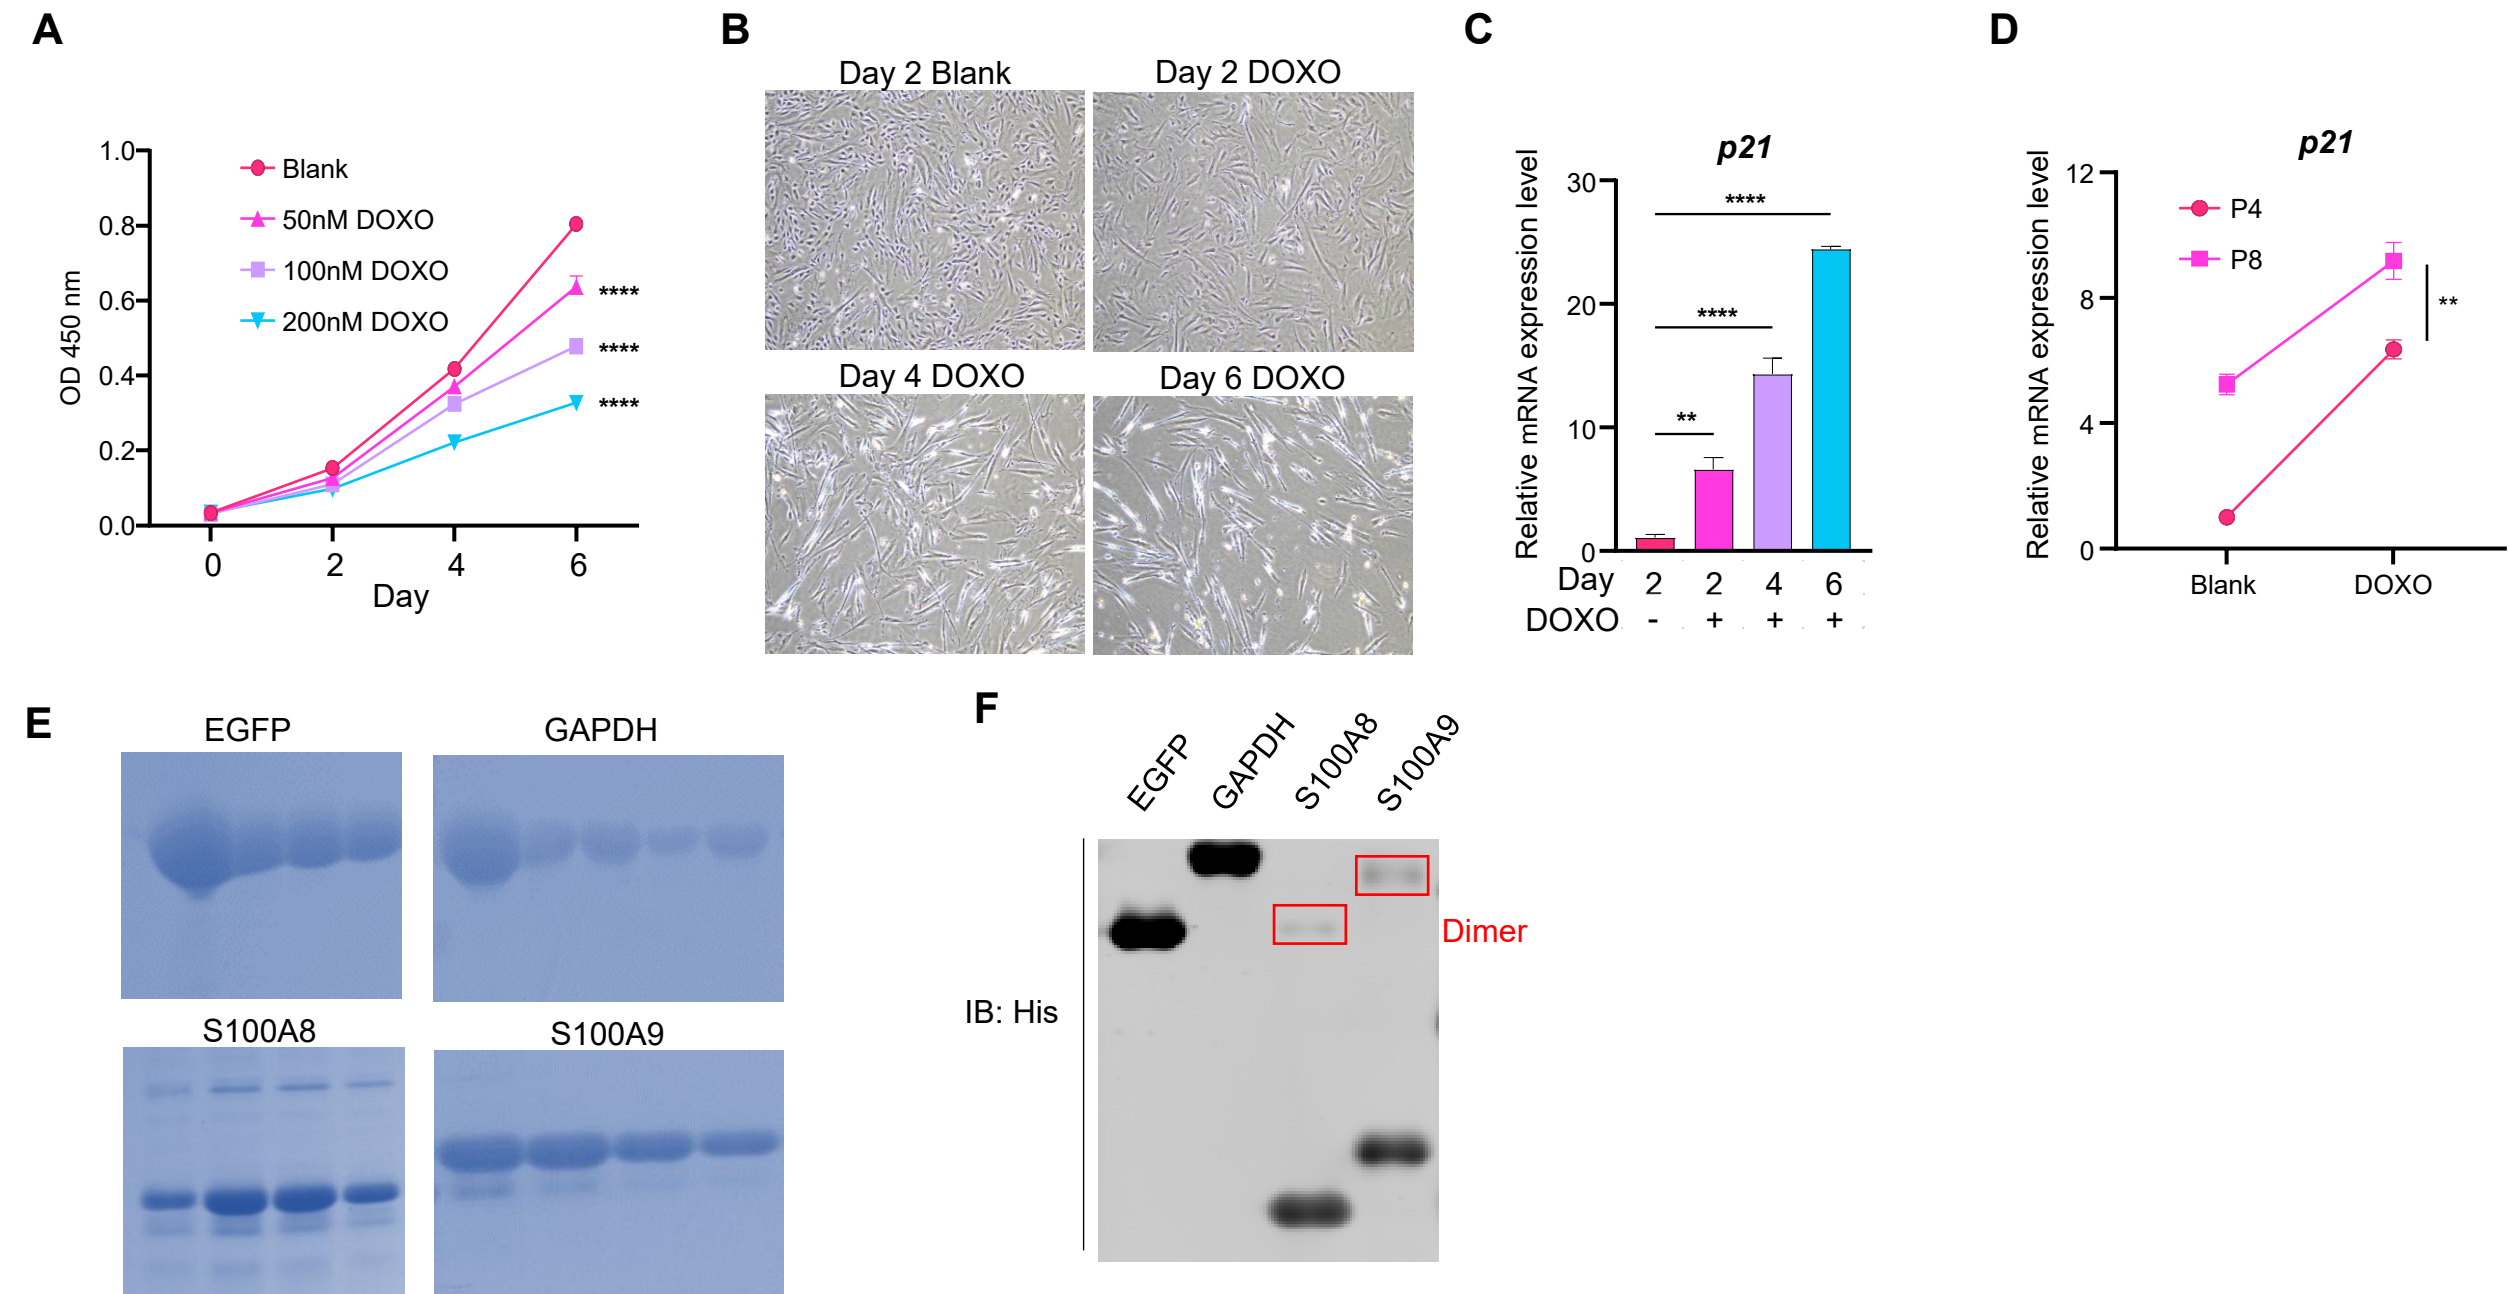

Figure S3

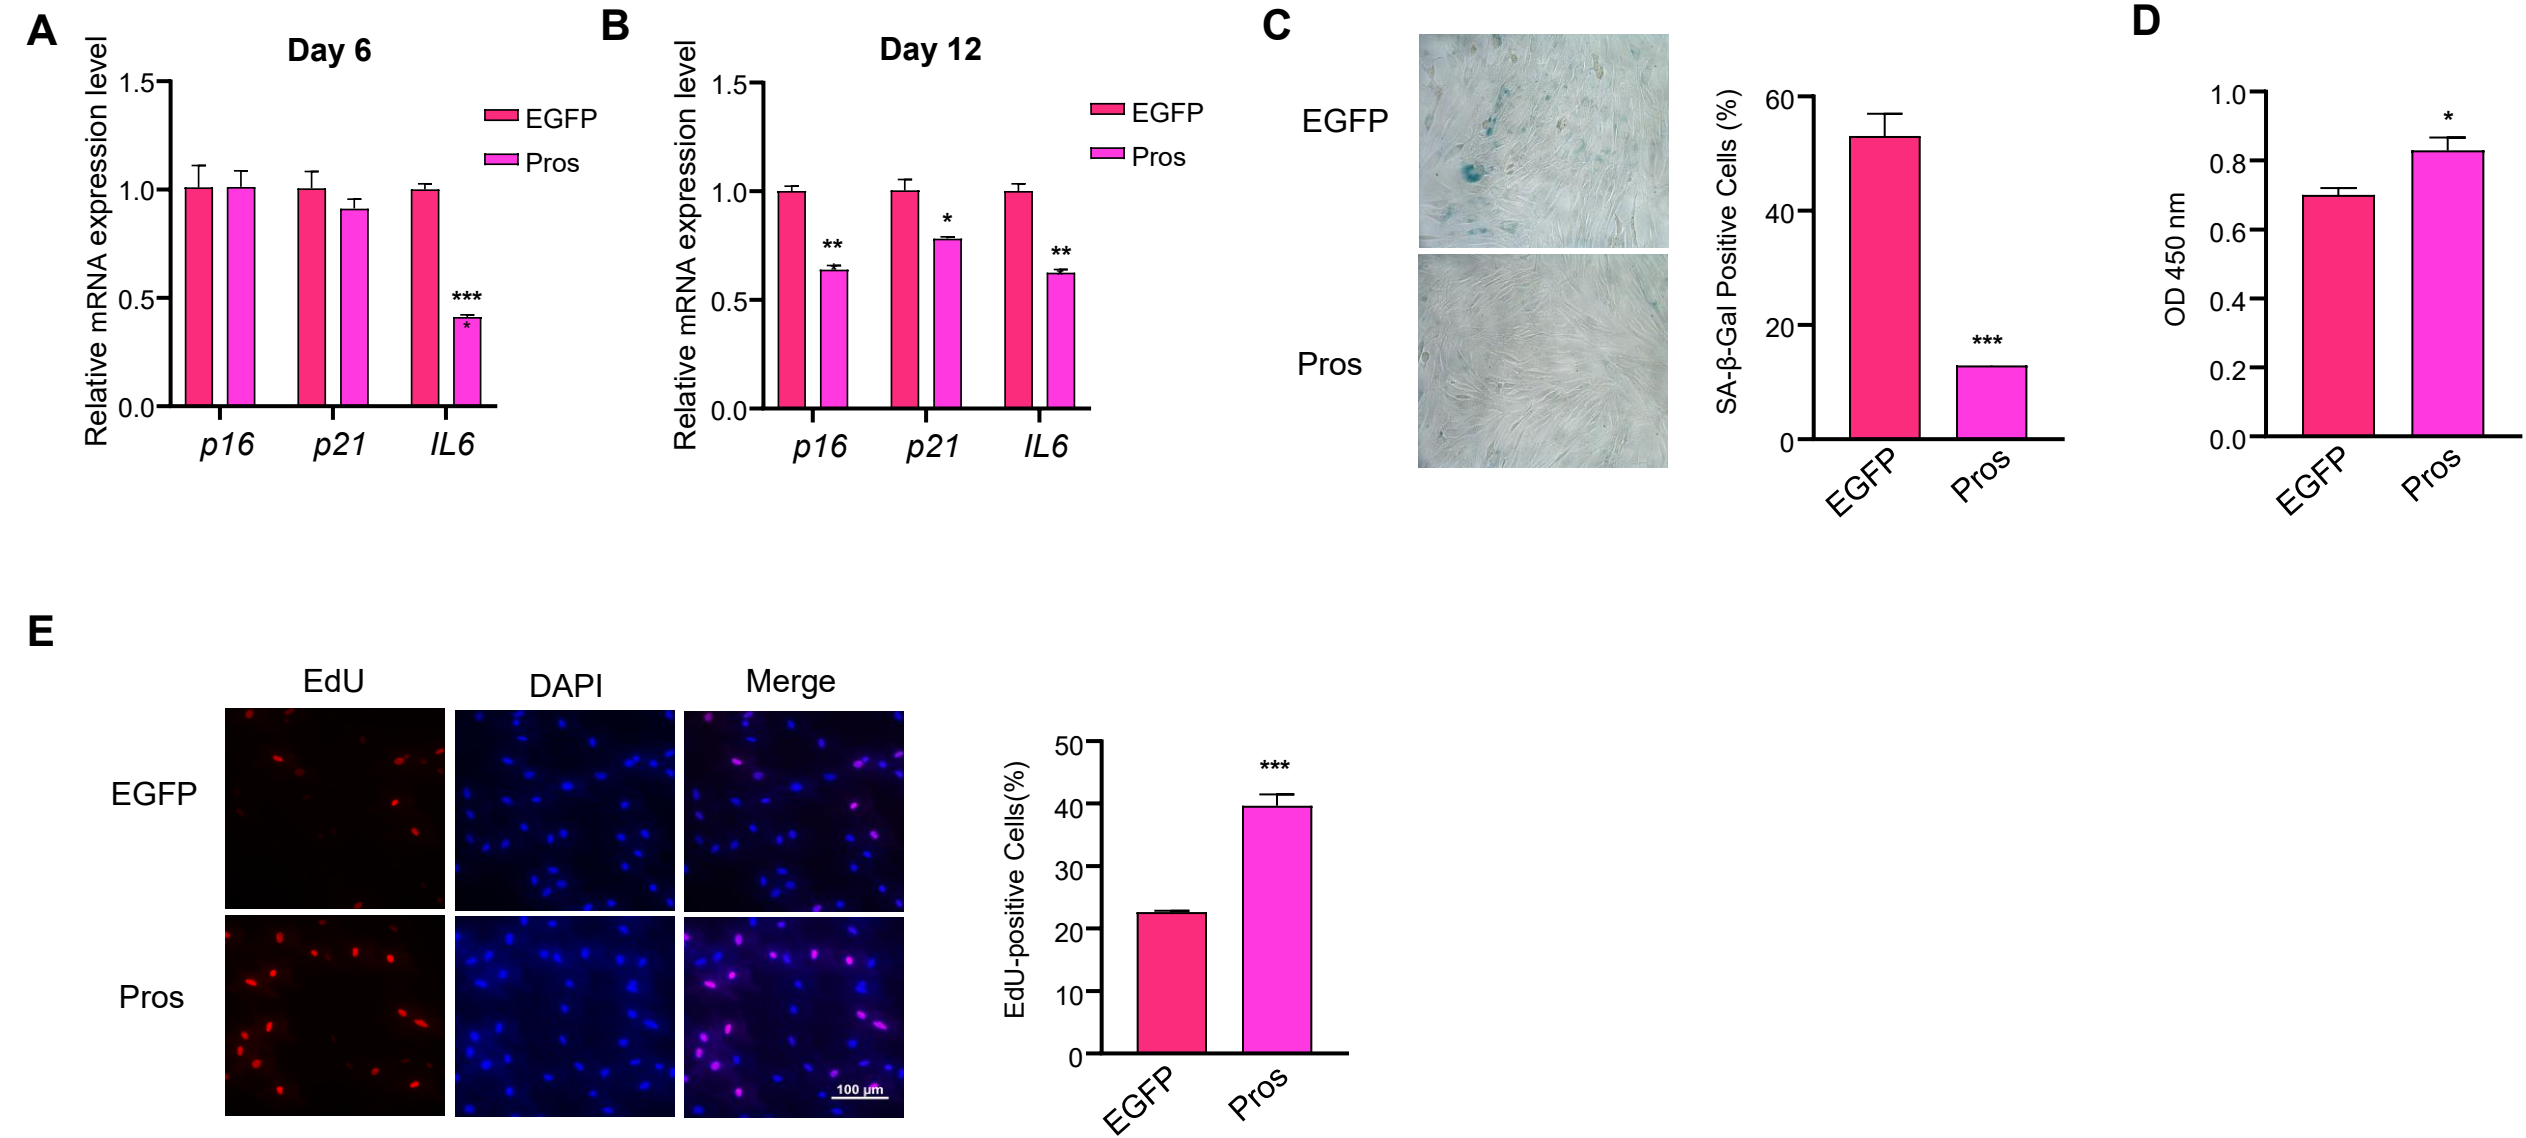

Figure S4

**hMSCs Pros vs Blank**

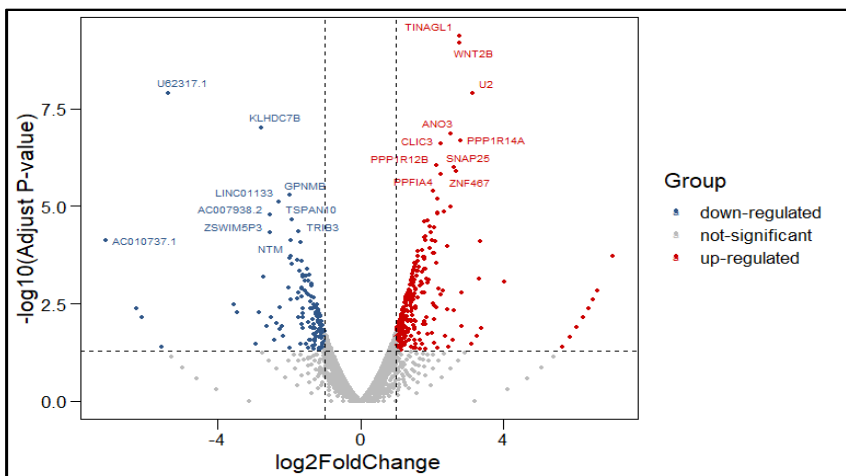

|                |                 |              |
|----------------|-----------------|--------------|
| Down-regulated | Not-significant | Up-regulated |
| 159            | 11323           | 305          |

**hMSC\_EGFP vs Blank**

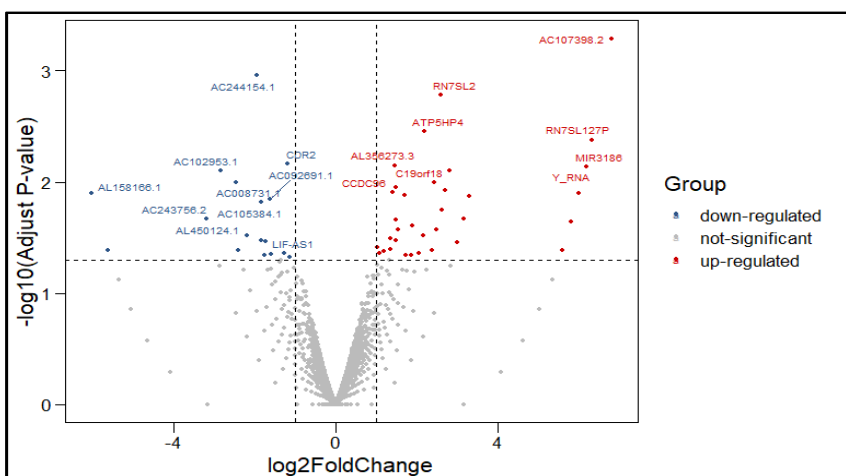

|                |                 |              |
|----------------|-----------------|--------------|
| Down-regulated | Not-significant | Up-regulated |
| 17             | 11612           | 50           |

**C**

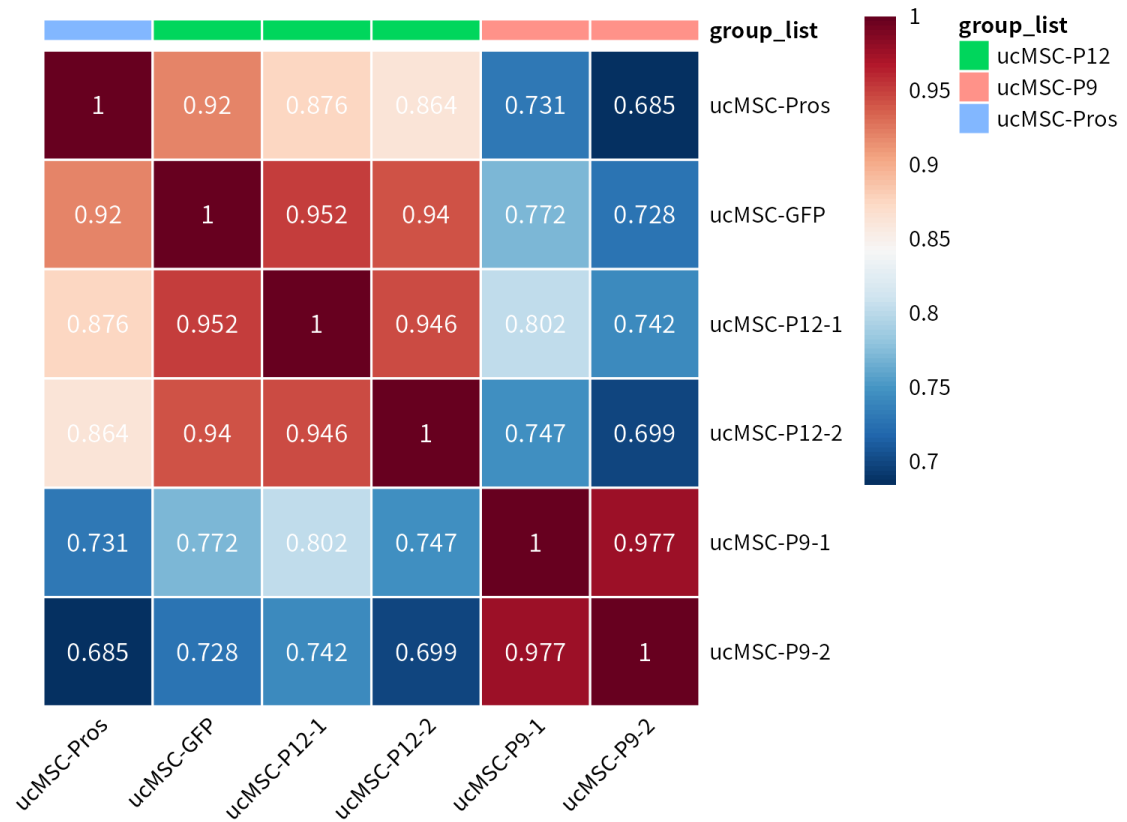

ucMSC-Pros  
ucMSC-GFP  
ucMSC-P12-1  
ucMSC-P12-2  
ucMSC-P9-1  
ucMSC-P9-2

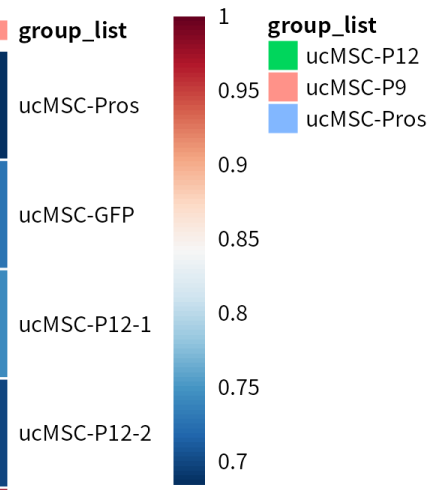

Supplement: Supplementary file 2 [file 7deef35463bc5d44d4eeacf7.pdf]
