# Supplementary material
Source: Research Square preprint supplement (doi:10.21203/rs.3.rs-8770632/v1)
Supplement: Supplementary file 2 [file b2ebd4cc2bdfc0fd60db54e1.xlsx]

## Sheet: Sheet1
Primers for RT-PCR
name	sequences
β-actin-F	GCTCCTCCTGAGCGCAAG
β-actin-R	CATCTGCTGGAAGGTGGACA
p16-F	AACGCACCGAATAGTTACGG
p16-R	ACCAGCGTGTCCAGGAAG
p21-F	CGAAGTCAGTTCCTTGTGGAG
p21-R	CATGGGTTCTGACGGACAT
p53-F	CAGCACATGACGGAGGTTGT
p53-R	TCATCCAAATACTCCACACGC
IL-6-F	ACTCACCTCTTCAGAACGAATTG
IL-6-R	CCATCTTTGGAAGGTTCAGGTTG
WNT2B-F	CGGGACCACACCGTCTTTG
WNT2B-R	GCGAGTAATAGCGTGGACTAC
ANO3-F	TCAGAACACGCTACTTATGACCG
ANO3-R	GAGGTCCACTGGATGCTATGTA
H19-F	ACTGCACTACCTGACTCAGGAAT
H19-R	AAGAGACAGAAGGATGAAAAAGA
PPP1R12B-F	AAACAAGAAAAGACCTCTGACCG
PPP1R12B-R	CAGCCTCTGGTTGTCGGATTT
PPP1R14A-F	GACATGCCCGATGAGATCAAC
PPP1R14A-R	CTCGACAGGTTTCCCACATGA
GPNMB-F	CCTCGTGGGCTCAAATATAACAT
GPNMB-R	ACTGTCCTCTGACCATGCTGT
AC007938.2-F	CTTCCAACCACACCCACAGA
AC007938.2-R	TGTCAATTTGGTCACAGTTGCT
SGCG-F	CTGCGCTTGGAAGGGGAAT
SGCG-R	CCATTTTGGGACCGACTTTTAAC
PSAT1-F	TGCCGCACTCAGTGTTGTTAG
PSAT1-R	GCAATTCCCGCACAAGATTCT
EPHA3-F	ACTCTACGAGACTGCAATAGCA
EPHA3-R	TCCCCAAGATCCATTTGAGTGA
