# Supplementary material
Source: Research Square preprint supplement (doi:10.21203/rs.3.rs-8770632/v1)
Supplement: Supplementary file 3 [file cc9b5dee01890e2927f896dd.xlsx]

## Sheet: MSC_ProsvsEGFP_GeneName.de
geneName	geneID	logFC	logCPM	PValue
WASH7P	ENSG00000227232	0.0385896	2.1939	0.967602
MIR6859-1	ENSG00000278267	2.21379	-1.15876	0.0947168
AL627309.8	ENSG00000269981	2.55282	-1.60806	0.150691
FO538757.1	ENSG00000279457	-0.116337	3.28202	0.807768
MTND1P23	ENSG00000225972	0.113589	-0.902997	1
MTND2P28	ENSG00000225630	-0.304349	5.49617	0.469149
MTCO1P12	ENSG00000237973	0.199559	3.63057	0.652013
MTATP6P1	ENSG00000248527	0.206275	9.00837	0.615916
MTCO3P12	ENSG00000198744	0.748833	0.577982	0.240754
LINC01128	ENSG00000228794	-0.781956	3.49034	0.0818166
AL645608.7	ENSG00000272438	0.59472	-0.261907	0.515477
AL645608.3	ENSG00000230699	0.320495	2.47859	0.518563
AL645608.1	ENSG00000223764	0.180141	4.00667	0.688174
SAMD11	ENSG00000187634	0.295898	4.72169	0.489693
NOC2L	ENSG00000188976	-0.564615	6.34603	0.174679
KLHL17	ENSG00000187961	0.0995957	4.43223	0.821255
AL645608.8	ENSG00000272512	0.325912	3.1896	0.463299
HES4	ENSG00000188290	-0.00425978	4.11132	1
ISG15	ENSG00000187608	0.169715	4.48048	0.695139
AGRN	ENSG00000188157	0.236044	8.78872	0.566088
C1orf159	ENSG00000131591	0.178093	3.64055	0.689294
SDF4	ENSG00000078808	-0.163165	8.2232	0.692056
B3GALT6	ENSG00000176022	-0.374868	5.2151	0.373397
C1QTNF12	ENSG00000184163	0.0879259	1.69595	0.912189
UBE2J2	ENSG00000160087	-0.128377	5.58223	0.75954
LINC01786	ENSG00000230415	-0.261462	0.567703	0.750869
SCNN1D	ENSG00000162572	0.345375	3.40839	0.444248
ACAP3	ENSG00000131584	-0.326237	6.33746	0.432565
PUSL1	ENSG00000169972	-0.237875	3.61572	0.590654
INTS11	ENSG00000127054	-0.0193993	6.52651	0.96438
AL139287.1	ENSG00000240731	-0.0513878	1.89155	0.96072
CPTP	ENSG00000224051	-0.0380802	4.41364	0.939169
DVL1	ENSG00000107404	0.121978	6.07548	0.77097
MXRA8	ENSG00000162576	-0.403025	8.46364	0.327832
AURKAIP1	ENSG00000175756	-0.0715969	5.47684	0.867619
CCNL2	ENSG00000221978	-0.115144	8.10553	0.780082
AL391244.1	ENSG00000224870	0.0392391	3.50465	0.930304
MRPL20	ENSG00000242485	-0.345467	5.00074	0.414497
VWA1	ENSG00000179403	0.533126	4.23564	0.212794
ATAD3B	ENSG00000160072	-0.788109	5.03849	0.0626279
ATAD3A	ENSG00000197785	-0.525607	4.89672	0.214579
TMEM240	ENSG00000205090	0.460922	2.04198	0.371336
SSU72	ENSG00000160075	-0.0457176	6.25989	0.914247
FNDC10	ENSG00000228594	-1.25742	2.66199	0.00851457
AL691432.2	ENSG00000272106	-0.856623	1.40743	0.110124
MIB2	ENSG00000197530	0.169009	6.59431	0.68421
CDK11B	ENSG00000248333	-0.188456	5.20133	0.658484
SLC35E2B	ENSG00000189339	0.29065	6.51015	0.483829
AL691432.1	ENSG00000269737	-0.488824	2.43447	0.308613
AL031282.1	ENSG00000227775	0.521555	1.72831	0.326171
NADK	ENSG00000008130	-0.0376975	5.59112	0.931696
GNB1	ENSG00000078369	0.0993121	8.52586	0.809484
PRKCZ-AS1	ENSG00000182873	-0.455025	1.50539	0.422127
FAAP20	ENSG00000162585	0.0307824	5.3773	0.944688
SKI	ENSG00000157933	0.193483	7.20939	0.63988
RER1	ENSG00000157916	-0.19932	6.59325	0.631264
PEX10	ENSG00000157911	-0.194046	3.99172	0.666409
MEGF6	ENSG00000162591	1.22945	7.14909	0.0033061
MIR551A	ENSG00000207776	4.14303	-2.4859	0.509804
TPRG1L	ENSG00000158109	-0.400256	5.94388	0.337222
WRAP73	ENSG00000116213	-0.0300504	4.3311	0.951742
TP73-AS1	ENSG00000227372	0.591529	5.3031	0.159497
SMIM1	ENSG00000235169	1.32156	1.72566	0.0122623
LRRC47	ENSG00000130764	0.206732	5.59144	0.621924
RN7SL574P	ENSG00000266075	5.6725	-1.74433	0.0409646
AL365330.1	ENSG00000272153	0.0647062	0.857991	1
CEP104	ENSG00000116198	0.0974792	5.05639	0.819437
DFFB	ENSG00000169598	-0.285454	2.88748	0.529128
C1orf174	ENSG00000198912	0.0810872	3.91101	0.86204
NPHP4	ENSG00000131697	-0.0302197	3.88886	0.956788
KCNAB2	ENSG00000069424	0.404288	3.82569	0.356747
RPL22	ENSG00000116251	0.0904589	7.57847	0.826944
RNF207	ENSG00000158286	0.290192	5.92585	0.486973
ICMT	ENSG00000116237	-0.0888672	6.29491	0.832116
GPR153	ENSG00000158292	0.673194	4.99187	0.111217
ACOT7	ENSG00000097021	-0.170122	5.02391	0.690663
TNFRSF25	ENSG00000215788	0.660788	3.58215	0.135531
PLEKHG5	ENSG00000171680	1.03673	5.36275	0.0142163
NOL9	ENSG00000162408	-0.395664	3.76485	0.367639
ZBTB48	ENSG00000204859	0.0504059	3.86702	0.912353
KLHL21	ENSG00000162413	-0.32553	6.1229	0.434479
PHF13	ENSG00000116273	0.303739	5.18149	0.474132
THAP3	ENSG00000041988	0.510521	2.96311	0.270884
DNAJC11	ENSG00000007923	-0.280576	5.21689	0.505814
CAMTA1	ENSG00000171735	0.055144	3.51997	0.903498
VAMP3	ENSG00000049245	0.201012	6.73865	0.627929
Z98884.2	ENSG00000269925	-1.03236	-0.990558	0.323452
PER3	ENSG00000049246	1.1408	4.35861	0.00841975
PARK7	ENSG00000116288	-0.199514	6.89592	0.630145
Y_RNA	ENSG00000200344	0.666302	-1.90214	1
ERRFI1	ENSG00000116285	-0.0177414	4.795	0.970605
RERE	ENSG00000142599	-0.104735	7.09468	0.800698
ENO1	ENSG00000074800	-0.574127	10.1071	0.163237
GPR157	ENSG00000180758	0.329882	2.41561	0.501732
MIR34AHG	ENSG00000228526	-0.0223481	4.13067	0.963171
LINC01759	ENSG00000234546	0.229195	2.21549	0.658442
H6PD	ENSG00000049239	0.699283	7.41974	0.09133
SPSB1	ENSG00000171621	-0.0786684	5.79996	0.852791
SLC25A33	ENSG00000171612	-1.28671	2.81923	0.00630594
AL954705.1	ENSG00000231181	-1.95764	-0.760561	0.0439913
TMEM201	ENSG00000188807	-0.668542	3.64938	0.126223
PIK3CD	ENSG00000171608	0.465007	4.95916	0.271075
PIK3CD-AS2	ENSG00000231789	0.289603	1.05929	0.687552
CLSTN1	ENSG00000171603	0.119398	8.67374	0.771766
CTNNBIP1	ENSG00000178585	0.187568	4.17081	0.661094
LZIC	ENSG00000162441	-0.0684645	3.61178	0.896155
NMNAT1	ENSG00000173614	-0.0922423	3.06448	0.851625
UBE4B	ENSG00000130939	0.18094	6.30404	0.664029
KIF1B	ENSG00000054523	0.168724	5.8254	0.685309
PGD	ENSG00000142657	-0.20653	8.01087	0.616281
DFFA	ENSG00000160049	0.25326	5.49559	0.548467
PEX14	ENSG00000142655	-0.119247	4.41211	0.781692
TARDBP	ENSG00000120948	-0.291161	5.77104	0.484835
AL109811.3	ENSG00000271895	-0.146749	0.807528	0.853182
SRM	ENSG00000116649	-0.41463	6.6586	0.317395
EXOSC10	ENSG00000171824	-0.113184	5.50646	0.788874
MTOR	ENSG00000198793	-0.0163162	6.31098	0.970655
UBIAD1	ENSG00000120942	-0.795462	3.61301	0.0713164
FBXO2	ENSG00000116661	0.994206	3.8541	0.0233891
FBXO44	ENSG00000132879	0.0901685	4.76113	0.83857
FBXO6	ENSG00000116663	0.0547898	2.52732	0.921266
MAD2L2	ENSG00000116670	-0.0609123	4.42522	0.894605
AGTRAP	ENSG00000177674	-0.0592196	5.04302	0.89101
MTHFR	ENSG00000177000	0.419714	4.83539	0.323276
CLCN6	ENSG00000011021	-0.140918	5.67029	0.739179
NPPA-AS1	ENSG00000242349	-3.15597	0.116695	0.000154712
NPPB	ENSG00000120937	1.10138	-0.422647	0.211733
RNU5E-4P	ENSG00000201801	4.70051	-2.26229	0.264706
KIAA2013	ENSG00000116685	-0.260501	5.92706	0.532837
PLOD1	ENSG00000083444	0.151452	9.23831	0.712558
MFN2	ENSG00000116688	-0.112493	6.70361	0.786914
MIIP	ENSG00000116691	-0.386438	4.33506	0.374217
Y_RNA	ENSG00000202461	1.3809	-1.61033	0.483528
TNFRSF1B	ENSG00000028137	1.40252	2.88549	0.0025819
VPS13D	ENSG00000048707	0.888052	6.37457	0.0333952
SNORA59A	ENSG00000239149	-1.15928	-1.61713	0.483528
DHRS3	ENSG00000162496	0.503206	8.38577	0.222228
RNU6ATAC18P	ENSG00000221340	1.34155	1.45127	0.0147643
MIR6730	ENSG00000276830	-0.45763	-1.26784	0.775535
AC254633.1	ENSG00000272482	1.81332	4.07568	4.92879e-05
PDPN	ENSG00000162493	-1.658	3.55092	0.000265037
PRDM2	ENSG00000116731	0.240388	5.69525	0.565041
KAZN	ENSG00000189337	0.303957	4.46364	0.476318
TMEM51	ENSG00000171729	-0.162074	2.91245	0.738262
EFHD2	ENSG00000142634	0.0310444	5.97698	0.942957
CASP9	ENSG00000132906	-0.308355	3.04017	0.506124
DNAJC16	ENSG00000116138	-0.237582	4.55139	0.577493
AGMAT	ENSG00000116771	-0.357261	1.41367	0.557621
DDI2	ENSG00000197312	0.160128	5.1219	0.705344
PLEKHM2	ENSG00000116786	0.0599755	7.00085	0.885671
SLC25A34	ENSG00000162461	0.490614	1.74084	0.357832
FBLIM1	ENSG00000162458	0.0981999	8.20838	0.811781
SPEN	ENSG00000065526	0.0303736	6.65419	0.943022
ZBTB17	ENSG00000116809	-0.452084	4.75561	0.286592
HSPB7	ENSG00000173641	1.44204	4.61566	0.000892502
FAM131C	ENSG00000185519	0.928519	0.891096	0.12588
EPHA2	ENSG00000142627	0.0975191	6.83233	0.814659
ARHGEF19	ENSG00000142632	0.453479	4.92387	0.283099
RSG1	ENSG00000132881	-0.290872	1.71683	0.586754
FBXO42	ENSG00000037637	0.282248	4.66829	0.509047
SZRD1	ENSG00000055070	-0.138453	6.69197	0.739054
NECAP2	ENSG00000157191	0.25819	5.97461	0.536203
CROCCP3	ENSG00000080947	-0.109994	3.01738	0.828248
NBPF1	ENSG00000219481	-0.104651	5.46268	0.804225
CROCCP2	ENSG00000215908	-0.26311	4.71106	0.541998
MST1P2	ENSG00000186301	0.247498	1.75024	0.668754
CROCC	ENSG00000058453	-0.0698876	5.33349	0.870176
MFAP2	ENSG00000117122	-0.221475	6.85104	0.59299
ATP13A2	ENSG00000159363	-0.370045	5.66166	0.3761
SDHB	ENSG00000117118	-0.146994	5.30846	0.731434
ARHGEF10L	ENSG00000074964	0.205355	4.75062	0.632018
ALDH4A1	ENSG00000159423	0.0582506	3.76363	0.90613
IFFO2	ENSG00000169991	1.46708	4.94711	0.000664916
UBR4	ENSG00000127481	0.359638	9.06047	0.381999
EMC1	ENSG00000127463	0.0467011	7.05834	0.911067
MRTO4	ENSG00000053372	-0.543491	4.47099	0.204931
AL035413.2	ENSG00000270728	0.825995	0.291554	0.211032
AKR7A2	ENSG00000053371	0.0102274	5.2305	0.98251
RNU6-1099P	ENSG00000200403	-4.03421	-2.49093	0.509804
PQLC2	ENSG00000040487	-0.554941	4.38587	0.195514
CAPZB	ENSG00000077549	0.144511	8.09525	0.725894
NBL1	ENSG00000158747	-0.206062	2.64422	0.669069
TMCO4	ENSG00000162542	0.204751	3.54491	0.657693
OTUD3	ENSG00000169914	0.18011	4.12217	0.684472
CAMK2N1	ENSG00000162545	-0.00445855	4.04797	1
MUL1	ENSG00000090432	-0.333606	4.86854	0.430944
PINK1	ENSG00000158828	0.586355	5.54701	0.16154
PINK1-AS	ENSG00000117242	-0.343529	3.18734	0.448776
DDOST	ENSG00000244038	-0.0261471	8.85405	0.949607
KIF17	ENSG00000117245	0.874207	2.02686	0.0817372
SH2D5	ENSG00000189410	-0.613268	2.65803	0.187655
HP1BP3	ENSG00000127483	0.0561961	7.20318	0.892663
EIF4G3	ENSG00000075151	0.267606	7.23075	0.517316
MIR1256	ENSG00000221808	-4.03421	-2.49093	0.509804
ECE1	ENSG00000117298	0.328948	7.8437	0.425004
NBPF2P	ENSG00000227001	-0.0855199	0.480259	1
NBPF3	ENSG00000142794	0.277288	4.71152	0.516776
USP48	ENSG00000090686	0.181341	6.24637	0.663523
LDLRAD2	ENSG00000187942	0.985409	2.71724	0.0345031
HSPG2	ENSG00000142798	1.24575	11.0968	0.00277625
LINC00339	ENSG00000218510	0.68135	2.04522	0.177629
CDC42	ENSG00000070831	-0.115763	7.47857	0.779561
ZBTB40	ENSG00000184677	-0.421285	5.56405	0.315329
ZBTB40-IT1	ENSG00000237200	-2.07985	-1.75589	0.245788
EPHB2	ENSG00000133216	1.55208	5.61979	0.000283653
KDM1A	ENSG00000004487	0.108753	6.45565	0.794414
LUZP1	ENSG00000169641	0.164544	6.51379	0.692375
ID3	ENSG00000117318	-0.789134	2.76544	0.089061
RPL11	ENSG00000142676	0.0225411	8.30011	0.956794
ELOA	ENSG00000011007	-0.347945	5.53358	0.408071
PITHD1	ENSG00000057757	0.194779	4.51705	0.649588
LYPLA2	ENSG00000011009	-0.0745629	5.23	0.86076
GALE	ENSG00000117308	0.0490645	4.37453	0.914225
HMGCL	ENSG00000117305	0.475034	4.86038	0.262147
FUCA1	ENSG00000179163	0.0271341	3.96594	0.958849
PNRC2	ENSG00000189266	-0.28903	5.44057	0.493115
SRSF10	ENSG00000188529	-0.360395	6.34154	0.385901
NIPAL3	ENSG00000001461	0.562886	5.87482	0.177318
SRRM1	ENSG00000133226	0.252247	6.27744	0.544366
CLIC4	ENSG00000169504	0.204126	9.0535	0.619574
SYF2	ENSG00000117614	-0.069871	4.93641	0.872426
RSRP1	ENSG00000117616	0.259866	5.48712	0.536919
SDHDP6	ENSG00000224183	0.281392	-0.67957	1
TMEM50A	ENSG00000183726	-0.238686	6.20493	0.566616
TMEM57	ENSG00000204178	-0.133011	5.08383	0.752697
LDLRAP1	ENSG00000157978	0.0950405	5.64947	0.82411
AL606491.1	ENSG00000225643	2.36389	-1.06472	0.0623388
SELENON	ENSG00000162430	0.387505	7.41851	0.348138
MTFR1L	ENSG00000117640	-0.129542	5.43081	0.759534
PAQR7	ENSG00000182749	0.230988	4.04454	0.599199
STMN1	ENSG00000117632	-0.171341	5.48066	0.684257
PAFAH2	ENSG00000158006	-0.699227	1.9498	0.166457
EXTL1	ENSG00000158008	0.743823	2.05656	0.139881
CEP85	ENSG00000130695	0.449331	3.2787	0.316745
SH3BGRL3	ENSG00000142669	-0.0793973	7.7339	0.847796
UBXN11	ENSG00000158062	-0.215661	3.6196	0.62574
DHDDS	ENSG00000117682	-0.0347416	5.63579	0.937055
HMGN2	ENSG00000198830	-0.336664	6.99871	0.415874
ARID1A	ENSG00000117713	0.257455	6.9171	0.534051
PIGV	ENSG00000060642	0.182172	4.07711	0.67534
ZDHHC18	ENSG00000204160	-0.109092	5.31458	0.79579
GPN2	ENSG00000142751	0.0615844	4.48227	0.891337
GPATCH3	ENSG00000198746	-0.0258379	3.38139	0.969758
NUDC	ENSG00000090273	-0.485355	6.10136	0.244034
TRNP1	ENSG00000253368	0.157023	4.75766	0.710865
FAM46B	ENSG00000158246	-0.519423	2.32781	0.292885
SLC9A1	ENSG00000090020	-0.579865	6.0232	0.163687
WDTC1	ENSG00000142784	0.264529	6.0941	0.525652
Y_RNA	ENSG00000252098	-4.58952	-2.26966	0.264706
TMEM222	ENSG00000186501	-0.556534	4.96176	0.188948
RNU6-48P	ENSG00000206888	1.02335	-2.26475	1
ACTG1P20	ENSG00000241547	-0.124096	-0.267009	1
MAP3K6	ENSG00000142733	0.228464	5.22671	0.585981
GPR3	ENSG00000181773	-0.430156	1.00893	0.457372
WASF2	ENSG00000158195	0.14505	6.8675	0.726625
AHDC1	ENSG00000126705	-0.0846254	5.35009	0.843787
IFI6	ENSG00000126709	0.856676	5.24765	0.042382
FAM76A	ENSG00000009780	0.0179834	2.64792	1
STX12	ENSG00000117758	0.107513	5.99472	0.79803
PPP1R8	ENSG00000117751	-0.428301	4.92541	0.312207
THEMIS2	ENSG00000130775	0.693572	2.5888	0.141562
RPA2	ENSG00000117748	-0.339384	3.71804	0.446363
XKR8	ENSG00000158156	0.309721	3.83908	0.481808
EYA3	ENSG00000158161	-0.132519	4.2572	0.766443
SPCS2P4	ENSG00000228589	-0.874581	-0.272108	0.30031
DNAJC8	ENSG00000126698	-0.344397	6.22699	0.407824
PHACTR4	ENSG00000204138	-0.181957	4.79649	0.66909
RCC1	ENSG00000180198	0.220633	4.96418	0.603182
SNHG3	ENSG00000242125	0.369039	4.73768	0.384986
SNORA73B	ENSG00000200087	2.06877	-0.816136	0.0637647
TRNAU1AP	ENSG00000180098	0.424806	3.46157	0.347526
SNHG12	ENSG00000197989	0.540095	2.9413	0.24258
SNORD99	ENSG00000221539	2.29543	-1.74665	0.245788
TAF12	ENSG00000120656	0.0310239	4.03038	0.950826
RAB42	ENSG00000188060	0.649962	2.37138	0.174203
GMEB1	ENSG00000162419	-0.372154	3.51235	0.411736
YTHDF2	ENSG00000198492	-0.258092	6.09014	0.53588
EPB41	ENSG00000159023	0.555612	5.14173	0.186415
TMEM200B	ENSG00000253304	0.290122	4.11927	0.499346
SRSF4	ENSG00000116350	-0.122555	6.59387	0.768491
MECR	ENSG00000116353	0.0594068	4.07991	0.904986
PTPRU	ENSG00000060656	0.1169	6.051	0.780429
SDC3	ENSG00000162512	0.0648593	7.72365	0.875549
PUM1	ENSG00000134644	0.170868	6.74648	0.680525
SNRNP40	ENSG00000060688	-0.377301	4.53414	0.377031
ZCCHC17	ENSG00000121766	-0.129579	4.5787	0.765124
FABP3	ENSG00000121769	0.481	1.4407	0.364985
SERINC2	ENSG00000168528	0.661417	3.7099	0.133736
AC114488.1	ENSG00000229167	6.65828	-1.06057	0.00143701
TINAGL1	ENSG00000142910	2.64294	6.4567	2.10074e-09
PEF1	ENSG00000162517	-0.0983804	5.79188	0.814026
AC114488.2	ENSG00000235790	-0.271027	2.44574	0.577632
COL16A1	ENSG00000084636	-0.199761	9.26107	0.626986
ADGRB2	ENSG00000121753	1.18458	5.42322	0.00524493
MIR4254	ENSG00000266580	-0.846468	-1.75359	0.704873
AL354919.2	ENSG00000254545	-0.22013	0.478929	0.824055
SPOCD1	ENSG00000134668	0.514831	7.22669	0.213304
PTP4A2	ENSG00000184007	0.0369226	7.87963	0.929186
KHDRBS1	ENSG00000121774	-0.0121808	6.76548	0.978
TMEM39B	ENSG00000121775	-0.501145	3.33139	0.269644
KPNA6	ENSG00000025800	0.117903	6.22461	0.778033
TXLNA	ENSG00000084652	-0.113811	6.8435	0.784181
CCDC28B	ENSG00000160050	0.123938	3.36751	0.78841
TMEM234	ENSG00000160055	0.0211879	3.68179	0.975127
EIF3I	ENSG00000084623	-0.0423385	7.43669	0.919086
MTMR9LP	ENSG00000220785	0.320371	4.00926	0.459245
FAM167B	ENSG00000183615	0.237839	1.54448	0.671869
HDAC1	ENSG00000116478	-0.00960833	6.19721	0.983764
MARCKSL1	ENSG00000175130	-0.403701	6.57728	0.330567
FAM229A	ENSG00000225828	-0.0542094	2.05498	0.964721
BSDC1	ENSG00000160058	-0.0071926	6.26511	0.988307
ZBTB8OS	ENSG00000176261	0.0552741	3.33264	0.906423
RBBP4	ENSG00000162521	-0.29713	6.45888	0.474346
SYNC	ENSG00000162520	0.577447	5.35864	0.169379
KIAA1522	ENSG00000162522	0.87651	5.03311	0.0386279
YARS	ENSG00000134684	-0.229901	7.83541	0.577148
S100PBP	ENSG00000116497	0.410838	5.45116	0.3269
TMEM54	ENSG00000121900	0.225998	4.17153	0.605532
RNF19B	ENSG00000116514	-0.423137	4.02467	0.331178
AK2	ENSG00000004455	-0.21999	6.27314	0.597253
AZIN2	ENSG00000142920	0.693766	3.52001	0.118633
TRIM62	ENSG00000116525	0.0573445	4.02824	0.901662
ZNF362	ENSG00000160094	-0.179254	5.26735	0.672662
AL513327.3	ENSG00000270115	0.945688	-0.899008	0.480955
AL513327.1	ENSG00000225313	0.444649	2.3514	0.355977
PHC2	ENSG00000134686	0.176475	7.23978	0.669586
MIR3605	ENSG00000284154	0.110994	-1.75128	1
RN7SKP16	ENSG00000222112	-0.274826	0.28156	0.804319
ZSCAN20	ENSG00000121903	0.332364	2.39943	0.497354
CSMD2	ENSG00000121904	-0.23526	4.36919	0.588625
SMIM12	ENSG00000163866	-0.485553	4.44689	0.256132
AL122010.1	ENSG00000230163	-0.0445392	0.248044	1
AC114490.1	ENSG00000241014	0.898198	2.71591	0.056708
ZMYM6	ENSG00000163867	0.0447602	3.29363	0.935748
ZMYM1	ENSG00000197056	0.290021	3.45526	0.514281
SFPQ	ENSG00000116560	-0.302542	8.3857	0.462473
ZMYM4	ENSG00000146463	0.168151	6.20304	0.686925
KIAA0319L	ENSG00000142687	0.457196	6.30344	0.271514
NCDN	ENSG00000020129	-0.370302	5.75381	0.376174
PSMB2	ENSG00000126067	-0.13146	5.8854	0.75428
C1orf216	ENSG00000142686	-0.294301	4.6352	0.494409
AGO4	ENSG00000134698	-0.107252	4.71564	0.809426
AGO1	ENSG00000092847	0.100333	5.49453	0.811896
AGO3	ENSG00000126070	0.368946	4.81008	0.383616
ADPRHL2	ENSG00000116863	0.182326	4.541	0.674029
COL8A2	ENSG00000171812	0.95951	6.21632	0.0218173
TRAPPC3	ENSG00000054116	-0.397408	5.60884	0.343199
MAP7D1	ENSG00000116871	-0.176539	7.45684	0.669138
THRAP3	ENSG00000054118	-0.08119	6.92139	0.845371
SH3D21	ENSG00000214193	1.00696	3.35745	0.0242226
EVA1B	ENSG00000142694	0.0903855	5.57754	0.832132
AL591845.1	ENSG00000116883	0.951419	2.01726	0.0579672
STK40	ENSG00000196182	-0.418523	5.36659	0.317854
LSM10	ENSG00000181817	-0.0951098	4.10466	0.832651
OSCP1	ENSG00000116885	-0.522783	2.0168	0.293774
MRPS15	ENSG00000116898	-0.172073	4.87451	0.685259
LINC01137	ENSG00000233621	0.269429	2.00738	0.617156
ZC3H12A	ENSG00000163874	-0.115508	6.18634	0.782617
MEAF6	ENSG00000163875	-0.11809	4.68914	0.781614
MIR5581	ENSG00000263675	-0.811751	-2.26721	1
SNIP1	ENSG00000163877	-0.364456	3.83577	0.405123
DNALI1	ENSG00000163879	0.427897	2.69516	0.356759
GNL2	ENSG00000134697	-0.307423	5.72064	0.462307
C1orf109	ENSG00000116922	0.161073	3.51437	0.72825
CDCA8	ENSG00000134690	-0.718462	1.27511	0.19641
YRDC	ENSG00000196449	-0.53522	3.51324	0.226317
C1orf122	ENSG00000197982	-0.285853	5.05675	0.500415
MTF1	ENSG00000188786	0.0401473	4.19406	0.938323
INPP5B	ENSG00000204084	0.0259012	4.03291	0.960721
SF3A3	ENSG00000183431	-0.355095	5.85478	0.397076
RNU6-510P	ENSG00000212541	-1.76704	-1.90686	0.398816
FHL3	ENSG00000183386	0.207174	5.33887	0.621192
UTP11	ENSG00000183520	-0.316752	4.52233	0.461161
RRAGC	ENSG00000116954	-0.927168	4.27395	0.0319974
AL139260.1	ENSG00000228436	-0.58124	0.444487	0.426936
MYCBP	ENSG00000214114	0.47235	2.16259	0.336518
AKIRIN1	ENSG00000174574	0.045601	6.05024	0.914902
NDUFS5	ENSG00000168653	-0.225113	6.1629	0.589137
MACF1	ENSG00000127603	0.403227	9.55957	0.326883
OXCT2P1	ENSG00000237624	0.976932	0.636963	0.11883
AL365277.1	ENSG00000182109	-0.447282	1.80277	0.405236
PPIEL	ENSG00000243970	0.425908	1.04014	0.51428
PABPC4	ENSG00000090621	0.142881	7.8649	0.729087
AL365277.2	ENSG00000228060	0.114189	-0.487795	1
SNORA55	ENSG00000201457	1.30033	0.583118	0.0392385
PPIE	ENSG00000084072	0.204242	4.91486	0.634021
TRIT1	ENSG00000043514	-0.197719	4.18493	0.647996
MFSD2A	ENSG00000168389	-0.817208	3.11734	0.0700897
AL663070.1	ENSG00000228477	-1.9402	-0.44043	0.0322922
CAP1	ENSG00000131236	-0.0498041	8.28582	0.904104
PPT1	ENSG00000131238	-0.37169	5.92772	0.37283
RLF	ENSG00000117000	0.503516	4.49057	0.23923
ZMPSTE24	ENSG00000084073	-0.432545	5.4747	0.302708
COL9A2	ENSG00000049089	1.83413	1.63598	0.000702602
SMAP2	ENSG00000084070	0.462777	4.5277	0.279002
EXO5	ENSG00000164002	-0.791836	1.84607	0.12643
NFYC	ENSG00000066136	-0.456006	4.24675	0.293115
CITED4	ENSG00000179862	0.951124	1.52408	0.0826523
CTPS1	ENSG00000171793	0.0828016	6.0334	0.844224
SCMH1	ENSG00000010803	-0.211841	5.70047	0.613387
HIVEP3	ENSG00000127124	0.0693358	4.89652	0.874258
FOXJ3	ENSG00000198815	-0.0806063	5.679	0.849657
PPCS	ENSG00000127125	-0.209637	4.08754	0.625926
PPIH	ENSG00000171960	-0.383491	2.66169	0.430285
YBX1	ENSG00000065978	-0.287577	8.93587	0.484451
P3H1	ENSG00000117385	-0.0758002	8.58132	0.85408
AC098484.1	ENSG00000228452	1.67924	-0.255099	0.0451175
SVBP	ENSG00000177868	0.171778	1.65685	0.777509
ERMAP	ENSG00000164010	-0.116584	3.89592	0.797208
ZNF691	ENSG00000164011	-0.125131	1.87888	0.842694
SLC2A1	ENSG00000117394	-0.191933	7.29095	0.642442
EBNA1BP2	ENSG00000117395	-0.427206	5.3991	0.309567
CDC20	ENSG00000117399	-0.683678	2.80402	0.146656
ELOVL1	ENSG00000066322	-0.161068	6.03385	0.700191
MED8	ENSG00000159479	-0.205753	5.21832	0.626496
AL139289.1	ENSG00000229431	-0.444081	0.729103	0.498095
SZT2	ENSG00000198198	0.255496	6.09581	0.539927
PTPRF	ENSG00000142949	0.808424	8.68296	0.0506262
KDM4A	ENSG00000066135	-0.0500024	5.82112	0.907127
ST3GAL3	ENSG00000126091	0.363934	4.21176	0.398899
IPO13	ENSG00000117408	-0.30474	5.3862	0.470694
DPH2	ENSG00000132768	-0.633543	4.04171	0.14755
ATP6V0B	ENSG00000117410	-0.49437	5.79042	0.23583
B4GALT2	ENSG00000117411	-0.0542039	6.64484	0.897275
CCDC24	ENSG00000159214	0.337601	2.66002	0.466804
SLC6A9	ENSG00000196517	-0.889589	5.57337	0.0344255
DMAP1	ENSG00000178028	-0.0804618	5.0594	0.848602
ERI3	ENSG00000117419	-0.151557	5.37582	0.720692
RNF220	ENSG00000187147	-0.213837	5.43808	0.610223
TMEM53	ENSG00000126106	-0.849467	1.98035	0.0907212
RNU5D-1	ENSG00000200169	1.58083	-2.07088	0.63929
KIF2C	ENSG00000142945	-0.842787	1.73509	0.113564
RPS8	ENSG00000142937	0.103542	9.54393	0.8011
SNORD46	ENSG00000200913	0.113258	-1.07298	1
PLK3	ENSG00000173846	-0.259691	5.65024	0.536288
TCTEX1D4	ENSG00000188396	-0.417222	1.15023	0.488704
BTBD19	ENSG00000222009	-0.392088	5.8526	0.347848
EIF2B3	ENSG00000070785	-0.403195	3.81402	0.359369
HECTD3	ENSG00000126107	0.00730956	5.36753	0.992036
UROD	ENSG00000126088	-0.299781	5.98204	0.472432
MUTYH	ENSG00000132781	-0.294627	2.52908	0.530514
TOE1	ENSG00000132773	-0.556825	2.53231	0.245605
TESK2	ENSG00000070759	0.758275	2.33065	0.111993
PRDX1	ENSG00000117450	-0.217294	7.80809	0.598254
AKR1A1	ENSG00000117448	-0.0398969	5.95088	0.926092
NASP	ENSG00000132780	-0.450997	5.28311	0.285141
GPBP1L1	ENSG00000159592	0.0053834	5.7492	0.992714
TMEM69	ENSG00000159596	-0.133201	3.96572	0.76702
IPP	ENSG00000197429	0.281356	2.98119	0.537648
MAST2	ENSG00000086015	0.291075	7.34962	0.481007
POMGNT1	ENSG00000085998	0.200953	6.01261	0.630467
LRRC41	ENSG00000132128	0.130898	6.81252	0.752609
UQCRH	ENSG00000173660	-0.0434364	5.85271	0.919575
NSUN4	ENSG00000117481	-0.0474185	3.89143	0.924599
MKNK1	ENSG00000079277	-0.0461671	5.01971	0.91934
MOB3C	ENSG00000142961	0.38414	4.30222	0.36927
ATPAF1	ENSG00000123472	0.0785732	5.12402	0.855121
EFCAB14	ENSG00000159658	0.145468	5.84823	0.728914
CMPK1	ENSG00000162368	0.0555295	6.51539	0.89494
FAF1	ENSG00000185104	0.29351	4.86583	0.490192
CDKN2C	ENSG00000123080	0.204935	2.29607	0.702483
RNF11	ENSG00000123091	0.185645	6.20397	0.656155
EPS15	ENSG00000085832	-0.0387345	5.53032	0.928842
OSBPL9	ENSG00000117859	0.098687	6.4318	0.813293
NRDC	ENSG00000078618	0.162992	7.16307	0.693693
RAB3B	ENSG00000169213	0.740758	6.52022	0.0750889
TXNDC12	ENSG00000117862	-0.447381	5.6976	0.28489
KTI12	ENSG00000198841	-0.455406	3.39829	0.308671
BTF3L4	ENSG00000134717	-0.576811	5.64167	0.169441
ZFYVE9	ENSG00000157077	0.0792667	4.41786	0.864017
CC2D1B	ENSG00000154222	-0.470214	5.20755	0.262476
PRPF38A	ENSG00000134748	-0.0785308	4.50057	0.857102
ZCCHC11	ENSG00000134744	-0.0372181	5.43656	0.931704
GPX7	ENSG00000116157	0.121842	4.78372	0.777762
COA7	ENSG00000162377	-0.735863	4.12506	0.0906398
ZYG11B	ENSG00000162378	0.195289	4.75839	0.65013
ECHDC2	ENSG00000121310	-0.0270369	5.31401	0.954577
AC099677.1	ENSG00000230953	0.114593	-0.0725804	0.880562
SCP2	ENSG00000116171	0.0630906	5.95842	0.881776
PODN	ENSG00000174348	-0.682819	3.03396	0.13469
C1orf123	ENSG00000162384	0.193085	4.85503	0.6501
MAGOH	ENSG00000162385	-0.447883	3.09376	0.333466
LRP8	ENSG00000157193	-0.515044	3.96426	0.238007
GLIS1	ENSG00000174332	0.0673326	4.1614	0.883174
NDC1	ENSG00000058804	-0.308313	3.46793	0.495532
YIPF1	ENSG00000058799	-0.249631	3.96632	0.569692
HSPB11	ENSG00000081870	-0.23376	3.08236	0.611325
LRRC42	ENSG00000116212	0.222304	5.1524	0.598232
TMEM59	ENSG00000116209	-0.185034	7.19461	0.654642
MRPL37	ENSG00000116221	0.0103377	6.04631	0.982596
SSBP3	ENSG00000157216	-0.380922	6.30062	0.359588
PARS2	ENSG00000162396	-0.586059	1.78859	0.269721
DHCR24	ENSG00000116133	0.339177	7.07438	0.412185
PCSK9	ENSG00000169174	-0.379828	2.50537	0.420993
USP24	ENSG00000162402	0.0136345	5.92255	0.976501
PLPP3	ENSG00000162407	-0.354666	6.47608	0.392991
RPL21P23	ENSG00000236776	-0.243124	-0.752862	0.82928
OMA1	ENSG00000162600	0.231728	3.04426	0.619549
MYSM1	ENSG00000162601	0.147549	5.51717	0.725135
JUN	ENSG00000177606	0.77921	9.00612	0.059347
TM2D1	ENSG00000162604	-0.155805	3.70832	0.72502
USP1	ENSG00000162607	0.247213	4.09602	0.569993
DOCK7	ENSG00000116641	-0.0210558	6.11098	0.961892
ATG4C	ENSG00000125703	0.181902	2.71745	0.704942
ALG6	ENSG00000088035	0.268669	2.77652	0.574093
PGM1	ENSG00000079739	0.476952	6.65314	0.250203
RN7SL130P	ENSG00000244256	0.470745	-0.749008	0.82928
ROR1	ENSG00000185483	-0.750601	3.51332	0.0935054
CACHD1	ENSG00000158966	-0.158056	3.731	0.728426
RAVER2	ENSG00000162437	0.127968	2.80519	0.78236
JAK1	ENSG00000162434	0.155457	7.46634	0.70675
MIR3671	ENSG00000265996	1.02335	-2.26475	1
AK4	ENSG00000162433	1.05173	3.6314	0.0171208
LEPROT	ENSG00000213625	0.26682	6.54649	0.520331
MIER1	ENSG00000198160	0.0478849	5.04638	0.9159
SLC35D1	ENSG00000116704	0.573579	5.36382	0.172546
SERBP1	ENSG00000142864	-0.0320436	7.68806	0.938754
RNU6-387P	ENSG00000223263	-0.811751	-2.26721	1
GADD45A	ENSG00000116717	-0.0414688	7.24113	0.92095
GNG12	ENSG00000172380	0.0472517	7.35057	0.909692
DIRAS3	ENSG00000162595	0.0291575	2.34483	1
WLS	ENSG00000116729	-0.404574	6.46019	0.329933
LRRC40	ENSG00000066557	-0.206207	3.88563	0.643477
SRSF11	ENSG00000116754	0.0385162	7.97441	0.926049
ANKRD13C	ENSG00000118454	0.13536	4.44675	0.758205
HHLA3	ENSG00000197568	0.599449	1.57856	0.255695
CTH	ENSG00000116761	-1.26006	3.59878	0.00478755
ZRANB2	ENSG00000132485	0.0662811	6.12258	0.875277
MIR186	ENSG00000207721	-1.55654	-0.689041	0.0883316
NEGR1	ENSG00000172260	0.426752	4.77384	0.314256
FPGT	ENSG00000254685	-0.475978	2.30281	0.340344
CRYZ	ENSG00000116791	0.0983528	4.32497	0.823852
TYW3	ENSG00000162623	-0.072131	3.83509	0.877068
ACADM	ENSG00000117054	-0.185809	4.44266	0.666453
RABGGTB	ENSG00000137955	0.0191581	5.89916	0.965942
ST6GALNAC5	ENSG00000117069	0.202598	6.65674	0.62543
MIR7156	ENSG00000276081	-4.58952	-2.26966	0.264706
AL035409.1	ENSG00000230498	0.982387	0.18287	0.142547
PIGK	ENSG00000142892	0.0819344	5.16172	0.849615
AC113935.1	ENSG00000226084	-1.00462	-0.756713	0.275999
AK5	ENSG00000154027	0.40155	3.04717	0.380432
ZZZ3	ENSG00000036549	-0.0523796	4.98891	0.907474
USP33	ENSG00000077254	0.148868	5.8303	0.722852
MIGA1	ENSG00000180488	0.516091	3.8277	0.23799
NEXN	ENSG00000162614	-0.239169	6.09988	0.566266
FUBP1	ENSG00000162613	-0.363135	6.14102	0.383153
DNAJB4	ENSG00000162616	-0.361965	5.49696	0.388543
AC103591.3	ENSG00000273338	-0.601801	-1.49038	0.746295
PTGFR	ENSG00000122420	0.52228	5.07222	0.216338
IFI44	ENSG00000137965	0.716434	3.14828	0.111598
ADGRL4	ENSG00000162618	-0.553135	3.94438	0.201233
ADGRL2	ENSG00000117114	0.344997	5.73172	0.410198
TTLL7	ENSG00000137941	0.172692	4.98648	0.688149
PRKACB	ENSG00000142875	0.257434	5.23756	0.54045
RPF1	ENSG00000117133	-0.516626	3.98588	0.23887
GNG5	ENSG00000174021	-0.412204	5.85148	0.323893
CTBS	ENSG00000117151	0.575825	4.20632	0.184222
AC114482.1	ENSG00000232622	5.6725	-1.74433	0.0409646
SSX2IP	ENSG00000117155	0.689489	3.36905	0.126587
AL603750.1	ENSG00000280099	0.57057	1.66239	0.280152
SYDE2	ENSG00000097096	0.945274	4.18209	0.0284233
C1orf52	ENSG00000162642	0.124981	4.78222	0.771834
Y_RNA	ENSG00000223254	-1.07674	-1.26998	0.388527
BCL10	ENSG00000142867	-0.177818	3.69808	0.688917
DDAH1	ENSG00000153904	-0.106883	7.91945	0.79569
Y_RNA	ENSG00000199459	4.70051	-2.26229	0.264706
AC092807.3	ENSG00000282057	-0.657585	2.49353	0.173023
CYR61	ENSG00000142871	0.346937	11.0526	0.398348
ZNHIT6	ENSG00000117174	-0.302915	4.38232	0.481552
ODF2L	ENSG00000122417	0.12439	4.87581	0.774802
MIR7856	ENSG00000278281	-3.11968	-2.75279	1
SH3GLB1	ENSG00000097033	0.00846985	6.78855	0.985123
SELENOF	ENSG00000183291	-0.3655	6.77109	0.377727
HS2ST1	ENSG00000153936	-0.241303	4.86882	0.574328
LMO4	ENSG00000143013	0.578081	7.12987	0.16269
PKN2	ENSG00000065243	0.0567106	5.19089	0.892512
ELOCP19	ENSG00000241975	-0.171734	-0.489601	0.851299
GTF2B	ENSG00000137947	-0.582768	4.24671	0.174874
KYAT3	ENSG00000137944	-0.0256213	4.45742	0.955679
RBMXL1	ENSG00000213516	-0.163894	3.51977	0.715896
GBP3	ENSG00000117226	0.371915	3.86702	0.391904
GBP1	ENSG00000117228	0.444329	5.96655	0.288096
PTGES3P1	ENSG00000234518	0.995408	-0.482372	0.345267
GBP2	ENSG00000162645	1.61288	5.93494	0.000154963
GBP4	ENSG00000162654	1.40162	2.46344	0.00380299
LRRC8D	ENSG00000171492	-0.0734008	4.99389	0.861964
ZNF326	ENSG00000162664	-0.74908	4.45578	0.0814576
ZNF644	ENSG00000122482	0.0716883	4.43368	0.873039
CDC7	ENSG00000097046	0.94119	1.78521	0.0626901
TGFBR3	ENSG00000069702	1.18622	3.80213	0.0070775
GLMN	ENSG00000174842	-0.162749	2.84858	0.726673
RPAP2	ENSG00000122484	-0.223221	4.09481	0.610344
EVI5	ENSG00000067208	0.165107	5.04734	0.700197
RPL5	ENSG00000122406	0.118525	9.40595	0.773077
FAM69A	ENSG00000154511	0.20449	4.13	0.643904
SNORA66	ENSG00000207523	0.110994	-1.75128	1
MTF2	ENSG00000143033	0.121576	3.84463	0.790911
TMED5	ENSG00000117500	-0.014096	5.74562	0.975407
CCDC18-AS1	ENSG00000223745	0.753146	4.36882	0.0788035
DR1	ENSG00000117505	0.00068806	5.64678	1
FNBP1L	ENSG00000137942	0.0249654	5.17255	0.954522
BCAR3	ENSG00000137936	0.0501457	5.97735	0.906394
AL109613.1	ENSG00000224093	-0.355234	1.20749	0.551933
DNTTIP2	ENSG00000067334	-0.422018	5.20269	0.317714
GCLM	ENSG00000023909	-0.306122	4.6889	0.470057
ARHGAP29	ENSG00000137962	0.211217	4.939	0.615735
ABCD3	ENSG00000117528	0.33349	4.59995	0.432724
F3	ENSG00000117525	0.432646	5.18633	0.306786
CNN3	ENSG00000117519	0.152899	7.97242	0.71077
AC105942.1	ENSG00000235501	0.866955	2.15876	0.0776559
RWDD3	ENSG00000122481	0.0160341	1.43453	1
RPL7P9	ENSG00000137970	-0.727816	0.443142	0.305809
PTBP2	ENSG00000117569	-0.211262	3.93944	0.627055
DPYD	ENSG00000188641	0.742201	5.32005	0.0775997
LINC01930	ENSG00000269998	-0.0955962	1.35154	0.946104
MIR137HG	ENSG00000225206	-0.0430424	3.03952	0.943143
SNX7	ENSG00000162627	0.449202	5.18783	0.286335
AGL	ENSG00000162688	0.0946422	4.36501	0.82823
MFSD14A	ENSG00000156875	-0.249505	1.8654	0.652626
TRMT13	ENSG00000122435	-0.528293	2.74437	0.261094
DBT	ENSG00000137992	0.463777	3.88629	0.286064
RTCA-AS1	ENSG00000224616	1.76743	-0.419084	0.045436
RTCA	ENSG00000137996	-0.25506	5.17073	0.548259
VCAM1	ENSG00000162692	0.585284	2.80047	0.208514
EXTL2	ENSG00000162694	-0.112198	4.74615	0.795578
SLC30A7	ENSG00000162695	-0.307387	5.4461	0.465246
DPH5	ENSG00000117543	0.282819	4.54105	0.511016
AC093157.1	ENSG00000233184	-0.745611	2.2281	0.124668
AL109741.1	ENSG00000225938	0.620849	-0.677674	0.677528
S1PR1	ENSG00000170989	0.430631	4.12186	0.321694
COL11A1	ENSG00000060718	0.520459	9.82383	0.206074
RNPC3	ENSG00000185946	-0.278153	3.07148	0.545252
PRMT6	ENSG00000198890	-0.654129	3.55524	0.140692
HENMT1	ENSG00000162639	0.115363	1.81083	0.877333
PRPF38B	ENSG00000134186	-0.487859	5.74524	0.244433
STXBP3	ENSG00000116266	-0.374664	4.56332	0.382361
CLCC1	ENSG00000121940	0.167624	4.53703	0.69914
WDR47	ENSG00000085433	0.183329	4.15876	0.683358
BX679664.3	ENSG00000244716	0.458901	-0.212147	0.635154
TAF13	ENSG00000197780	-0.227574	4.66535	0.594529
TMEM167B	ENSG00000215717	-0.0132487	5.62497	0.976624
SARS	ENSG00000031698	-0.744392	7.77182	0.0721613
PSRC1	ENSG00000134222	0.664577	2.08627	0.188918
SORT1	ENSG00000134243	0.044209	6.95219	0.915989
PSMA5	ENSG00000143106	-0.273125	6.49243	0.510725
ATXN7L2	ENSG00000162650	-0.342121	2.82166	0.459959
CYB561D1	ENSG00000174151	-0.292531	3.49495	0.514503
GNAI3	ENSG00000065135	-0.0272117	6.32098	0.949663
RNU6V	ENSG00000206832	-4.03421	-2.49093	0.509804
AMPD2	ENSG00000116337	0.0731535	6.82354	0.860777
GSTM4	ENSG00000168765	0.192563	4.25431	0.662968
GSTM2	ENSG00000213366	0.886654	5.61228	0.034787
GSTM1	ENSG00000134184	0.171	4.72582	0.693332
GSTM5	ENSG00000134201	0.748479	3.05298	0.100866
GSTM3	ENSG00000134202	0.396278	5.79533	0.342135
CSF1	ENSG00000184371	0.618269	7.41187	0.135126
AHCYL1	ENSG00000168710	0.922402	7.59048	0.0263544
STRIP1	ENSG00000143093	-0.280559	5.3145	0.506831
AL160006.1	ENSG00000258634	0.595809	2.73079	0.19837
RBM15	ENSG00000162775	-0.000897117	2.75305	1
SLC16A4	ENSG00000168679	0.858325	4.25285	0.0474569
LAMTOR5	ENSG00000134248	-0.173862	5.5156	0.677888
LRIF1	ENSG00000121931	0.21651	3.58864	0.630177
DRAM2	ENSG00000156171	0.483091	4.5813	0.257557
CEPT1	ENSG00000134255	0.153898	4.17257	0.727578
DENND2D	ENSG00000162777	0.928526	2.29832	0.0581179
OVGP1	ENSG00000085465	0.647265	1.53517	0.218797
UBE2FP3	ENSG00000233337	-0.393071	-0.683361	0.677528
WDR77	ENSG00000116455	-0.761909	4.29632	0.0781274
ATP5F1	ENSG00000116459	-0.254339	6.41037	0.540575
RAP1A	ENSG00000116473	0.251616	5.4927	0.550755
DDX20	ENSG00000064703	-0.691317	3.67249	0.115655
CTTNBP2NL	ENSG00000143079	0.325194	5.35172	0.438852
WNT2B	ENSG00000134245	3.43995	5.20974	1.81052e-13
CAPZA1	ENSG00000116489	0.15881	7.05863	0.701382
MOV10	ENSG00000155363	0.232793	6.17069	0.576361
RHOC	ENSG00000155366	0.36242	7.12228	0.380801
PPM1J	ENSG00000155367	1.61977	1.64778	0.00249964
FAM19A3	ENSG00000184599	-0.341537	0.315679	0.715251
LRIG2	ENSG00000198799	0.19022	4.2986	0.657265
MAGI3	ENSG00000081026	0.124735	3.23705	0.802164
PHTF1	ENSG00000116793	-0.0233527	4.48067	0.963682
AL133517.1	ENSG00000232450	0.220488	-0.11759	0.757981
RSBN1	ENSG00000081019	0.429845	3.01604	0.345084
AP4B1	ENSG00000134262	-0.218011	3.88542	0.624039
DCLRE1B	ENSG00000118655	-0.341313	2.26993	0.50849
HIPK1	ENSG00000163349	0.111165	5.86165	0.791709
OLFML3	ENSG00000116774	-0.330581	8.79408	0.421748
TRIM33	ENSG00000197323	0.0826639	5.08672	0.846564
BCAS2	ENSG00000116752	-0.0973412	4.31055	0.830053
NRAS	ENSG00000213281	-0.344067	5.98119	0.409423
CSDE1	ENSG00000009307	0.38313	8.91464	0.351849
RNY1P13	ENSG00000201900	-1.2661	-1.17138	0.274268
SIKE1	ENSG00000052723	-0.0891788	4.72734	0.840935
TSPAN2	ENSG00000134198	0.76031	1.86821	0.132095
NGF	ENSG00000134259	0.0200051	2.20295	1
VANGL1	ENSG00000173218	0.0115885	4.31475	0.983719
SLC22A15	ENSG00000163393	-1.37563	2.98691	0.00310295
ATP1A1	ENSG00000163399	0.104282	7.82871	0.800641
CD58	ENSG00000116815	-0.147251	2.73142	0.771831
PTGFRN	ENSG00000134247	0.209555	6.41295	0.614307
TRIM45	ENSG00000134253	0.552726	3.17928	0.221952
MAN1A2	ENSG00000198162	0.17495	5.49121	0.679458
GDAP2	ENSG00000196505	-0.241271	3.31887	0.593213
WDR3	ENSG00000065183	-0.495596	4.68373	0.245604
WARS2	ENSG00000116874	0.485718	2.78638	0.298492
AL359915.2	ENSG00000231365	-0.206062	2.64422	0.669069
ZNF697	ENSG00000143067	-0.576043	4.33373	0.18035
PHGDH	ENSG00000092621	-0.954413	7.46985	0.0216958
AL359752.1	ENSG00000261662	0.348562	2.29832	0.469555
NOTCH2	ENSG00000134250	0.968009	9.06641	0.0195273
SEC22B	ENSG00000265808	0.0793438	7.47185	0.848142
AC244669.1	ENSG00000223804	-0.792623	0.646329	0.221769
U1	ENSG00000273727	1.65848	-1.06678	0.191851
PFN1P2	ENSG00000270392	0.359198	0.907932	0.598281
NBPF8	ENSG00000270231	0.0913879	5.28914	0.829108
AC241952.1	ENSG00000275131	0.351805	5.1954	0.404582
NBPF26	ENSG00000273136	0.164193	4.41343	0.702579
RNVU1-19	ENSG00000275538	-0.446489	-1.9045	1
HIST2H2BA	ENSG00000223345	0.912027	-0.367011	0.30031
HIST2H3DP1	ENSG00000213244	-0.551498	-0.988532	0.62414
SRGAP2C	ENSG00000171943	0.37356	4.01557	0.38796
AC239859.6	ENSG00000277702	0.422982	2.11288	0.389437
SRGAP2D	ENSG00000270872	0.354767	0.630681	0.607792
AC245595.1	ENSG00000232527	1.21842	1.36803	0.0278877
RNVU1-15	ENSG00000207205	5.89084	-1.60579	0.0226768
NBPF15	ENSG00000266338	0.0785466	6.34222	0.85147
PFN1P6	ENSG00000227212	-0.236567	0.416088	0.817963
SRGAP2B	ENSG00000196369	0.755224	3.57654	0.0876635
AC245014.3	ENSG00000276216	3.27842	-1.15665	0.0215665
U1	ENSG00000270722	4.70051	-2.26229	0.264706
NBPF25P	ENSG00000272150	0.115497	2.87099	0.811678
RNF115	ENSG00000265491	-0.328086	5.19168	0.435806
POLR3C	ENSG00000186141	-0.197746	4.76667	0.646457
NUDT17	ENSG00000186364	-0.167764	1.6521	0.777509
PIAS3	ENSG00000131788	0.307891	6.10186	0.459869
PEX11B	ENSG00000131779	-0.0567475	4.047	0.912527
RBM8A	ENSG00000265241	-0.641263	4.88314	0.13078
LIX1L	ENSG00000271601	0.0773964	5.07903	0.85531
ANKRD34A	ENSG00000272031	0.171919	2.22382	0.749344
POLR3GL	ENSG00000121851	0.371875	2.91012	0.437804
TXNIP	ENSG00000265972	0.716049	6.54036	0.0851966
RNVU1-6	ENSG00000201558	5.6725	-1.74433	0.0409646
NBPF10	ENSG00000271425	0.469411	4.98671	0.268531
U1	ENSG00000273768	5.6725	-1.74433	0.0409646
NBPF12	ENSG00000268043	-0.0857956	4.39047	0.846196
PRKAB2	ENSG00000131791	0.649182	5.61763	0.122286
PDIA3P1	ENSG00000180867	-0.355234	1.20749	0.551933
CHD1L	ENSG00000131778	0.0701499	4.50905	0.879129
BCL9	ENSG00000116128	0.0840124	4.90684	0.848247
ACP6	ENSG00000162836	0.839382	3.47261	0.0580982
RNVU1-7	ENSG00000206585	1.98193	-1.89978	0.398816
NBPF11	ENSG00000263956	-0.18246	4.09556	0.679461
PFN1P4	ENSG00000225080	-0.339288	-0.551973	0.698224
AC245100.3	ENSG00000228626	-0.200702	-1.37374	1
U1	ENSG00000274210	1.65848	-1.06678	0.191851
NBPF14	ENSG00000270629	0.662734	6.71012	0.110543
PDE4DIP	ENSG00000178104	0.0398583	8.01245	0.923434
RNU2-38P	ENSG00000222788	0.110994	-1.75128	1
NBPF9	ENSG00000269713	-0.224612	5.32092	0.594896
RNU1-59P	ENSG00000201699	5.10161	-2.06847	0.139845
AC245297.3	ENSG00000274265	-0.94218	1.14418	0.10198
AC245297.1	ENSG00000215861	-0.147284	3.0481	0.758758
AC242843.1	ENSG00000274423	-0.171734	-0.489601	0.851299
NBPF19	ENSG00000271383	0.184091	5.33097	0.663251
HIST2H2AA4	ENSG00000272196	-0.611417	-0.754788	0.516292
HIST2H2BE	ENSG00000184678	0.643198	4.58245	0.131897
BOLA1	ENSG00000178096	-0.0890283	1.95862	0.887296
SV2A	ENSG00000159164	0.411407	5.45805	0.326831
SF3B4	ENSG00000143368	-0.655197	5.65294	0.118119
MTMR11	ENSG00000014914	0.719393	4.24813	0.0957104
OTUD7B	ENSG00000264522	0.32774	4.91579	0.441777
VPS45	ENSG00000136631	-0.359334	4.67127	0.402768
PLEKHO1	ENSG00000023902	0.0462432	6.0366	0.913706
ANP32E	ENSG00000143401	-0.00316956	5.05831	1
APH1A	ENSG00000117362	-0.0599621	6.29875	0.886931
C1orf54	ENSG00000118292	0.676659	2.66551	0.152727
CIART	ENSG00000159208	0.397138	2.56962	0.400972
MRPS21	ENSG00000266472	-0.374872	4.67599	0.382004
PRPF3	ENSG00000117360	-0.574231	5.17653	0.173533
RPRD2	ENSG00000163125	0.06055	5.22919	0.890924
TARS2	ENSG00000143374	0.158195	4.18922	0.714239
ECM1	ENSG00000143369	0.343019	6.40444	0.408935
ADAMTSL4	ENSG00000143382	1.42644	3.90236	0.00124527
MCL1	ENSG00000143384	0.0969894	8.89072	0.813687
ENSA	ENSG00000143420	0.074488	5.52416	0.861131
U4	ENSG00000276103	-0.811751	-2.26721	1
GOLPH3L	ENSG00000143457	-0.156699	4.34143	0.725794
CTSK	ENSG00000143387	-0.388914	5.22854	0.354348
ARNT	ENSG00000143437	0.26247	6.25361	0.528222
SETDB1	ENSG00000143379	-0.127677	4.96024	0.766935
CERS2	ENSG00000143418	-0.125975	5.90918	0.764241
MINDY1	ENSG00000143409	0.942932	3.05089	0.0386164
PRUNE1	ENSG00000143363	-0.00173989	3.46952	1
C1orf56	ENSG00000143443	-0.506436	1.53442	0.362374
CDC42SE1	ENSG00000197622	-0.0507052	6.7389	0.90383
MLLT11	ENSG00000213190	-0.0860023	5.3553	0.840399
GABPB2	ENSG00000143458	-0.393652	3.38311	0.381376
SEMA6C	ENSG00000143434	0.0193804	2.85758	0.978725
SCNM1	ENSG00000163156	-0.0685902	4.26286	0.874176
LYSMD1	ENSG00000163155	0.104375	2.96723	0.842268
VPS72	ENSG00000163159	-0.244713	4.6515	0.568757
PIP5K1A	ENSG00000143398	0.271803	6.75685	0.511912
PSMD4	ENSG00000159352	-0.265867	6.79857	0.521103
ZNF687	ENSG00000143373	0.0852198	4.826	0.845441
PI4KB	ENSG00000143393	0.160799	6.17642	0.70011
RFX5	ENSG00000143390	0.0487984	4.689	0.918017
SELENBP1	ENSG00000143416	0.531426	4.78052	0.213228
PSMB4	ENSG00000159377	-0.356549	6.89822	0.389153
POGZ	ENSG00000143442	-0.0539385	6.37564	0.898276
RNY4P25	ENSG00000238711	-4.58952	-2.26966	0.264706
TUFT1	ENSG00000143367	0.00539604	5.19692	0.995526
SNX27	ENSG00000143376	0.194795	4.93026	0.646946
MRPL9	ENSG00000143436	-0.213523	4.40833	0.624793
THEM4	ENSG00000159445	-0.334013	3.85412	0.44341
S100A10	ENSG00000197747	-0.340726	6.11831	0.413329
S100A11	ENSG00000163191	-0.672991	7.83135	0.103649
S100A6	ENSG00000197956	0.0517425	8.34461	0.900332
S100A4	ENSG00000196154	1.12084	5.16284	0.00831757
S100A3	ENSG00000188015	0.772118	0.0621567	0.258093
S100A16	ENSG00000188643	-0.147586	6.44472	0.723074
S100A13	ENSG00000189171	-0.0864517	4.09484	0.850031
CHTOP	ENSG00000160679	-0.0125784	5.48947	0.978014
SNAPIN	ENSG00000143553	-0.0384017	4.16421	0.937139
ILF2	ENSG00000143621	-0.320111	6.80706	0.439681
DENND4B	ENSG00000198837	0.00285965	5.79771	0.997456
CRTC2	ENSG00000160741	-0.154824	4.8879	0.713601
SLC39A1	ENSG00000143570	0.0863789	6.68437	0.835934
CREB3L4	ENSG00000143578	0.274672	2.31456	0.596572
JTB	ENSG00000143543	-0.274614	6.23629	0.509382
AL358472.2	ENSG00000272654	-0.156661	0.757693	0.849047
RAB13	ENSG00000143545	-0.0211549	7.06884	0.96033
RPS27	ENSG00000177954	0.105751	7.21026	0.798604
TPM3	ENSG00000143549	-0.184543	7.62221	0.654818
C1orf43	ENSG00000143612	-0.218376	6.82232	0.598258
UBAP2L	ENSG00000143569	-0.416912	7.47266	0.312777
HAX1	ENSG00000143575	-0.549857	5.92434	0.188006
ATP8B2	ENSG00000143515	0.0136927	7.14414	0.97467
RNU7-57P	ENSG00000238365	1.85663	-1.36719	0.217138
UBE2Q1	ENSG00000160714	-0.334088	5.95137	0.423315
ADAR	ENSG00000160710	0.143083	7.6222	0.728993
PMVK	ENSG00000163344	-0.373979	3.75264	0.396135
PBXIP1	ENSG00000163346	-0.0446826	7.44674	0.91456
PYGO2	ENSG00000163348	0.254253	4.77687	0.550147
SHC1	ENSG00000160691	0.0124032	8.85695	0.976268
CKS1B	ENSG00000173207	-0.510899	2.78225	0.272838
FLAD1	ENSG00000160688	-0.433566	4.39214	0.312059
ZBTB7B	ENSG00000160685	0.112979	5.04374	0.788962
ADAM15	ENSG00000143537	0.132964	6.47797	0.749593
EFNA4	ENSG00000243364	-0.524567	2.83665	0.263832
SLC50A1	ENSG00000169241	0.207441	4.76811	0.630669
DPM3	ENSG00000179085	0.325642	2.2077	0.517319
TRIM46	ENSG00000163462	0.0192229	4.08927	0.971581
MUC1	ENSG00000185499	-0.60062	3.34652	0.176044
AC234582.1	ENSG00000231064	0.366487	2.08183	0.456512
THBS3	ENSG00000169231	-0.23959	6.58581	0.563796
MTX1	ENSG00000173171	-0.0652689	3.97788	0.888172
GBAP1	ENSG00000160766	-1.1366	1.67961	0.028989
FDPS	ENSG00000160752	0.628838	6.47746	0.13041
RUSC1-AS1	ENSG00000225855	0.413658	3.81058	0.350858
RUSC1	ENSG00000160753	0.221273	4.99282	0.601487
ASH1L	ENSG00000116539	0.299716	5.99444	0.472404
MSTO1	ENSG00000125459	-0.396181	4.00936	0.359108
YY1AP1	ENSG00000163374	0.0852219	4.96296	0.843548
DAP3	ENSG00000132676	-0.36474	6.06471	0.381411
MSTO2P	ENSG00000203761	-0.315209	2.23452	0.526898
GON4L	ENSG00000116580	0.112014	5.58513	0.78965
SYT11	ENSG00000132718	0.447336	4.78209	0.291962
RIT1	ENSG00000143622	-0.135679	5.12603	0.75056
KHDC4	ENSG00000132680	0.249685	5.09246	0.55858
SNORA80E	ENSG00000207475	5.41511	-1.89741	0.0751017
RXFP4	ENSG00000173080	-1.67694	0.235034	0.0160516
ARHGEF2	ENSG00000116584	-0.653637	7.24053	0.114591
SSR2	ENSG00000163479	-0.219306	7.87854	0.59478
UBQLN4	ENSG00000160803	-0.20682	5.12833	0.625155
LAMTOR2	ENSG00000116586	-0.0571901	3.80812	0.908796
MEX3A	ENSG00000254726	0.108067	4.52102	0.803892
LMNA	ENSG00000160789	-0.533713	9.1809	0.195075
SLC25A44	ENSG00000160785	0.130721	5.09395	0.763505
PMF1	ENSG00000160783	-0.0634914	2.95886	0.900683
PAQR6	ENSG00000160781	-0.123339	2.0227	0.856845
SMG5	ENSG00000198952	-0.0598881	6.71609	0.88628
TMEM79	ENSG00000163472	0.0323215	2.65497	0.975772
GLMP	ENSG00000198715	-0.190442	5.98146	0.648741
CCT3	ENSG00000163468	-0.460363	7.44446	0.265194
MEF2D	ENSG00000116604	0.061805	6.03299	0.884022
Y_RNA	ENSG00000206651	5.10161	-2.06847	0.139845
NAXE	ENSG00000163382	0.0561964	4.78402	0.89945
GPATCH4	ENSG00000160818	-0.509996	4.3328	0.235294
NES	ENSG00000132688	0.197013	5.57331	0.642353
CRABP2	ENSG00000143320	1.5	6.90062	0.000375791
ISG20L2	ENSG00000143319	-0.0239066	4.82693	0.965488
RRNAD1	ENSG00000143303	0.372513	3.44095	0.41072
MRPL24	ENSG00000143314	-0.36364	4.28607	0.397876
HDGF	ENSG00000143321	0.000461606	7.58094	0.999968
PRCC	ENSG00000143294	-0.145474	5.6163	0.729866
PEAR1	ENSG00000187800	0.598052	6.58072	0.149913
ARHGEF11	ENSG00000132694	-0.327949	5.89312	0.431978
ETV3	ENSG00000117036	-0.0506573	5.17821	0.905051
KIRREL1	ENSG00000183853	-0.0373705	8.44799	0.928026
IFI16	ENSG00000163565	-0.400944	6.05122	0.336004
DUSP23	ENSG00000158716	-0.911333	2.19833	0.0627841
AL590560.2	ENSG00000272668	1.10314	-0.258503	0.189131
TAGLN2	ENSG00000158710	-0.229483	7.74314	0.577964
LINC01133	ENSG00000224259	-2.07369	2.11886	5.66938e-05
AL513302.2	ENSG00000260766	-0.326589	0.900071	0.598281
PIGM	ENSG00000143315	-0.468953	3.18988	0.299144
IGSF8	ENSG00000162729	0.430199	4.60354	0.315639
PEA15	ENSG00000162734	-0.255151	8.48059	0.535339
DCAF8	ENSG00000132716	-0.0920954	5.44142	0.83088
AL139011.1	ENSG00000228606	-0.231143	0.678947	0.765407
PEX19	ENSG00000162735	0.428427	5.19451	0.309916
COPA	ENSG00000122218	-0.0445179	8.89816	0.914042
Y_RNA	ENSG00000202078	-0.875659	-0.125731	0.264725
NCSTN	ENSG00000162736	-0.290172	7.21254	0.48267
F11R	ENSG00000158769	1.60979	2.71935	0.000784439
USF1	ENSG00000158773	-0.0265871	4.89035	0.955893
PFDN2	ENSG00000143256	-0.56189	5.00335	0.183596
NIT1	ENSG00000158793	0.209304	4.05452	0.626786
DEDD	ENSG00000158796	-0.15168	4.45504	0.731318
UFC1	ENSG00000143222	-0.28288	5.29828	0.501761
USP21	ENSG00000143258	0.111541	4.41847	0.797492
PPOX	ENSG00000143224	-0.141787	3.51643	0.75453
B4GALT3	ENSG00000158850	-0.0150229	5.5046	0.974632
ADAMTS4	ENSG00000158859	0.210789	4.38376	0.626423
NDUFS2	ENSG00000158864	0.0184887	6.29812	0.966464
TOMM40L	ENSG00000158882	0.45412	3.53828	0.302044
SDHC	ENSG00000143252	0.109936	6.2444	0.792761
DUSP12	ENSG00000081721	-0.35808	3.53116	0.427565
ATF6	ENSG00000118217	-0.275313	5.51084	0.510801
OLFML2B	ENSG00000162745	1.70855	3.67579	0.00015539
UHMK1	ENSG00000152332	0.0596383	6.04468	0.888117
UAP1	ENSG00000117143	-0.253516	6.33676	0.542157
AL596325.2	ENSG00000272574	-1.3946	0.0451979	0.0560418
DDR2	ENSG00000162733	-0.0905469	8.33265	0.826172
HSD17B7	ENSG00000132196	0.686933	2.53001	0.14467
RGS4	ENSG00000117152	0.168478	7.48254	0.683384
RGS5	ENSG00000143248	1.70572	3.06707	0.000249945
PBX1	ENSG00000185630	0.591285	5.70449	0.157497
MGST3	ENSG00000143198	-0.00528885	5.55212	0.992982
ALDH9A1	ENSG00000143149	-0.271574	5.84158	0.515108
TMCO1	ENSG00000143183	-0.430957	5.31699	0.303725
UCK2	ENSG00000143179	-0.459602	5.20429	0.276474
AL596087.1	ENSG00000215835	-0.527137	1.90755	0.305174
POGK	ENSG00000143157	-0.130349	5.05458	0.761971
TADA1	ENSG00000152382	0.12967	2.62214	0.803806
POU2F1	ENSG00000143190	0.261	3.9537	0.549273
CREG1	ENSG00000143162	-0.924321	5.06548	0.0292229
MPZL1	ENSG00000197965	-0.131186	7.38565	0.751122
MPC2	ENSG00000143158	0.453208	3.09925	0.323567
DCAF6	ENSG00000143164	-0.0176483	5.80958	0.969081
GPR161	ENSG00000143147	0.398144	5.42408	0.34463
TIPRL	ENSG00000143155	-0.0992621	5.21807	0.816494
SFT2D2	ENSG00000213064	-0.0254448	5.37311	0.956374
ATP1B1	ENSG00000143153	0.418305	4.03491	0.33461
NME7	ENSG00000143156	-0.314137	3.33884	0.493094
BLZF1	ENSG00000117475	-0.350664	4.21463	0.418381
SLC19A2	ENSG00000117479	-0.16984	4.44296	0.693965
AL021068.2	ENSG00000234604	0.112797	-1.2657	1
METTL18	ENSG00000171806	-0.317862	1.43011	0.605776
SCYL3	ENSG00000000457	0.15661	3.40098	0.73555
KIFAP3	ENSG00000075945	0.220582	4.36321	0.607667
GORAB	ENSG00000120370	-0.1878	3.40296	0.67966
PRRX1	ENSG00000116132	0.0892396	5.40702	0.834551
PRRC2C	ENSG00000117523	0.143709	7.63479	0.727836
VAMP4	ENSG00000117533	0.393321	3.41733	0.382577
METTL13	ENSG00000010165	-0.37833	4.57403	0.37646
DNM3OS	ENSG00000230630	-0.607879	3.14974	0.181794
MIR199A2	ENSG00000208024	0.666302	-1.90214	1
PIGC	ENSG00000135845	-0.763113	3.53157	0.0872793
SUCO	ENSG00000094975	0.0633291	5.62472	0.883508
TNFSF4	ENSG00000117586	-0.27623	2.1702	0.592633
PRDX6	ENSG00000117592	-0.26888	7.72694	0.514479
KLHL20	ENSG00000076321	0.206279	4.68367	0.633218
DARS2	ENSG00000117593	-0.388488	4.10423	0.370469
GAS5	ENSG00000234741	-0.0549504	7.14308	0.895139
RC3H1	ENSG00000135870	0.0560968	4.53491	0.895118
RABGAP1L	ENSG00000152061	0.302715	4.09956	0.485396
CACYBP	ENSG00000116161	-0.302262	4.67902	0.476925
MRPS14	ENSG00000120333	-0.22129	3.68406	0.61899
RFWD2	ENSG00000143207	-0.137301	4.73126	0.752351
AL359075.1	ENSG00000242193	0.316104	2.50907	0.526592
RASAL2-AS1	ENSG00000224687	0.529283	1.60624	0.318207
RASAL2	ENSG00000075391	-0.0872242	6.67801	0.834372
RALGPS2	ENSG00000116191	0.871851	6.34844	0.0367404
ANGPTL1	ENSG00000116194	-1.22322	2.25733	0.0124776
FAM20B	ENSG00000116199	0.547286	5.72503	0.190498
TOR3A	ENSG00000186283	0.0392972	4.26488	0.9328
ABL2	ENSG00000143322	0.203874	6.59277	0.623427
SOAT1	ENSG00000057252	0.0184254	5.7294	0.968921
TOR1AIP2	ENSG00000169905	0.328489	5.66509	0.432881
TOR1AIP1	ENSG00000143337	-0.0102505	5.47225	0.985167
CEP350	ENSG00000135837	0.367934	5.32703	0.381406
QSOX1	ENSG00000116260	0.282015	9.88047	0.492481
ACBD6	ENSG00000230124	-0.346702	5.22934	0.412198
XPR1	ENSG00000143324	0.348036	5.15964	0.408988
KIAA1614	ENSG00000135835	0.387116	3.68172	0.380803
STX6	ENSG00000135823	0.0446835	4.97995	0.922346
MR1	ENSG00000153029	0.964455	4.52546	0.0244756
IER5	ENSG00000162783	0.253098	6.46533	0.542325
GLUL	ENSG00000135821	0.217987	6.51813	0.599737
RNASEL	ENSG00000135828	-0.0267135	3.09598	0.981775
DHX9	ENSG00000135829	-0.755469	6.80186	0.0691153
LAMC1	ENSG00000135862	0.490027	10.4573	0.233545
LAMC1-AS1	ENSG00000224468	0.079746	1.33695	0.891378
SMG7	ENSG00000116698	-0.12943	5.87162	0.758049
ARPC5	ENSG00000162704	0.305023	7.59257	0.459805
RGL1	ENSG00000143344	-0.411565	5.5452	0.325995
TSEN15	ENSG00000198860	-0.466228	4.58488	0.273621
C1orf21	ENSG00000116667	1.14476	4.61448	0.0076475
EDEM3	ENSG00000116406	0.270504	6.16605	0.515999
FAM129A	ENSG00000135842	-0.0941492	6.67075	0.821327
RNF2	ENSG00000121481	0.0653142	4.10266	0.887988
TRMT1L	ENSG00000121486	-0.078718	3.73887	0.869283
SWT1	ENSG00000116668	-0.429216	2.45883	0.369048
AL136133.1	ENSG00000231084	-1.99094	-1.17348	0.0947168
AL356273.3	ENSG00000279838	-1.02808	1.46796	0.0529098
IVNS1ABP	ENSG00000116679	0.0198103	6.50008	0.963602
HMCN1	ENSG00000143341	-0.137163	7.52069	0.739961
AL133553.1	ENSG00000224691	-0.873198	-0.4351	0.345267
TPR	ENSG00000047410	-0.202728	7.12922	0.62412
C1orf27	ENSG00000157181	-0.24464	4.29698	0.576614
PTGS2	ENSG00000073756	-0.228435	6.70583	0.581785
PLA2G4A	ENSG00000116711	0.656424	2.75116	0.156381
AL136987.1	ENSG00000232498	0.114661	0.0149207	0.886005
RGS2	ENSG00000116741	-0.345463	6.36426	0.405809
UCHL5	ENSG00000116750	-0.236876	4.03849	0.588759
TROVE2	ENSG00000116747	0.188252	4.57034	0.661616
AL136370.1	ENSG00000272579	-0.77405	0.91784	0.189878
GLRX2	ENSG00000023572	-0.52965	2.71225	0.26366
CDC73	ENSG00000134371	-0.0838598	4.99637	0.842045
B3GALT2	ENSG00000162630	0.779363	2.88789	0.089194
KCNT2	ENSG00000162687	0.494474	3.50139	0.267482
CFH	ENSG00000000971	0.369317	7.33178	0.371362
CFHR1	ENSG00000244414	2.00281	3.35857	1.64849e-05
ASPM	ENSG00000066279	1.21603	4.30363	0.00517189
ZBTB41	ENSG00000177888	0.756494	4.69558	0.0767953
C1orf53	ENSG00000203724	-1.06064	0.23937	0.15953
NEK7	ENSG00000151414	-0.201761	7.60551	0.624965
ZNF281	ENSG00000162702	0.21936	5.48729	0.603009
DDX59	ENSG00000118197	-0.443467	3.29815	0.333844
CAMSAP2	ENSG00000118200	-0.0920306	5.93594	0.827196
RPL34P6	ENSG00000231333	1.30133	-1.26141	0.388527
TMEM9	ENSG00000116857	0.195269	5.86698	0.640868
PHLDA3	ENSG00000174307	-0.129321	7.11625	0.754969
CSRP1	ENSG00000159176	0.247591	10.3204	0.546608
NAV1	ENSG00000134369	0.0702621	7.63463	0.865293
IPO9	ENSG00000198700	-0.0445844	6.51763	0.915933
MIR6739	ENSG00000277681	-0.846468	-1.75359	0.704873
SHISA4	ENSG00000198892	0.455584	5.00938	0.281376
LMOD1	ENSG00000163431	1.0822	7.84397	0.00932971
TIMM17A	ENSG00000134375	-0.0850922	5.71846	0.841335
RNPEP	ENSG00000176393	0.252985	6.23413	0.543355
AC099676.1	ENSG00000273478	-0.337613	1.01	0.563725
ARL8A	ENSG00000143862	-0.422937	4.78888	0.322569
UBE2T	ENSG00000077152	-0.0877627	2.115	0.89829
PPP1R12B	ENSG00000077157	2.29792	6.95959	1.16073e-07
KDM5B	ENSG00000117139	0.159677	7.03002	0.69988
AC098934.3	ENSG00000235449	0.00862087	-0.119218	1
PCAT6	ENSG00000228288	1.47391	1.64618	0.00570156
RABIF	ENSG00000183155	-0.338615	2.94314	0.461568
KLHL12	ENSG00000117153	0.267831	5.06482	0.526575
HNRNPA1P59	ENSG00000230280	-1.51424	0.124201	0.0340354
Y_RNA	ENSG00000199471	4.14303	-2.4859	0.509804
ADIPOR1	ENSG00000159346	0.0443925	6.33625	0.916605
CYB5R1	ENSG00000159348	-0.0767449	5.40784	0.857377
TMEM183A	ENSG00000163444	0.0631382	5.52021	0.882032
PPFIA4	ENSG00000143847	2.16563	3.56737	3.03674e-06
ADORA1	ENSG00000163485	1.10886	4.37495	0.0104697
CHI3L1	ENSG00000133048	-0.590224	9.05513	0.152188
BTG2	ENSG00000159388	-0.195173	4.12991	0.660598
FMOD	ENSG00000122176	-0.30076	4.09088	0.490663
PRELP	ENSG00000188783	2.18235	2.68551	8.03022e-06
ATP2B4	ENSG00000058668	0.533077	8.37053	0.196119
SNORA77	ENSG00000221643	-0.104757	-0.986504	1
SNRPE	ENSG00000182004	-0.551539	3.97177	0.204143
ETNK2	ENSG00000143845	0.755633	1.98203	0.133915
PPP1R15B	ENSG00000158615	-0.404445	6.93295	0.32862
MDM4	ENSG00000198625	0.158795	5.1656	0.709557
TMEM81	ENSG00000174529	-0.193854	0.831236	0.784185
RBBP5	ENSG00000117222	0.0637452	3.90783	0.893464
DSTYK	ENSG00000133059	0.49153	5.20158	0.244026
TMCC2	ENSG00000133069	0.314584	2.81446	0.509892
NUAK2	ENSG00000163545	0.189769	4.30729	0.659141
RNU6-418P	ENSG00000206762	4.14303	-2.4859	0.509804
ELK4	ENSG00000158711	-0.119131	4.91008	0.779904
SLC45A3	ENSG00000158715	0.507065	2.18225	0.30157
NUCKS1	ENSG00000069275	0.224958	7.51853	0.585804
RAB29	ENSG00000117280	-0.179774	4.3536	0.683672
SLC41A1	ENSG00000133065	0.366428	6.04874	0.379219
RAB7B	ENSG00000276600	0.530033	2.7232	0.25314
SRGAP2	ENSG00000266028	0.410452	5.82555	0.326177
IKBKE	ENSG00000263528	-0.440086	4.87237	0.297834
RASSF5	ENSG00000266094	1.40073	3.93372	0.00152541
EIF2D	ENSG00000143486	0.0474935	5.58387	0.914313
DYRK3	ENSG00000143479	-0.36966	4.21428	0.393498
MAPKAPK2	ENSG00000162889	0.180069	6.50372	0.664934
PFKFB2	ENSG00000123836	-0.310305	3.76951	0.479997
YOD1	ENSG00000180667	0.445639	3.21507	0.328859
CD55	ENSG00000196352	-0.428633	5.5051	0.308511
CD46	ENSG00000117335	0.341887	7.6838	0.407278
PLXNA2	ENSG00000076356	0.916272	4.24702	0.034282
CAMK1G	ENSG00000008118	1.11265	1.66949	0.0352672
G0S2	ENSG00000123689	0.569824	2.17366	0.243746
DIEXF	ENSG00000117597	-0.231547	4.36719	0.594925
AC092017.2	ENSG00000234004	0.0822129	1.43541	0.897473
RCOR3	ENSG00000117625	-0.214678	5.10479	0.611438
TRAF5	ENSG00000082512	0.561483	6.153	0.177684
SLC30A1	ENSG00000170385	-0.425724	5.26043	0.313005
LPGAT1	ENSG00000123684	0.148766	6.07537	0.722078
INTS7	ENSG00000143493	-0.0742643	3.67336	0.875553
PPP2R5A	ENSG00000066027	0.418036	4.46772	0.327646
TMEM206	ENSG00000065600	0.0908568	2.82287	0.848469
NENF	ENSG00000117691	-0.0133255	3.94586	0.989574
ATF3	ENSG00000162772	0.0232577	6.46468	0.957011
BATF3	ENSG00000123685	1.02252	2.52004	0.0299976
NSL1	ENSG00000117697	-0.510196	3.38925	0.254826
TATDN3	ENSG00000203705	-0.430689	2.91361	0.351151
FLVCR1	ENSG00000162769	0.0890756	3.29878	0.857264
ANGEL2	ENSG00000174606	-0.0353774	4.19264	0.947037
RPS6KC1	ENSG00000136643	0.221239	5.16681	0.601821
SMYD2	ENSG00000143499	-0.256471	4.43147	0.551995
PTPN14	ENSG00000152104	0.596175	6.90291	0.150439
CENPF	ENSG00000117724	-0.68806	3.4104	0.121554
KCNK2	ENSG00000082482	0.304119	4.68385	0.473473
KCTD3	ENSG00000136636	0.532342	5.40744	0.204783
GPATCH2	ENSG00000092978	-0.174397	3.86877	0.699857
RRP15	ENSG00000067533	-0.65573	3.72219	0.1372
TGFB2-AS1	ENSG00000232480	0.386863	1.85101	0.452275
TGFB2	ENSG00000092969	0.424236	4.95144	0.317768
LYPLAL1	ENSG00000143353	-0.472546	3.3361	0.297817
RIMKLBP2	ENSG00000225920	-0.558755	0.347601	0.472815
EPRS	ENSG00000136628	-0.449918	7.56984	0.275941
BPNT1	ENSG00000162813	0.158373	3.60181	0.729947
IARS2	ENSG00000067704	-0.0247778	6.25639	0.95446
RAB3GAP2	ENSG00000118873	0.0630727	5.5689	0.882436
2024-03-02	ENSG00000117791	1.19652	2.02055	0.0171262
HLX	ENSG00000136630	-0.371726	2.65513	0.44636
DUSP10	ENSG00000143507	-1.01391	4.92615	0.0172569
TAF1A	ENSG00000143498	-0.270838	1.87676	0.619425
MIA3	ENSG00000154305	-0.202633	6.48143	0.625918
AIDA	ENSG00000186063	0.210543	5.58794	0.614998
BROX	ENSG00000162819	-0.0233543	4.80105	0.959027
AL392172.1	ENSG00000228106	-0.205356	0.782235	0.778282
DISP1	ENSG00000154309	0.199258	3.95534	0.649501
CAPN2	ENSG00000162909	-0.0590422	8.81599	0.886084
TP53BP2	ENSG00000143514	-0.139251	5.59181	0.741433
GTF2IP20	ENSG00000272645	-0.206009	2.37446	0.688805
AC138393.1	ENSG00000185495	-0.332474	2.77273	0.48017
AC138393.2	ENSG00000229930	1.3809	-1.61033	0.483528
FBXO28	ENSG00000143756	0.0273524	4.71983	0.956679
DEGS1	ENSG00000143753	-0.278749	6.96985	0.500635
NVL	ENSG00000143748	0.049039	3.83731	0.91061
CNIH4	ENSG00000143771	-0.0520995	5.01431	0.908971
WDR26	ENSG00000162923	0.182394	7.07893	0.659465
LBR	ENSG00000143815	0.199687	4.73769	0.639999
ENAH	ENSG00000154380	0.289522	7.99264	0.482351
SRP9	ENSG00000143742	-0.22887	6.41488	0.581968
EPHX1	ENSG00000143819	0.0619534	5.48806	0.886688
AL591895.1	ENSG00000242861	1.175	1.11023	0.0388178
TMEM63A	ENSG00000196187	0.46591	5.51957	0.265387
PYCR2	ENSG00000143811	-0.163352	4.3726	0.709257
SDE2	ENSG00000143751	0.021484	4.04586	0.970792
H3F3A	ENSG00000163041	-0.158565	6.64235	0.702758
ACBD3	ENSG00000182827	0.21107	6.27719	0.612208
PARP1	ENSG00000143799	0.265351	5.93172	0.525122
ITPKB	ENSG00000143772	0.349784	3.16143	0.454912
PSEN2	ENSG00000143801	-0.889059	3.61147	0.0457762
COQ8A	ENSG00000163050	-0.589394	3.61995	0.185517
CDC42BPA	ENSG00000143776	0.055674	7.2994	0.893559
SNAP47	ENSG00000143740	0.297174	4.65839	0.485495
JMJD4	ENSG00000081692	0.229821	2.78213	0.634357
ARF1	ENSG00000143761	-0.0768421	8.7555	0.85201
C1orf35	ENSG00000143793	-0.176595	3.2042	0.71689
MRPL55	ENSG00000162910	0.21363	4.06748	0.621191
GUK1	ENSG00000143774	-0.0677324	6.47497	0.871751
OBSCN	ENSG00000154358	0.504617	5.60074	0.228212
AL353593.3	ENSG00000270110	0.564933	0.546947	0.38768
TRIM11	ENSG00000154370	-0.0590455	4.68028	0.898619
RNF187	ENSG00000168159	-0.69389	2.43134	0.147818
RNA5SP18	ENSG00000212237	5.6725	-1.74433	0.0409646
RAB4A	ENSG00000168118	-0.0276193	4.90898	0.956491
CCSAP	ENSG00000154429	0.207877	3.08494	0.661896
NUP133	ENSG00000069248	0.361707	5.29983	0.389446
ABCB10	ENSG00000135776	-0.0862109	4.13193	0.844642
RNA5SP78	ENSG00000201492	-0.858729	-1.37592	0.54333
TAF5L	ENSG00000135801	-0.17871	4.53232	0.678559
URB2	ENSG00000135763	-0.721814	3.23158	0.111749
GALNT2	ENSG00000143641	0.548428	8.59089	0.183444
COG2	ENSG00000135775	-0.0747387	4.34928	0.865555
C1orf198	ENSG00000119280	0.416511	8.65408	0.311776
TTC13	ENSG00000143643	-0.0898608	4.30204	0.845143
ARV1	ENSG00000173409	0.0770904	3.49396	0.874272
FAM89A	ENSG00000182118	0.2781	3.10127	0.553139
C1orf131	ENSG00000143633	-0.450646	2.97957	0.320839
GNPAT	ENSG00000116906	0.137957	5.26681	0.744339
EXOC8	ENSG00000116903	0.14527	3.54384	0.745604
SPRTN	ENSG00000010072	-0.175699	3.16187	0.710142
EGLN1	ENSG00000135766	0.149839	5.03138	0.725237
AL445524.1	ENSG00000233461	0.181674	0.482917	0.824055
TSNAX	ENSG00000116918	-0.0195333	3.8149	0.977246
SIPA1L2	ENSG00000116991	0.1066	3.28155	0.82402
NTPCR	ENSG00000135778	-0.26244	4.39327	0.548075
PCNX2	ENSG00000135749	0.0450576	4.74756	0.9212
KCNK1	ENSG00000135750	0.254579	2.1496	0.615186
COA6	ENSG00000168275	-0.533561	3.06718	0.250413
TARBP1	ENSG00000059588	0.423573	5.39107	0.311591
IRF2BP2	ENSG00000168264	-0.12389	6.43879	0.76641
TOMM20	ENSG00000173726	0.00658992	7.31977	0.988272
SNORA14B	ENSG00000207181	1.98193	-1.89978	0.398816
ARID4B	ENSG00000054267	-0.0627728	5.0141	0.888858
GGPS1	ENSG00000152904	-0.0673157	4.6412	0.876549
TBCE	ENSG00000116957	-0.184959	4.03423	0.675231
LYST	ENSG00000143669	0.202614	4.6886	0.64004
NID1	ENSG00000116962	0.493897	8.43753	0.230817
GPR137B	ENSG00000077585	-0.234225	4.112	0.589977
LGALS8	ENSG00000116977	-0.0909559	5.50312	0.830676
AL359921.2	ENSG00000273058	-0.00980837	-0.318661	1
HEATR1	ENSG00000119285	-0.0799818	5.41381	0.850367
MTR	ENSG00000116984	0.752745	5.51741	0.0726866
FH	ENSG00000091483	-0.188419	5.69351	0.654353
OPN3	ENSG00000054277	0.385652	3.45696	0.383724
CHML	ENSG00000203668	-0.865552	4.58837	0.0427784
ZBTB18	ENSG00000179456	0.443514	5.00245	0.293893
ADSS	ENSG00000035687	-0.183655	5.52287	0.662835
DESI2	ENSG00000121644	0.0700024	5.77259	0.867782
HNRNPU	ENSG00000153187	-0.278922	8.44479	0.498059
SMYD3	ENSG00000185420	-0.339977	4.88583	0.42372
TFB2M	ENSG00000162851	-0.194126	3.68455	0.663567
CNST	ENSG00000162852	0.558474	5.63863	0.181986
AL591623.2	ENSG00000228955	-1.76704	-1.90686	0.398816
SCCPDH	ENSG00000143653	-0.515174	4.72418	0.224127
AC113174.1	ENSG00000235386	-0.288985	-1.61486	1
AHCTF1	ENSG00000153207	-0.0733471	5.73325	0.861182
ZNF669	ENSG00000188295	0.928519	0.891096	0.12588
AL390728.6	ENSG00000259865	0.545625	0.604588	0.402999
AL390728.4	ENSG00000227671	-0.182705	3.96755	0.680614
RNA5SP82	ENSG00000252516	0.425614	-1.37156	1
ZNF496	ENSG00000162714	0.488023	5.73366	0.24395
SH3BP5L	ENSG00000175137	0.206722	5.20548	0.623211
ZNF672	ENSG00000171161	0.0248407	4.24891	0.957525
ZNF692	ENSG00000171163	-0.0527216	4.28308	0.917046
PGBD2	ENSG00000185220	-0.42778	1.85108	0.419128
SH3YL1	ENSG00000035115	0.127834	4.81466	0.771085
ACP1	ENSG00000143727	-0.146867	5.88075	0.726299
TMEM18	ENSG00000151353	-0.664096	3.99665	0.12536
PXDN	ENSG00000130508	-0.0692752	10.614	0.866033
EIPR1	ENSG00000032389	-0.300885	3.96265	0.492357
TRAPPC12	ENSG00000171853	-0.0467345	4.33503	0.919884
ADI1	ENSG00000182551	-0.349219	4.83874	0.413273
RNASEH1	ENSG00000171865	-0.0251332	4.33756	0.95995
RNASEH1-AS1	ENSG00000234171	0.046764	1.38657	0.947146
RPS7	ENSG00000171863	0.0124444	8.62221	0.976258
SOX11	ENSG00000176887	-1.0366	4.62542	0.0159555
ID2	ENSG00000115738	0.401623	6.08983	0.334935
KIDINS220	ENSG00000134313	-0.289855	6.55427	0.484921
MBOAT2	ENSG00000143797	0.645632	5.41465	0.124611
ASAP2	ENSG00000151693	0.179815	5.17911	0.674238
ITGB1BP1	ENSG00000119185	0.023058	5.32036	0.958915
CPSF3	ENSG00000119203	-0.183418	4.6645	0.669574
IAH1	ENSG00000134330	0.313786	4.95352	0.457552
ADAM17	ENSG00000151694	-0.10854	5.21789	0.799363
YWHAQ	ENSG00000134308	0.0206039	7.69201	0.960872
TAF1B	ENSG00000115750	0.202231	3.00681	0.663046
AC104794.2	ENSG00000260077	0.583502	1.53433	0.269145
KLF11	ENSG00000172059	0.535451	3.90785	0.220371
CYS1	ENSG00000205795	1.44488	1.35357	0.00948574
HPCAL1	ENSG00000115756	0.575278	4.42713	0.178764
ODC1	ENSG00000115758	-0.504294	6.66865	0.224154
SNORA80B	ENSG00000206633	-1.43346	-1.07917	0.191851
NOL10	ENSG00000115761	-0.290529	4.50789	0.501346
PDIA6	ENSG00000143870	-0.0697122	8.47503	0.86577
PQLC3	ENSG00000162976	-0.0807159	3.21512	0.865786
ROCK2	ENSG00000134318	0.608348	6.09696	0.144517
E2F6	ENSG00000169016	-0.0517382	3.9997	0.909716
LPIN1	ENSG00000134324	0.429621	5.69809	0.305706
TRIB2	ENSG00000071575	0.568799	3.49122	0.200732
MIR3125	ENSG00000264370	4.14303	-2.4859	0.509804
NBAS	ENSG00000151779	0.4262	5.99148	0.306677
DDX1	ENSG00000079785	-0.246933	6.455	0.552305
SMC6	ENSG00000163029	0.398041	5.6347	0.34325
KCNS3	ENSG00000170745	-0.543289	3.04657	0.232774
RDH14	ENSG00000240857	-0.26269	3.27064	0.567462
OSR1	ENSG00000143867	1.15103	4.87987	0.00698947
TTC32	ENSG00000183891	0.394922	1.93235	0.445282
WDR35	ENSG00000118965	-0.366821	3.43572	0.408266
MATN3	ENSG00000132031	-0.0484346	2.4176	0.943471
LAPTM4A	ENSG00000068697	-0.101834	7.91531	0.805174
SDC1	ENSG00000115884	0.253584	6.39759	0.541782
PUM2	ENSG00000055917	-0.0952942	5.85391	0.821355
RHOB	ENSG00000143878	0.211976	7.8248	0.607213
HS1BP3	ENSG00000118960	-0.43638	5.02018	0.302646
LDAH	ENSG00000118961	-0.0937888	3.85258	0.834873
KLHL29	ENSG00000119771	0.230825	5.00911	0.58771
ATAD2B	ENSG00000119778	0.183312	3.526	0.691586
UBXN2A	ENSG00000173960	0.226526	3.81331	0.607205
WDCP	ENSG00000163026	0.46051	2.55606	0.346187
FKBP1B	ENSG00000119782	0.0124667	0.83355	1
SF3B6	ENSG00000115128	-0.115876	5.18638	0.78624
TP53I3	ENSG00000115129	-0.336611	5.1798	0.425404
ITSN2	ENSG00000198399	-0.100798	4.85975	0.815749
NCOA1	ENSG00000084676	-0.104745	4.73188	0.811472
PTRHD1	ENSG00000184924	-0.369377	2.70178	0.442104
CENPO	ENSG00000138092	-0.41042	2.62718	0.382872
ADCY3	ENSG00000138031	-0.0057278	5.23133	0.995631
DNMT3A	ENSG00000119772	0.0344734	5.47601	0.937228
DTNB	ENSG00000138101	-0.169955	2.81241	0.720491
ASXL2	ENSG00000143970	-0.062573	4.99409	0.887444
KIF3C	ENSG00000084731	0.581423	5.43657	0.166206
RAB10	ENSG00000084733	-0.0471473	6.60814	0.910863
GAREM2	ENSG00000157833	0.0177592	3.82166	0.977338
HADHA	ENSG00000084754	0.177232	7.19477	0.668329
HADHB	ENSG00000138029	0.0957779	6.6999	0.818181
SELENOI	ENSG00000138018	-0.0991358	4.26896	0.825044
SLC35F6	ENSG00000213699	-0.366587	5.21869	0.383628
MAPRE3	ENSG00000084764	-0.00119743	4.68971	1
TMEM214	ENSG00000119777	-0.0737554	7.23709	0.859064
AGBL5	ENSG00000084693	0.136598	4.84352	0.748172
AGBL5-IT1	ENSG00000229122	0.114033	-0.613377	1
AC013403.2	ENSG00000272148	-1.16328	0.046739	0.108539
OST4	ENSG00000228474	0.220907	6.451	0.595057
EMILIN1	ENSG00000138080	0.670209	9.79879	0.104068
CGREF1	ENSG00000138028	0.565264	2.12494	0.267858
PREB	ENSG00000138073	-0.212785	5.56714	0.613026
SLC5A6	ENSG00000138074	-0.540799	4.13092	0.208858
ATRAID	ENSG00000138085	0.0632615	6.29954	0.880608
CAD	ENSG00000084774	-0.240073	6.27771	0.56407
MPV17	ENSG00000115204	-0.0774453	5.75076	0.856798
GTF3C2	ENSG00000115207	0.0409458	5.06302	0.926541
AC074117.1	ENSG00000234072	-0.2499	1.66449	0.65363
EIF2B4	ENSG00000115211	-0.240867	4.94011	0.574266
SNX17	ENSG00000115234	0.0105671	6.89827	0.980952
ZNF513	ENSG00000163795	-0.274106	4.38081	0.524794
PPM1G	ENSG00000115241	-0.309806	6.16661	0.456844
NRBP1	ENSG00000115216	-0.367816	6.70148	0.374924
IFT172	ENSG00000138002	-0.0426358	4.92852	0.92495
FNDC4	ENSG00000115226	0.115546	3.62905	0.808807
ZNF512	ENSG00000243943	-0.319575	3.62813	0.466837
GPN1	ENSG00000198522	-0.217028	4.16327	0.619098
SUPT7L	ENSG00000119760	-0.409349	5.71788	0.327817
SLC4A1AP	ENSG00000163798	-0.187548	4.79946	0.65904
MRPL33	ENSG00000243147	0.18034	3.42159	0.697332
BABAM2	ENSG00000158019	0.0781095	4.2041	0.869109
MIR4263	ENSG00000265321	0.512093	-1.6126	1
FOSL2	ENSG00000075426	0.325463	7.62756	0.430247
PPP1CB	ENSG00000213639	0.26423	6.75272	0.52377
TRMT61B	ENSG00000171103	0.22393	3.00719	0.62822
WDR43	ENSG00000163811	-0.557728	5.05166	0.187678
CLIP4	ENSG00000115295	0.0273155	5.45355	0.951208
YPEL5	ENSG00000119801	0.166076	6.32372	0.690212
LBH	ENSG00000213626	0.409792	5.46584	0.32943
LCLAT1	ENSG00000172954	0.312602	2.91483	0.501625
EHD3	ENSG00000013016	0.012434	5.16397	0.981712
MEMO1	ENSG00000162959	0.386883	2.46413	0.429544
DPY30	ENSG00000162961	0.00337331	4.2642	1
SPAST	ENSG00000021574	-0.265897	3.59063	0.550731
SLC30A6	ENSG00000152683	-0.000151011	4.57397	1
YIPF4	ENSG00000119820	-0.104625	4.96617	0.808198
BIRC6	ENSG00000115760	0.318096	6.67047	0.442935
TTC27	ENSG00000018699	-0.104114	3.93862	0.823513
LTBP1	ENSG00000049323	-0.070289	7.41171	0.865475
FAM98A	ENSG00000119812	-0.0590213	6.45917	0.888396
CRIM1	ENSG00000150938	0.526051	9.81021	0.201272
FEZ2	ENSG00000171055	0.182689	5.0619	0.671217
AC007382.1	ENSG00000279519	0.013696	1.40243	1
STRN	ENSG00000115808	-0.21955	4.62626	0.608025
HEATR5B	ENSG00000008869	-0.259312	4.81032	0.544196
GPATCH11	ENSG00000152133	0.414191	3.22839	0.353441
EIF2AK2	ENSG00000055332	0.197136	5.60279	0.639839
CEBPZOS	ENSG00000218739	0.0336345	4.32161	0.943305
CEBPZ	ENSG00000115816	-0.029915	4.49201	0.956705
NDUFAF7	ENSG00000003509	0.00700192	3.91817	1
PRKD3	ENSG00000115825	0.239123	5.8207	0.567283
QPCT	ENSG00000115828	-0.187781	5.67273	0.652625
CDC42EP3	ENSG00000163171	0.0981319	8.59947	0.81167
CYP1B1	ENSG00000138061	0.0642993	6.72017	0.877824
ATL2	ENSG00000119787	0.00439657	4.15782	1
RPLP0P6	ENSG00000213553	-0.063598	2.14471	0.933316
HNRNPLL	ENSG00000143889	0.191848	5.13112	0.651521
GALM	ENSG00000143891	0.0388329	3.49707	0.943799
SRSF7	ENSG00000115875	-0.0155099	6.06192	0.972652
GEMIN6	ENSG00000152147	-0.428087	2.41957	0.375929
DHX57	ENSG00000163214	-0.362765	4.54358	0.394596
MORN2	ENSG00000188010	-0.132912	2.73808	0.794953
SOS1	ENSG00000115904	0.249837	5.59049	0.55356
MAP4K3	ENSG00000011566	-0.233192	5.72853	0.576613
SNORA67	ENSG00000252473	-1.15928	-1.61713	0.483528
AC007388.1	ENSG00000231312	0.760896	3.0739	0.0955834
TMEM178A	ENSG00000152154	1.25915	2.22128	0.010475
THUMPD2	ENSG00000138050	0.0952121	3.0981	0.837076
SLC8A1	ENSG00000183023	0.963336	4.80239	0.0240482
PKDCC	ENSG00000162878	0.251165	4.16002	0.563671
EML4	ENSG00000143924	0.0711425	6.19821	0.865853
COX7A2L	ENSG00000115944	0.00885068	6.39989	0.984879
MTA3	ENSG00000057935	0.182563	5.00818	0.668736
RNU6-137P	ENSG00000200550	0.108819	-2.07329	1
ZFP36L2	ENSG00000152518	0.468322	6.09112	0.260917
AC010883.1	ENSG00000234936	2.77116	-1.48148	0.0922987
THADA	ENSG00000115970	-0.225328	4.18911	0.601755
DYNC2LI1	ENSG00000138036	-0.456327	3.49586	0.304112
LRPPRC	ENSG00000138095	-0.0846589	6.61047	0.839353
RNU6-1048P	ENSG00000200924	-4.03421	-2.49093	0.509804
PPM1B	ENSG00000138032	-0.264194	4.79186	0.539116
PREPL	ENSG00000138078	-0.0812158	5.91219	0.84762
CAMKMT	ENSG00000143919	-0.667765	2.55971	0.16015
SRBD1	ENSG00000068784	0.317019	3.37509	0.491602
PRKCE	ENSG00000171132	-0.502832	3.78781	0.25507
EPAS1	ENSG00000116016	-0.414839	9.74604	0.313118
RHOQ	ENSG00000119729	-0.241564	6.10543	0.562344
AC018682.1	ENSG00000250116	-1.08382	0.47095	0.114153
PIGF	ENSG00000151665	0.115529	3.32944	0.798357
CRIPT	ENSG00000119878	-0.147299	3.20934	0.765965
SOCS5	ENSG00000171150	0.464635	5.58568	0.2663
MCFD2	ENSG00000180398	-0.246061	8.00661	0.550449
TTC7A	ENSG00000068724	0.542752	5.91077	0.193138
CALM2	ENSG00000143933	-0.436359	9.68767	0.28878
MSH2	ENSG00000095002	-0.434313	3.6261	0.329816
AC079250.1	ENSG00000230979	0.114963	0.51264	0.912974
MSH6	ENSG00000116062	0.387379	5.54967	0.355029
FBXO11	ENSG00000138081	0.0166615	4.92825	0.973137
AC079807.1	ENSG00000233230	0.115102	0.834707	0.92729
FOXN2	ENSG00000170802	-0.492019	2.9626	0.280329
PPP1R21	ENSG00000162869	0.255168	4.76744	0.552198
STON1	ENSG00000243244	0.300214	6.16962	0.470859
ERLEC1	ENSG00000068912	-0.0105935	6.0446	0.98214
MIR3682	ENSG00000265452	0.666302	-1.90214	1
GPR75	ENSG00000119737	-0.468085	1.54955	0.399688
PSME4	ENSG00000068878	0.0112103	6.51217	0.980171
SPTBN1	ENSG00000115306	0.414998	9.28772	0.313127
AC093110.1	ENSG00000238018	0.19049	1.8241	0.759194
RTN4	ENSG00000115310	-0.419055	8.86386	0.308695
CLHC1	ENSG00000162994	0.622455	2.90855	0.175941
AC012358.1	ENSG00000203327	0.872663	-0.112702	0.289176
RPS27A	ENSG00000143947	0.0610494	8.11261	0.88257
MTIF2	ENSG00000085760	-0.33805	4.17999	0.439942
CCDC88A	ENSG00000115355	0.484721	5.7336	0.245294
CFAP36	ENSG00000163001	-0.267762	4.70607	0.530733
PPP4R3B	ENSG00000275052	-0.160509	5.58339	0.704512
SNORA12	ENSG00000212175	-0.446489	-1.9045	1
PNPT1	ENSG00000138035	-0.235903	4.24179	0.584119
EFEMP1	ENSG00000115380	0.451253	7.80467	0.274145
AC007743.1	ENSG00000233251	-1.26681	2.66851	0.00799435
CCDC85A	ENSG00000055813	-0.469179	4.40762	0.276233
VRK2	ENSG00000028116	0.123795	3.39225	0.791743
FANCL	ENSG00000115392	-0.21602	2.97811	0.656364
PAPOLG	ENSG00000115421	0.469323	3.37776	0.293134
PEX13	ENSG00000162928	0.132451	4.67556	0.75524
AC016747.1	ENSG00000212978	0.451766	1.98854	0.38035
AHSA2	ENSG00000173209	0.336589	6.26685	0.418322
USP34	ENSG00000115464	0.500323	6.75414	0.227523
XPO1	ENSG00000082898	0.0811666	7.15062	0.845063
CCT4	ENSG00000115484	0.0572011	7.18475	0.890757
COMMD1	ENSG00000173163	-0.367447	3.77161	0.402113
B3GNT2	ENSG00000170340	-0.250857	4.25499	0.558489
EHBP1	ENSG00000115504	0.542953	5.61298	0.195902
MDH1	ENSG00000014641	-0.298935	6.74241	0.470734
AC016734.1	ENSG00000228305	-0.0900296	-0.0741865	1
UGP2	ENSG00000169764	-0.363316	6.95727	0.380065
ACA59	ENSG00000251775	-0.200702	-1.37374	1
VPS54	ENSG00000143952	0.07536	4.90525	0.864214
PELI1	ENSG00000197329	-0.330868	3.25613	0.470456
LGALSL	ENSG00000119862	0.22532	2.67172	0.651201
AFTPH	ENSG00000119844	0.0634671	4.18745	0.893969
MIR4434	ENSG00000283204	0.108819	-2.07329	1
SERTAD2	ENSG00000179833	0.551926	5.99796	0.185411
SLC1A4	ENSG00000115902	-0.696743	5.15893	0.0987543
CEP68	ENSG00000011523	0.271027	3.68298	0.543333
RAB1A	ENSG00000138069	-0.0109686	7.95421	0.979401
ACTR2	ENSG00000138071	0.131215	8.61027	0.749905
SPRED2	ENSG00000198369	-0.373353	5.3435	0.372697
MEIS1	ENSG00000143995	0.783012	6.11217	0.060788
ETAA1	ENSG00000143971	0.252524	4.0936	0.561297
C1D	ENSG00000197223	-0.0826621	3.61153	0.870395
PNO1	ENSG00000115946	-0.962974	3.40993	0.0313972
PPP3R1	ENSG00000221823	-0.238104	4.89351	0.576006
CNRIP1	ENSG00000119865	0.0205207	4.81108	0.965131
ANTXR1	ENSG00000169604	-0.101267	8.45588	0.805848
GFPT1	ENSG00000198380	0.0346129	7.30252	0.934095
Y_RNA	ENSG00000252250	-4.03421	-2.49093	0.509804
NFU1	ENSG00000169599	-0.182459	3.70784	0.679584
AAK1	ENSG00000115977	0.048387	6.18663	0.909262
ANXA4	ENSG00000196975	-0.414609	6.04645	0.319821
GMCL1	ENSG00000087338	0.201246	3.92175	0.642096
SNRNP27	ENSG00000124380	-0.203872	4.04428	0.641853
MXD1	ENSG00000059728	-0.401877	3.72984	0.364368
PCBP1	ENSG00000169564	-0.226096	7.1397	0.584618
C2orf42	ENSG00000115998	-0.121257	2.47146	0.810543
TIA1	ENSG00000116001	-0.0240627	5.99885	0.956344
PCYOX1	ENSG00000116005	0.526812	6.89579	0.203586
SNRPG	ENSG00000143977	-0.58515	3.67097	0.184463
FAM136A	ENSG00000035141	-0.529151	4.86927	0.213715
TEX261	ENSG00000144043	-0.511377	6.02645	0.220049
NAGK	ENSG00000124357	-0.616134	6.45763	0.138419
MCEE	ENSG00000124370	0.662572	3.27791	0.140046
MPHOSPH10	ENSG00000124383	-0.59495	4.55025	0.162365
ZNF638	ENSG00000075292	0.176476	6.49891	0.671267
AC007878.1	ENSG00000281195	-0.183151	0.87863	0.789772
DYSF	ENSG00000135636	-0.145377	3.05844	0.760324
EXOC6B	ENSG00000144036	0.0663398	5.05321	0.882
SPR	ENSG00000116096	-0.463729	3.74153	0.285415
SFXN5	ENSG00000144040	-0.579036	3.97399	0.182434
RAB11FIP5	ENSG00000135631	0.121723	6.39754	0.770489
SMYD5	ENSG00000135632	0.0706222	4.52405	0.880337
PRADC1	ENSG00000135617	-0.205992	2.29832	0.702483
CCT7	ENSG00000135624	-0.314519	7.43601	0.446255
FBXO41	ENSG00000163013	0.317939	3.82412	0.468566
ALMS1	ENSG00000116127	-0.0659595	3.97242	0.887767
TPRKB	ENSG00000144034	0.0578281	2.59989	0.924799
DUSP11	ENSG00000144048	-0.147356	4.14778	0.740534
STAMBP	ENSG00000124356	0.168138	5.10594	0.693637
ACTG2	ENSG00000163017	-0.0469593	9.79542	0.909102
DGUOK	ENSG00000114956	-0.167152	4.95674	0.691785
DGUOK-AS1	ENSG00000237883	-1.19019	-0.436877	0.183239
AC073046.1	ENSG00000235499	2.36389	-1.06472	0.0623388
TET3	ENSG00000187605	-0.202511	4.94778	0.63666
BOLA3	ENSG00000163170	-0.2464	1.78097	0.637974
BOLA3-AS1	ENSG00000225439	-0.106571	1.99101	0.853071
MOB1A	ENSG00000114978	0.203904	6.43883	0.623844
MTHFD2	ENSG00000065911	-0.953931	7.156	0.0219139
DCTN1	ENSG00000204843	-0.0976391	7.581	0.813398
WDR54	ENSG00000005448	0.439128	3.36054	0.324716
RTKN	ENSG00000114993	-0.345171	4.21702	0.425461
WBP1	ENSG00000239779	0.120383	4.16478	0.78645
MOGS	ENSG00000115275	0.0826026	6.62772	0.843186
MRPL53	ENSG00000204822	-0.486475	0.986943	0.402789
CCDC142	ENSG00000135637	0.000138543	3.05064	1
TTC31	ENSG00000115282	0.0744842	4.39145	0.869226
LBX2-AS1	ENSG00000257702	-0.241519	2.15163	0.646996
PCGF1	ENSG00000115289	-0.326168	3.48677	0.46764
AUP1	ENSG00000115307	-0.691966	5.6455	0.0983814
HTRA2	ENSG00000115317	-0.159604	3.6885	0.721529
LOXL3	ENSG00000115318	0.552735	6.81963	0.182485
DOK1	ENSG00000115325	0.200981	4.18766	0.640523
SEMA4F	ENSG00000135622	0.346292	3.24093	0.43992
AC019069.1	ENSG00000272711	-0.356213	0.477599	0.65627
HK2	ENSG00000159399	-0.00911794	4.82268	0.988469
POLE4	ENSG00000115350	-0.711004	3.35716	0.112954
EVA1A	ENSG00000115363	-0.445734	4.68796	0.292734
MRPL19	ENSG00000115364	-0.0646701	4.36201	0.882244
GCFC2	ENSG00000005436	0.0558615	3.12716	0.910796
AC005034.3	ENSG00000270696	0.441107	2.20947	0.372377
AC005034.5	ENSG00000271452	1.93617	-0.306571	0.0245106
SUCLG1	ENSG00000163541	0.104822	5.3198	0.808493
TRABD2A	ENSG00000186854	0.0160696	3.50045	0.985974
TMSB10	ENSG00000034510	-0.172767	9.71174	0.6741
KCMF1	ENSG00000176407	-0.00427225	5.72895	0.993783
TCF7L1	ENSG00000152284	0.00153427	5.76102	1
AC093162.2	ENSG00000246575	0.935199	1.8824	0.0635361
TGOLN2	ENSG00000152291	0.245832	8.31256	0.550485
RETSAT	ENSG00000042445	-0.0588507	5.67859	0.890878
ELMOD3	ENSG00000115459	-0.201142	3.93405	0.644598
Y_RNA	ENSG00000202382	-1.82358	-1.27211	0.143685
AC062037.2	ENSG00000273196	-0.811751	-2.26721	1
CAPG	ENSG00000042493	0.263155	5.29246	0.534674
MAT2A	ENSG00000168906	-0.371913	7.64731	0.367472
GGCX	ENSG00000115486	0.0287958	5.81811	0.947644
VAMP5	ENSG00000168899	0.523377	4.42014	0.221093
RNF181	ENSG00000168894	-0.138605	4.92949	0.746598
TMEM150A	ENSG00000168890	-0.293909	4.21567	0.498194
USP39	ENSG00000168883	0.0965187	5.17394	0.8198
C2orf68	ENSG00000168887	0.718121	4.19477	0.0948528
ATOH8	ENSG00000168874	0.0549607	3.83442	0.899291
MIR6071	ENSG00000278783	4.14303	-2.4859	0.509804
ST3GAL5	ENSG00000115525	-0.0346142	4.36881	0.937301
POLR1A	ENSG00000068654	-0.269049	6.0193	0.518977
PTCD3	ENSG00000132300	-0.000377339	5.32312	1
SNORD94	ENSG00000208772	-0.782246	-0.323837	0.37526
IMMT	ENSG00000132305	-0.0471523	6.40789	0.911206
MRPL35	ENSG00000132313	-0.124908	4.07649	0.783245
KDM3A	ENSG00000115548	-0.165582	5.49031	0.696193
CHMP3	ENSG00000115561	-0.237037	5.00013	0.576151
RNF103	ENSG00000239305	0.233982	4.54566	0.582068
RMND5A	ENSG00000153561	0.0308464	4.27361	0.949875
AC125232.1	ENSG00000231259	0.298468	1.95332	0.572786
AC125232.2	ENSG00000266931	-0.146306	0.134712	1
LINC01943	ENSG00000280721	0.0124667	0.83355	1
CYTOR	ENSG00000222041	-0.241373	3.99889	0.587434
MIR4435-1	ENSG00000265507	-4.03421	-2.49093	0.509804
AC093616.1	ENSG00000234231	-0.0263815	3.19752	0.965891
RNU2-63P	ENSG00000222724	5.10161	-2.06847	0.139845
KRCC1	ENSG00000172086	0.044143	4.96903	0.92177
THNSL2	ENSG00000144115	-0.190639	4.21758	0.662549
EIF2AK3	ENSG00000172071	0.224548	4.19046	0.601755
RPIA	ENSG00000153574	-0.190904	3.34941	0.66965
AC006453.2	ENSG00000283196	-0.0639768	3.5327	0.890597
AC233266.1	ENSG00000230964	-1.36706	-2.07569	0.63929
AC116050.1	ENSG00000143429	-0.260696	2.97735	0.586381
MRPS5	ENSG00000144029	0.166548	5.15011	0.693699
ZNF514	ENSG00000144026	-0.0561252	4.05218	0.912828
ZNF2	ENSG00000275111	0.426499	2.50327	0.383063
FAHD2A	ENSG00000115042	0.476213	4.59373	0.265311
LINC00342	ENSG00000232931	0.135321	4.12871	0.763969
FAHD2CP	ENSG00000231584	0.318025	1.15928	0.598871
DUSP2	ENSG00000158050	-0.787678	2.03393	0.112118
STARD7	ENSG00000084090	0.0703542	5.6266	0.870456
STARD7-AS1	ENSG00000204685	-0.57087	1.53358	0.301314
TMEM127	ENSG00000135956	-0.483111	6.17157	0.245916
CIAO1	ENSG00000144021	-0.224811	5.93963	0.590612
SNRNP200	ENSG00000144028	-0.0871291	7.77575	0.833071
ARID5A	ENSG00000196843	-0.16797	2.6242	0.733729
KANSL3	ENSG00000114982	0.347964	6.17295	0.403156
LMAN2L	ENSG00000114988	-0.284507	4.75242	0.503534
CNNM4	ENSG00000158158	0.242674	3.77015	0.576414
CNNM3	ENSG00000168763	-0.183831	3.60269	0.681034
SEMA4C	ENSG00000168758	-0.0724294	5.84694	0.864429
FAHD2B	ENSG00000144199	0.689312	2.80215	0.13141
ANKRD36	ENSG00000135976	-0.223993	3.58427	0.617566
AC092683.1	ENSG00000230606	-0.791745	2.09472	0.113436
COX5B	ENSG00000135940	-0.25421	5.09781	0.548153
ACTR1B	ENSG00000115073	0.502343	5.71763	0.229196
TMEM131	ENSG00000075568	-0.00343649	6.43524	0.995298
INPP4A	ENSG00000040933	0.187086	5.07733	0.656707
COA5	ENSG00000183513	-0.32998	3.61756	0.453807
UNC50	ENSG00000115446	-0.280823	4.75407	0.508876
MITD1	ENSG00000158411	-0.21272	3.57016	0.638067
MRPL30	ENSG00000185414	-0.0026454	3.63728	1
TXNDC9	ENSG00000115514	-0.449622	4.6696	0.290358
EIF5B	ENSG00000158417	-0.19827	6.50993	0.633315
REV1	ENSG00000135945	-0.058019	5.03131	0.895105
AC018690.1	ENSG00000273306	-0.810521	0.0898119	0.334166
CHST10	ENSG00000115526	-0.483547	3.62868	0.277058
PDCL3	ENSG00000115539	-1.31234	3.6726	0.0032443
NPAS2	ENSG00000170485	-0.115354	5.67162	0.782755
RPL31	ENSG00000071082	0.110293	8.33413	0.788971
CNOT11	ENSG00000158435	0.0883221	4.98079	0.840317
RNF149	ENSG00000163162	-0.247259	4.8919	0.561524
RFX8	ENSG00000196460	0.315763	2.14082	0.526968
MAP4K4	ENSG00000071054	0.055106	8.18338	0.893947
IL1R1	ENSG00000115594	0.957235	6.77107	0.0216829
MFSD9	ENSG00000135953	0.512669	2.8718	0.265094
MRPS9	ENSG00000135972	-0.122238	4.03017	0.785686
TGFBRAP1	ENSG00000135966	-0.645979	6.09026	0.121443
C2orf49	ENSG00000135974	0.256487	4.42521	0.556754
FHL2	ENSG00000115641	-0.0718555	8.31875	0.861756
AC108058.1	ENSG00000238273	-0.282584	2.62233	0.575699
NCK2	ENSG00000071051	-0.0419148	4.88282	0.922587
UXS1	ENSG00000115652	-0.15346	5.54376	0.716501
ST6GAL2	ENSG00000144057	-1.40309	2.81169	0.00306215
GCC2	ENSG00000135968	0.0585424	5.39933	0.895094
LIMS1	ENSG00000169756	-0.197638	6.7368	0.633766
LIMS1-AS1	ENSG00000228763	0.498431	0.0180465	0.471995
RANBP2	ENSG00000153201	0.061605	6.57609	0.883217
SH3RF3-AS1	ENSG00000259863	0.46829	1.9221	0.360774
SH3RF3	ENSG00000172985	0.068098	4.85856	0.876691
2024-09-10	ENSG00000186522	0.329697	5.82018	0.431927
AC011753.4	ENSG00000237916	2.77116	-1.48148	0.0922987
SOWAHC	ENSG00000198142	-0.15293	3.49743	0.738231
LINC00116	ENSG00000175701	-0.240852	1.98902	0.643047
LIMS4	ENSG00000256671	-0.361477	2.51315	0.442923
BCL2L11	ENSG00000153094	0.773555	2.58284	0.100661
AC108463.2	ENSG00000230499	-0.410147	-0.375773	0.596165
MIR4435-2HG	ENSG00000172965	-0.0456807	5.09306	0.918482
AC108463.1	ENSG00000227992	-0.770702	1.25684	0.167655
AC108463.3	ENSG00000271590	-0.947535	1.02421	0.112653
ANAPC1	ENSG00000153107	0.241607	4.84702	0.573373
TMEM87B	ENSG00000153214	-0.54223	6.41981	0.19208
FBLN7	ENSG00000144152	1.50812	3.25492	0.000925431
ZC3H6	ENSG00000188177	1.14628	3.38901	0.0104805
TTL	ENSG00000114999	-0.153037	5.56559	0.717446
POLR1B	ENSG00000125630	-0.283028	3.79788	0.515891
Y_RNA	ENSG00000207383	0.666302	-1.90214	1
CHCHD5	ENSG00000125611	-0.0152201	3.31427	0.984149
AC079922.2	ENSG00000237753	0.352733	1.40691	0.51048
SLC20A1	ENSG00000144136	-0.477339	6.60545	0.250016
IL1A	ENSG00000115008	0.860693	2.96884	0.0610077
IL1B	ENSG00000125538	0.989973	6.15423	0.0181767
PAX8-AS1	ENSG00000189223	0.512799	4.68274	0.226339
CBWD2	ENSG00000136682	-0.43582	4.006	0.318884
WASH2P	ENSG00000146556	-0.194415	3.88585	0.663154
DDX11L2	ENSG00000236397	-0.558755	0.347601	0.472815
RPL23AP7	ENSG00000240356	0.133109	3.30391	0.780207
RABL2A	ENSG00000144134	0.3046	3.73619	0.489411
AC017074.1	ENSG00000227359	-1.85342	-0.498626	0.0452022
SLC35F5	ENSG00000115084	0.128773	5.70711	0.760593
ACTR3	ENSG00000115091	-0.24978	8.14707	0.544282
DDX18	ENSG00000088205	-0.205929	5.7625	0.622685
CCDC93	ENSG00000125633	0.421051	5.85508	0.312805
INSIG2	ENSG00000125629	-0.151081	3.66188	0.740466
STEAP3	ENSG00000115107	0.110879	4.20239	0.80048
C2orf76	ENSG00000186132	-0.401277	1.71529	0.44599
DBI	ENSG00000155368	-0.27115	5.72699	0.518737
TMEM177	ENSG00000144120	-0.157154	2.27279	0.757414
EPB41L5	ENSG00000115109	0.197921	3.24741	0.663663
TMEM185B	ENSG00000226479	-0.278094	4.23875	0.518707
RALB	ENSG00000144118	-0.014947	5.52614	0.974987
GLI2	ENSG00000074047	-0.0255194	5.92743	0.953705
CLASP1	ENSG00000074054	0.216599	6.33965	0.602658
RNU4ATAC	ENSG00000264229	5.41511	-1.89741	0.0751017
NIFK	ENSG00000155438	-0.548185	3.99068	0.21085
TSN	ENSG00000211460	-0.486529	5.56821	0.245615
GYPC	ENSG00000136732	-0.743802	5.6589	0.076111
BIN1	ENSG00000136717	0.223571	5.90316	0.592791
ERCC3	ENSG00000163161	-0.351449	5.43347	0.402119
MAP3K2	ENSG00000169967	-0.114664	5.55547	0.788801
IWS1	ENSG00000163166	-0.092672	5.64153	0.826417
LIMS2	ENSG00000072163	-0.0684469	6.17606	0.87106
WDR33	ENSG00000136709	-0.00755411	5.12605	0.990611
POLR2D	ENSG00000144231	0.0259012	4.03291	0.960721
AMMECR1L	ENSG00000144233	0.149736	5.33457	0.724596
AC012306.2	ENSG00000272667	-0.298523	1.38205	0.642237
SAP130	ENSG00000136715	-0.368076	4.75402	0.390166
UGGT1	ENSG00000136731	0.0820861	7.21471	0.843233
HS6ST1	ENSG00000136720	-0.0939069	5.95189	0.823625
CCDC74B	ENSG00000152076	0.285159	2.50857	0.57117
SMPD4	ENSG00000136699	-0.0690262	6.35457	0.869542
MZT2B	ENSG00000152082	0.242299	4.61762	0.577072
NOC2LP1	ENSG00000213225	-1.44106	1.35227	0.00948574
CCDC115	ENSG00000136710	-0.027736	4.07575	0.961791
IMP4	ENSG00000136718	-0.434861	5.0919	0.303113
PTPN18	ENSG00000072135	-0.299327	4.56833	0.485248
FAM168B	ENSG00000152102	-0.00768835	7.2384	0.986223
PLEKHB2	ENSG00000115762	-0.208165	6.16858	0.617585
MZT2A	ENSG00000173272	0.309254	5.02654	0.464062
AC073869.1	ENSG00000152117	0.337267	4.42673	0.431428
CCDC74A	ENSG00000163040	0.345435	3.12727	0.458416
LYPD1	ENSG00000150551	-0.176429	3.2941	0.702391
NCKAP5	ENSG00000176771	0.0549119	3.3241	0.9059
MGAT5	ENSG00000152127	0.35925	5.89788	0.389443
CCNT2	ENSG00000082258	-0.153483	5.17504	0.719867
RAB3GAP1	ENSG00000115839	0.205887	6.47022	0.620359
R3HDM1	ENSG00000048991	0.234854	4.85583	0.580936
UBXN4	ENSG00000144224	-0.240761	6.94205	0.560906
MCM6	ENSG00000076003	-0.296709	4.26971	0.486896
DARS	ENSG00000115866	-0.0085434	5.61897	0.986585
HNMT	ENSG00000150540	-0.54697	3.47147	0.220187
SPOPL	ENSG00000144228	0.0508483	4.22209	0.913469
GTDC1	ENSG00000121964	0.0228933	3.80652	0.977154
ZEB2	ENSG00000169554	-0.300414	5.58603	0.471692
ACVR2A	ENSG00000121989	-0.105264	4.74947	0.807774
ORC4	ENSG00000115947	-0.374756	3.84154	0.39118
EPC2	ENSG00000135999	-0.444908	4.14232	0.305624
LYPD6	ENSG00000187123	-0.777057	3.88992	0.0752431
MMADHC	ENSG00000168288	-0.159856	6.37922	0.701175
RND3	ENSG00000115963	-0.407107	7.66522	0.323942
RBM43	ENSG00000184898	0.451584	3.45025	0.31639
NMI	ENSG00000123609	0.0463069	2.91599	0.938567
TNFAIP6	ENSG00000123610	-1.39513	1.71568	0.00760196
RIF1	ENSG00000080345	0.0485903	5.36	0.908154
ARL5A	ENSG00000162980	-0.0393428	4.19958	0.938516
STAM2	ENSG00000115145	-0.0683511	5.0532	0.872245
FMNL2	ENSG00000157827	0.0306491	5.14749	0.944542
PRPF40A	ENSG00000196504	-0.0674998	6.24712	0.872689
ARL6IP6	ENSG00000177917	0.591945	3.58456	0.179602
GALNT13	ENSG00000144278	0.397609	2.89905	0.404185
AC061961.1	ENSG00000235949	0.586073	0.486904	0.371639
KCNJ3	ENSG00000162989	1.3365	2.93674	0.0040089
NR4A2	ENSG00000153234	-1.56196	4.82136	0.00032115
GPD2	ENSG00000115159	0.00598824	3.8275	1
GALNT5	ENSG00000136542	0.827994	6.45278	0.0470006
ACVR1	ENSG00000115170	-0.507008	5.75042	0.224347
PKP4	ENSG00000144283	0.215023	5.88056	0.607193
TANC1	ENSG00000115183	0.341768	6.72483	0.409564
WDSUB1	ENSG00000196151	-0.0414417	2.85063	0.957302
2024-03-07	ENSG00000136536	-0.085686	5.96101	0.839043
PLA2R1	ENSG00000153246	0.686366	4.18709	0.110155
RBMS1	ENSG00000153250	-0.0229315	6.4284	0.957722
TANK	ENSG00000136560	0.000623255	5.41337	1
PSMD14	ENSG00000115233	-0.579442	5.65434	0.166709
AC009299.2	ENSG00000232320	0.158824	3.32594	0.738258
DPP4	ENSG00000197635	0.0434333	8.64998	0.916221
AC008063.1	ENSG00000230918	-0.00567848	1.86895	1
TIMM8AP1	ENSG00000231445	-0.21112	1.92341	0.699438
AC007750.1	ENSG00000236841	-1.09093	2.16796	0.0275048
FAP	ENSG00000078098	-0.387319	8.2282	0.347221
IFIH1	ENSG00000115267	0.300825	2.72595	0.52281
GCA	ENSG00000115271	0.358998	2.34159	0.458572
COBLL1	ENSG00000082438	-0.913558	4.11718	0.0351458
TTC21B	ENSG00000123607	0.011421	3.81851	0.988645
SCN9A	ENSG00000169432	-0.655406	5.22245	0.119621
STK39	ENSG00000198648	0.0699371	5.30617	0.871894
CERS6	ENSG00000172292	0.565544	3.23099	0.213165
BBS5	ENSG00000163093	-0.137288	2.28192	0.788123
FASTKD1	ENSG00000138399	0.248763	3.96453	0.569692
PPIG	ENSG00000138398	0.263254	5.24789	0.532483
SSB	ENSG00000138385	-0.328292	6.32736	0.429708
METTL5	ENSG00000138382	0.0697776	3.91649	0.883543
UBR3	ENSG00000144357	-0.0463012	4.51623	0.922015
GORASP2	ENSG00000115806	-0.0512953	7.10603	0.902199
TLK1	ENSG00000198586	-0.167815	4.98129	0.696657
METTL8	ENSG00000123600	0.123437	3.4562	0.800142
DCAF17	ENSG00000115827	-0.0416734	3.78063	0.94186
CYBRD1	ENSG00000071967	0.260347	8.21653	0.527301
DYNC1I2	ENSG00000077380	-0.161332	6.44003	0.698354
SLC25A12	ENSG00000115840	-0.0700399	4.72447	0.87705
HAT1	ENSG00000128708	-0.162183	4.48188	0.708675
METAP1D	ENSG00000172878	-0.398606	3.11441	0.388183
ITGA6	ENSG00000091409	0.500703	3.47846	0.266712
PDK1	ENSG00000152256	0.678654	3.75252	0.122024
MAP3K20	ENSG00000091436	0.496482	6.80703	0.230959
SP3	ENSG00000172845	0.109245	5.75838	0.79498
OLA1	ENSG00000138430	0.0134022	5.60802	0.979734
CIR1	ENSG00000138433	-0.062326	4.50842	0.893261
SCRN3	ENSG00000144306	0.010366	3.52662	0.98625
GPR155	ENSG00000163328	1.35659	3.25734	0.00278982
WIPF1	ENSG00000115935	0.531245	5.16432	0.207914
H3F3AP4	ENSG00000235655	0.128076	2.79286	0.802907
CHN1	ENSG00000128656	0.166288	5.28839	0.696481
ATF2	ENSG00000115966	0.0181585	5.21227	0.969035
uc_338	ENSG00000277948	0.112797	-1.2657	1
ATP5G3	ENSG00000154518	-0.202237	6.24729	0.627388
LNPK	ENSG00000144320	0.267925	4.54077	0.533901
HOXD11	ENSG00000128713	0.0257082	3.12172	0.964143
HOXD10	ENSG00000128710	0.39746	5.44795	0.342702
HOXD-AS2	ENSG00000237380	0.286129	3.78037	0.521002
HOXD9	ENSG00000128709	0.221379	4.56553	0.605149
HOXD8	ENSG00000175879	0.211125	2.67821	0.674423
MIR10B	ENSG00000207744	1.02335	-2.26475	1
AC016739.1	ENSG00000218175	-0.858729	-1.37592	0.54333
MTX2	ENSG00000128654	-0.0687843	4.39487	0.884814
LINC01116	ENSG00000163364	-0.371726	2.65513	0.44636
HNRNPA3	ENSG00000170144	-0.423787	7.63692	0.304605
NFE2L2	ENSG00000116044	-0.431799	6.9177	0.297059
DNAJC19P5	ENSG00000225808	0.772118	0.0621567	0.258093
AC079305.1	ENSG00000222043	-0.871362	-0.618969	0.312308
MIR6512	ENSG00000278418	1.98193	-1.89978	0.398816
AGPS	ENSG00000018510	-0.0509398	5.29404	0.903926
RBM45	ENSG00000155636	-0.299176	3.20671	0.507791
AC009948.1	ENSG00000223960	-0.0983948	2.70624	0.859609
PRKRA	ENSG00000180228	0.293788	5.29524	0.487775
PJVK	ENSG00000204311	0.371735	1.48611	0.489561
FKBP7	ENSG00000079150	-0.0949644	5.0306	0.826042
PLEKHA3	ENSG00000116095	-0.127939	4.28387	0.770481
SESTD1	ENSG00000187231	0.645608	5.34616	0.124305
CWC22	ENSG00000163510	-0.278181	4.15258	0.523922
UBE2E3	ENSG00000170035	0.0509989	5.58215	0.907374
ITGA4	ENSG00000115232	0.0602383	6.56388	0.88585
CERKL	ENSG00000188452	-0.142866	4.39347	0.742181
SSFA2	ENSG00000138434	-0.136272	7.65322	0.741431
DNAJC10	ENSG00000077232	0.00406062	7.30082	0.993184
NCKAP1	ENSG00000061676	0.151582	7.46578	0.713754
NUP35	ENSG00000163002	-0.476904	2.11898	0.3247
ZNF804A	ENSG00000170396	-0.184518	3.02138	0.700561
ZC3H15	ENSG00000065548	-0.563233	5.58372	0.179598
ITGAV	ENSG00000138448	0.145052	7.95438	0.725039
FAM171B	ENSG00000144369	0.267478	3.8353	0.544687
TFPI	ENSG00000003436	-0.084463	5.08602	0.846564
GULP1	ENSG00000144366	0.554349	4.08394	0.203642
COL3A1	ENSG00000168542	0.568582	14.5294	0.166982
COL5A2	ENSG00000204262	0.523312	11.2716	0.203325
WDR75	ENSG00000115368	-0.0182739	4.88617	0.966847
SLC40A1	ENSG00000138449	-0.0590286	5.18747	0.892341
ASNSD1	ENSG00000138381	-0.225511	5.25197	0.592344
OSGEPL1	ENSG00000128694	0.137053	2.02662	0.786664
ORMDL1	ENSG00000128699	-0.174974	5.27739	0.678652
PMS1	ENSG00000064933	-0.146106	3.68874	0.744887
HIBCH	ENSG00000198130	0.170481	3.65753	0.704336
INPP1	ENSG00000151689	0.539629	4.63888	0.206282
MFSD6	ENSG00000151690	0.58569	3.58085	0.184145
NEMP2	ENSG00000189362	0.945691	3.13729	0.0384114
NAB1	ENSG00000138386	0.809627	5.72174	0.0539904
GLS	ENSG00000115419	0.240015	9.98673	0.559024
STAT1	ENSG00000115415	-0.394187	7.54902	0.339694
MYO1B	ENSG00000128641	-0.823667	7.20818	0.0473048
NABP1	ENSG00000173559	0.890939	7.37763	0.0319643
SLC39A10	ENSG00000196950	0.680432	4.66552	0.112128
RNU6-915P	ENSG00000201813	-4.03421	-2.49093	0.509804
STK17B	ENSG00000081320	0.375159	4.81019	0.375611
GTF3C3	ENSG00000119041	0.0726147	4.90948	0.869973
PGAP1	ENSG00000197121	0.30067	3.81466	0.492624
ANKRD44	ENSG00000065413	-0.571035	3.82012	0.193275
SF3B1	ENSG00000115524	0.0871212	8.73027	0.832448
COQ10B	ENSG00000115520	-0.559475	4.87597	0.18824
HSPD1	ENSG00000144381	-0.376965	7.3685	0.361507
HSPE1	ENSG00000115541	-0.286297	3.54345	0.526895
MOB4	ENSG00000115540	-0.445517	3.19958	0.322939
RFTN2	ENSG00000162944	-0.126852	3.21892	0.79983
MARS2	ENSG00000247626	-0.236026	2.39037	0.63939
SATB2	ENSG00000119042	0.00157982	3.84839	1
C2orf69	ENSG00000178074	0.0281294	3.16063	0.965039
MAIP1	ENSG00000162972	-0.434803	3.07389	0.340413
SPATS2L	ENSG00000196141	0.187809	6.85245	0.650484
KCTD18	ENSG00000155729	0.110291	4.03447	0.805439
BZW1	ENSG00000082153	-0.248435	7.3864	0.547524
CLK1	ENSG00000013441	0.166806	5.14284	0.692255
Y_RNA	ENSG00000252759	-0.204408	-0.120847	1
PPIL3	ENSG00000240344	0.125615	4.10378	0.778107
NIF3L1	ENSG00000196290	-0.485949	3.40581	0.276405
ORC2	ENSG00000115942	-0.0732424	3.6291	0.884591
FAM126B	ENSG00000155744	0.321445	3.79967	0.471058
NDUFB3	ENSG00000119013	-0.0778218	3.79238	0.873553
CFLAR	ENSG00000003402	0.740444	6.47374	0.0752995
CASP8	ENSG00000064012	-0.420743	3.73271	0.341715
TRAK2	ENSG00000115993	-0.157589	5.53171	0.707778
STRADB	ENSG00000082146	0.238409	4.81372	0.574577
TMEM237	ENSG00000155755	-0.321225	4.71647	0.449298
ALS2	ENSG00000003393	0.20538	5.55532	0.625663
FZD7	ENSG00000155760	0.736787	6.71152	0.0763102
SUMO1	ENSG00000116030	-0.0784493	5.81297	0.853161
NOP58	ENSG00000055044	-0.597405	5.1404	0.157869
SNORD11	ENSG00000238317	-2.07985	-1.75589	0.245788
BMPR2	ENSG00000204217	0.00496516	6.57632	0.99214
FAM117B	ENSG00000138439	0.323265	3.07166	0.484937
WDR12	ENSG00000138442	-0.811507	4.13104	0.0600823
NBEAL1	ENSG00000144426	0.538154	4.03182	0.214672
CYP20A1	ENSG00000119004	-0.607175	2.77451	0.192979
ABI2	ENSG00000138443	0.3094	5.87801	0.458773
RAPH1	ENSG00000173166	0.686468	3.41838	0.119962
PARD3B	ENSG00000116117	-0.128924	4.47291	0.769186
NRP2	ENSG00000118257	0.564923	10.4592	0.169967
AC007362.1	ENSG00000225216	0.115454	2.43617	0.806826
EEF1B2	ENSG00000114942	0.0862519	1.61422	0.907785
ADAM23	ENSG00000114948	-0.206044	6.27562	0.620788
AC010731.2	ENSG00000228577	-0.638621	0.20636	0.437875
FASTKD2	ENSG00000118246	-0.155097	4.34987	0.727287
KLF7	ENSG00000118263	0.294958	6.25706	0.478311
MIR2355	ENSG00000253008	1.3809	-1.61033	0.483528
KLF7-IT1	ENSG00000237892	-1.04984	1.02315	0.0785654
AC007879.4	ENSG00000240440	6.08044	-1.47925	0.0127308
CREB1	ENSG00000118260	-0.00956008	4.41619	0.992399
CCNYL1	ENSG00000163249	0.343759	4.35924	0.42746
PLEKHM3	ENSG00000178385	0.295639	3.80537	0.499095
IDH1	ENSG00000138413	-0.000628565	7.06989	1
PIKFYVE	ENSG00000115020	0.0493061	5.62271	0.909902
RPE	ENSG00000197713	0.112795	4.94689	0.795428
KANSL1L	ENSG00000144445	-0.387202	3.32912	0.396525
LANCL1	ENSG00000115365	0.481284	5.37044	0.250944
ATIC	ENSG00000138363	-0.301954	6.08804	0.468709
FN1	ENSG00000115414	0.545903	15.5392	0.184443
LINC01614	ENSG00000230838	-0.528891	-0.617106	0.546614
MREG	ENSG00000118242	0.771784	1.84447	0.12643
PECR	ENSG00000115425	-0.00989706	2.07612	1
XRCC5	ENSG00000079246	-0.0738124	7.50814	0.858651
LINC01963	ENSG00000260804	-1.51825	2.49666	0.00167701
2024-03-04	ENSG00000144583	-0.594598	4.03204	0.171571
SMARCAL1	ENSG00000138375	0.0358763	4.43499	0.939982
RPL37A	ENSG00000197756	0.0239466	7.74996	0.954363
IGFBP5	ENSG00000115461	1.1835	10.9466	0.0044285
TNS1	ENSG00000079308	0.889585	9.17665	0.0316084
MIR6809	ENSG00000275458	-0.811751	-2.26721	1
ARPC2	ENSG00000163466	0.0585385	8.60486	0.887134
AC021016.2	ENSG00000261338	-1.13549	0.93645	0.0638363
AAMP	ENSG00000127837	-0.345029	6.20691	0.407049
PNKD	ENSG00000127838	-0.301405	6.21524	0.468956
TMBIM1	ENSG00000135926	-0.115584	7.17364	0.780315
CTDSP1	ENSG00000144579	0.0675365	5.96745	0.873305
CNOT9	ENSG00000144580	-0.249685	5.43047	0.552624
PLCD4	ENSG00000115556	0.692996	2.47673	0.148068
ZNF142	ENSG00000115568	0.0227592	4.4168	0.96201
BCS1L	ENSG00000074582	-0.331252	3.97301	0.447786
RNF25	ENSG00000163481	-0.612071	4.33308	0.157302
STK36	ENSG00000163482	0.246561	5.50591	0.55718
TTLL4	ENSG00000135912	-0.465658	4.34413	0.27726
CYP27A1	ENSG00000135929	0.244487	3.43073	0.58117
AC097468.3	ENSG00000272644	-2.27671	-0.994607	0.041032
CNPPD1	ENSG00000115649	-0.398847	4.76759	0.35002
RETREG2	ENSG00000144567	-0.221031	6.05854	0.596372
ZFAND2B	ENSG00000158552	-0.133671	3.79444	0.772697
ATG9A	ENSG00000198925	0.0792352	6.14725	0.850647
ANKZF1	ENSG00000163516	-0.0119045	4.71908	0.981427
GLB1L	ENSG00000163521	-0.0648929	2.94778	0.899974
STK16	ENSG00000115661	0.411092	4.51924	0.334833
TUBA4A	ENSG00000127824	0.263761	2.41456	0.596198
DNAJB2	ENSG00000135924	0.251973	5.69631	0.546444
MIR153-1	ENSG00000207647	4.14303	-2.4859	0.509804
DNPEP	ENSG00000123992	-0.260308	5.48085	0.535311
DES	ENSG00000175084	1.72689	6.31707	5.10639e-05
AC053503.4	ENSG00000234638	5.10161	-2.06847	0.139845
SPEG	ENSG00000072195	0.84627	8.52046	0.0409114
GMPPA	ENSG00000144591	-0.0336792	5.832	0.938295
CHPF	ENSG00000123989	-0.0197298	8.85335	0.962053
TMEM198	ENSG00000188760	-0.153347	2.38351	0.772098
OBSL1	ENSG00000124006	0.463455	6.95906	0.26299
INHA	ENSG00000123999	0.687698	1.73061	0.17402
STK11IP	ENSG00000144589	-0.181313	4.67462	0.677203
SLC4A3	ENSG00000114923	0.655222	5.31519	0.12008
EPHA4	ENSG00000116106	0.577463	5.71001	0.16777
FARSB	ENSG00000116120	-0.496666	4.5484	0.246957
ACSL3	ENSG00000123983	-0.0343857	6.70227	0.935249
KCNE4	ENSG00000152049	-1.10896	7.93542	0.00774672
SCG2	ENSG00000171951	-1.38327	2.59909	0.00369844
WDFY1	ENSG00000085449	0.0191618	6.40212	0.965
MRPL44	ENSG00000135900	0.057043	4.36639	0.89814
SERPINE2	ENSG00000135919	-0.971337	10.3217	0.0190133
CUL3	ENSG00000036257	-0.0806161	5.76257	0.848984
DOCK10	ENSG00000135905	0.28464	5.18113	0.502787
IRS1	ENSG00000169047	0.478755	6.14533	0.250231
AC010735.2	ENSG00000272622	-0.59641	0.278704	0.455892
RHBDD1	ENSG00000144468	-0.16617	4.26992	0.705002
MFF	ENSG00000168958	0.0474385	5.91897	0.911715
AGFG1	ENSG00000173744	-0.0192247	6.20691	0.965234
DAW1	ENSG00000123977	0.712167	1.4595	0.202015
PID1	ENSG00000153823	-0.676556	3.76931	0.122345
TRIP12	ENSG00000153827	0.0742179	7.63708	0.85774
FBXO36	ENSG00000153832	1.48689	1.8415	0.00459921
SP110	ENSG00000135899	-0.0042199	2.99791	1
SP140L	ENSG00000185404	-0.579445	3.7772	0.18442
SP100	ENSG00000067066	0.0067726	5.72512	0.990648
CAB39	ENSG00000135932	0.688537	5.91568	0.0994089
ITM2C	ENSG00000135916	0.3336	8.50515	0.41775
PSMD1	ENSG00000173692	-0.294362	6.6984	0.477687
ARMC9	ENSG00000135931	-1.22778	6.07136	0.00359584
AC018738.1	ENSG00000237039	-1.43346	-1.07917	0.191851
NCL	ENSG00000115053	-0.572363	8.46844	0.165257
SNORA75	ENSG00000206885	-0.864998	-1.07711	0.439101
SNORD20	ENSG00000207280	0.818744	-0.0226212	0.312304
PTMA	ENSG00000187514	-0.378552	8.22495	0.358224
PDE6D	ENSG00000156973	-0.102071	3.52831	0.822678
COPS7B	ENSG00000144524	0.00539164	5.03515	0.995009
DIS3L2	ENSG00000144535	-0.410606	4.14053	0.344832
[truncated: 9,891 more rows]

## Sheet: UP
WNT2B	ENSG00000134245	3.43995	5.20974	1.81052e-13			geneName	geneID	logFC	logCPM	PValue
TINAGL1	ENSG00000142910	2.64294	6.4567	2.10074e-09
ANO3	ENSG00000134343	2.95322	3.14589	2.54687e-09
ZNF467	ENSG00000181444	3.1168	1.7803	6.78385e-08
PPP1R12B	ENSG00000077157	2.29792	6.95959	1.16073e-07
RASD2	ENSG00000100302	3.00252	1.79243	1.47336e-07
H19	ENSG00000130600	2.72696	2.22707	3.17279e-07
PPP1R14A	ENSG00000167641	2.73993	2.16952	3.27976e-07
CLIC3	ENSG00000169583	2.11686	6.14298	1.04176e-06
PPFIA4	ENSG00000143847	2.16563	3.56737	3.03674e-06
FER1L4	ENSG00000088340	2.01615	4.88218	4.56852e-06
U2	ENSG00000278048	2.38663	2.24303	4.64352e-06
SNAP25	ENSG00000132639	2.44366	2.0552	4.74664e-06
PTGIS	ENSG00000124212	1.95276	5.49724	6.71869e-06
PRELP	ENSG00000188783	2.18235	2.68551	8.03022e-06
CFHR1	ENSG00000244414	2.00281	3.35857	1.64849e-05
SMIM10L2B	ENSG00000196972	2.20384	2.29606	1.77955e-05
AL356414.1	ENSG00000205300	2.85045	0.997306	1.78285e-05
WDR86	ENSG00000187260	2.06747	2.62862	2.39971e-05
MAOA	ENSG00000189221	2.05976	2.65665	2.4942e-05
PHYHIP	ENSG00000168490	2.32313	1.59747	3.21569e-05
NXPH3	ENSG00000182575	2.12329	2.13462	4.56261e-05
IL33	ENSG00000137033	2.0866	2.20259	4.91199e-05
AC254633.1	ENSG00000272482	1.81332	4.07568	4.92879e-05
ADAMTS15	ENSG00000166106	1.86822	3.47598	5.00208e-05
DES	ENSG00000175084	1.72689	6.31707	5.10639e-05
HAPLN3	ENSG00000140511	1.69712	6.72437	6.58059e-05
CEMIP	ENSG00000103888	1.67319	10.0454	7.15438e-05
GIPR	ENSG00000010310	1.88828	2.82524	8.27909e-05
BDKRB2	ENSG00000168398	1.66259	6.01292	9.73546e-05
PALM	ENSG00000099864	1.90847	2.39655	0.000112267
LINC02298	ENSG00000257556	2.343	1.01608	0.000119861
TIMP3	ENSG00000100234	1.60998	11.6861	0.000128097
ALS2CL	ENSG00000178038	1.70336	3.94659	0.000137622
GBP2	ENSG00000162645	1.61288	5.93494	0.000154963
OLFML2B	ENSG00000162745	1.70855	3.67579	0.00015539
PPP1R3G	ENSG00000219607	1.80518	2.49196	0.000227688
SPAG4	ENSG00000061656	1.69892	3.25748	0.000239187
AC002553.1	ENSG00000227782	4.1963	-0.471511	0.000248027
RGS5	ENSG00000143248	1.70572	3.06707	0.000249945
SORBS1	ENSG00000095637	1.56402	5.60209	0.000252905
VSIR	ENSG00000107738	1.53378	6.71112	0.000283523
EPHB2	ENSG00000133216	1.55208	5.61979	0.000283653
THSD7A	ENSG00000005108	1.67405	3.23874	0.000292973
RARB	ENSG00000077092	1.54108	5.77055	0.00030459
ALDOC	ENSG00000109107	1.54247	5.5383	0.000305424
AC027559.1	ENSG00000259658	2.1975	0.902408	0.000336783
WSB1	ENSG00000109046	1.5051	8.32803	0.000339576
THCAT158	ENSG00000263293	2.93341	0.155743	0.000342416
PLK5	ENSG00000185988	1.75238	2.4519	0.000345502
CRABP2	ENSG00000143320	1.5	6.90062	0.000375791
S1PR5	ENSG00000180739	1.83795	1.96228	0.000417987
ADAMTSL1	ENSG00000178031	1.46729	8.66286	0.000468041
AC124312.2	ENSG00000257647	2.10367	0.947838	0.000506343
PDE7B	ENSG00000171408	1.48631	5.02993	0.000554011
MAMSTR	ENSG00000176909	1.81941	1.79559	0.00063782
AKAP12	ENSG00000131016	1.43606	6.7958	0.000652133
IFFO2	ENSG00000169991	1.46708	4.94711	0.000664916
OXTR	ENSG00000180914	1.43187	6.84933	0.00067319
IGF2	ENSG00000167244	1.54271	3.40725	0.000676564
COL9A2	ENSG00000049089	1.83413	1.63598	0.000702602
CARMN	ENSG00000249669	1.42772	6.56251	0.000720982
AC012313.10	ENSG00000279611	3.35532	-0.356482	0.000739506
F11R	ENSG00000158769	1.60979	2.71935	0.000784439
MIR145	ENSG00000276365	1.93986	1.21497	0.000784949
MTSS1	ENSG00000170873	1.5522	2.97347	0.000877442
HSPB7	ENSG00000173641	1.44204	4.61566	0.000892502
FBLN7	ENSG00000144152	1.50812	3.25492	0.000925431
NIPAL4	ENSG00000172548	1.4721	3.60592	0.000976252
AC004846.1	ENSG00000258376	1.56254	2.57951	0.00115977
NEURL1B	ENSG00000214357	1.50923	2.85713	0.0012273
ADAMTSL4	ENSG00000143382	1.42644	3.90236	0.00124527
AC114488.1	ENSG00000229167	6.65828	-1.06057	0.00143701
AC114956.2	ENSG00000248554	6.65828	-1.06057	0.00143701
POM121L9P	ENSG00000128262	1.47253	3.08984	0.00145721
DCHS1	ENSG00000166341	1.38436	4.29964	0.00145862
SERHL	ENSG00000172250	1.71505	1.60636	0.00149042
COLEC12	ENSG00000158270	1.4005	4.00066	0.00150451
RASSF5	ENSG00000266094	1.40073	3.93372	0.00152541
TEF	ENSG00000167074	1.39552	4.02491	0.00157058
IMPA2	ENSG00000141401	1.42621	3.212	0.0016965
PPP1R32	ENSG00000162148	1.73942	1.43942	0.00179265
GCNT1	ENSG00000187210	1.33834	4.81329	0.00188162
KIAA1683	ENSG00000130518	1.43599	3.02646	0.0019042
ALDH1B1	ENSG00000137124	1.29369	7.26172	0.00201532
CXorf38	ENSG00000185753	1.37291	3.69144	0.00208123
CPZ	ENSG00000109625	1.49631	2.35802	0.00214422
HSPA2	ENSG00000126803	1.2759	7.69099	0.00228154
MYOCD	ENSG00000141052	1.27811	6.80223	0.00231966
C7orf69	ENSG00000136275	1.4729	2.54135	0.00232877
NOTCH3	ENSG00000074181	1.27512	6.8547	0.00236747
AC087239.1	ENSG00000278743	6.53405	-1.15454	0.00243493
FAXDC2	ENSG00000170271	1.32395	4.09697	0.0024864
PPM1J	ENSG00000155367	1.61977	1.64778	0.00249964
BCHE	ENSG00000114200	1.31532	4.23518	0.00253114
TNFRSF1B	ENSG00000028137	1.40252	2.88549	0.0025819
CAMK2A	ENSG00000070808	1.29887	4.59191	0.00261763
SENCR	ENSG00000254703	1.79062	0.922505	0.00264123
ABCA7	ENSG00000064687	1.31182	4.09678	0.00271855
ACSS2	ENSG00000131069	1.26676	5.73627	0.00275883
HSPG2	ENSG00000142798	1.24575	11.0968	0.00277625
GPR155	ENSG00000163328	1.35659	3.25734	0.00278982
GRK3	ENSG00000100077	1.34342	3.248	0.00305737
SFRP1	ENSG00000104332	1.29313	4.11672	0.0031327
EMP2	ENSG00000213853	1.28869	4.05508	0.00326749
MEGF6	ENSG00000162591	1.22945	7.14909	0.0033061
CYB5A	ENSG00000166347	1.24262	5.58707	0.0033614
GPRASP1	ENSG00000198932	1.29343	3.8768	0.00342608
KRT7	ENSG00000135480	1.44953	2.05556	0.0036005
CKB	ENSG00000166165	1.44953	2.05556	0.0036005
PRRT2	ENSG00000167371	1.36668	2.64124	0.00361189
GCH1	ENSG00000131979	1.34955	3.01988	0.00364673
PKD1L1	ENSG00000158683	1.29312	3.7236	0.0037096
PTGES	ENSG00000148344	1.23061	5.45212	0.00375791
GBP4	ENSG00000162654	1.40162	2.46344	0.00380299
LXN	ENSG00000079257	1.22741	5.3318	0.00385548
MRVI1	ENSG00000072952	1.20842	6.88376	0.00390737
ITGB3	ENSG00000259207	1.23048	5.08865	0.00396176
AC010531.3	ENSG00000261592	1.80494	0.725541	0.00398079
CDR2	ENSG00000140743	1.28593	3.65251	0.00399344
KCNJ3	ENSG00000162989	1.3365	2.93674	0.0040089
MIR23B	ENSG00000207563	2.01755	0.49886	0.00406065
AC005180.2	ENSG00000267505	2.01755	0.49886	0.00406065
C16orf86	ENSG00000159761	1.50414	1.85382	0.00412624
STX11	ENSG00000135604	1.58662	1.4539	0.00412782
SNORD116-18	ENSG00000206688	6.3981	-1.25497	0.00417417
MGP	ENSG00000111341	1.22383	4.71693	0.00440486
IGFBP5	ENSG00000115461	1.1835	10.9466	0.0044285
IGFBP4	ENSG00000141753	1.18357	10.0556	0.00444033
LAMA5	ENSG00000130702	1.18607	7.90181	0.00446335
FBXO36	ENSG00000153832	1.48689	1.8415	0.00459921
AC009093.2	ENSG00000260517	1.56395	1.43765	0.00473977
CORO6	ENSG00000167549	1.23562	4.05162	0.00476317
LINC00672	ENSG00000263874	1.24765	3.76516	0.00476605
B4GALT5	ENSG00000158470	1.16934	8.64275	0.00498242
KIAA1755	ENSG00000149633	1.29931	2.87219	0.00514306
ASPM	ENSG00000066279	1.21603	4.30363	0.00517189
ADGRB2	ENSG00000121753	1.18458	5.42322	0.00524493
KIAA0513	ENSG00000135709	1.18034	5.72252	0.00525206
HLTF	ENSG00000071794	1.18754	5.15666	0.00533653
SYNPO2	ENSG00000172403	1.15613	9.16999	0.00545316
PC	ENSG00000173599	1.17207	5.83186	0.00548371
PCAT6	ENSG00000228288	1.47391	1.64618	0.00570156
MIR31HG	ENSG00000171889	1.33986	2.36449	0.00576053
TGM2	ENSG00000198959	1.14415	10.8344	0.0058951
SNAI3	ENSG00000185669	2.00501	0.335421	0.00591186
AC103739.1	ENSG00000259212	2.40003	-0.251693	0.00607288
CSDC2	ENSG00000172346	1.38542	1.93451	0.00616685
ZNF404	ENSG00000176222	1.31748	2.50898	0.00635144
CDCP1	ENSG00000163814	1.18777	4.03502	0.00659891
PDLIM3	ENSG00000154553	1.14524	5.72357	0.00663075
NALT1	ENSG00000237886	1.52484	1.28453	0.00671652
CORO2A	ENSG00000106789	1.26588	2.63985	0.00688263
AL513534.1	ENSG00000260400	1.50865	1.33708	0.00695566
AP000442.1	ENSG00000255008	2.56706	-0.475133	0.00696616
OSR1	ENSG00000143867	1.15103	4.87987	0.00698947
TGFBR3	ENSG00000069702	1.18622	3.80213	0.0070775
RPL18AP7	ENSG00000232439	6.248	-1.36281	0.00724341
TRPC1	ENSG00000144935	1.15282	4.50776	0.00751303
C1orf21	ENSG00000116667	1.14476	4.61448	0.0076475
KCND1	ENSG00000102057	1.28644	2.46189	0.00775992
ABLIM1	ENSG00000099204	1.18628	3.4782	0.00790599
CNTNAP2	ENSG00000174469	1.15236	4.14431	0.00799172
DIXDC1	ENSG00000150764	1.12378	4.95287	0.00830679
S100A4	ENSG00000196154	1.12084	5.16284	0.00831757
SYTL4	ENSG00000102362	1.17758	3.66462	0.00832043
EIF4A2	ENSG00000156976	1.09747	8.38441	0.00832678
MICAL3	ENSG00000243156	1.11111	5.90526	0.00833406
AL590399.4	ENSG00000231995	3.5386	-0.974316	0.00839028
PER3	ENSG00000049246	1.1408	4.35861	0.00841975
EEF1A2	ENSG00000101210	1.1751	3.45837	0.00847595
NYAP1	ENSG00000166924	1.24035	2.55313	0.00868061
LNX1	ENSG00000072201	1.21619	2.97983	0.00868202
CPXM1	ENSG00000088882	1.11356	5.17961	0.00880523
SALL2	ENSG00000165821	1.1436	4.01291	0.00905398
BRICD5	ENSG00000182685	1.36463	1.84005	0.00912829
LMOD1	ENSG00000163431	1.0822	7.84397	0.00932971
CYS1	ENSG00000205795	1.44488	1.35357	0.00948574
APOBEC3G	ENSG00000239713	1.27616	2.20271	0.0095518
TNFAIP2	ENSG00000185215	1.08083	7.13328	0.0095798
AC092903.2	ENSG00000248787	2.48023	-0.537277	0.0100337
RASL11A	ENSG00000122035	1.29548	1.91042	0.0103808
RARRES1	ENSG00000118849	1.10846	4.29081	0.0104373
ADORA1	ENSG00000163485	1.10886	4.37495	0.0104697
TMEM178A	ENSG00000152154	1.25915	2.22128	0.010475
ZC3H6	ENSG00000188177	1.14628	3.38901	0.0104805
SPINT2	ENSG00000167642	1.25986	2.06363	0.0109231
C17orf107	ENSG00000205710	1.32862	1.81507	0.011243
BTN3A2	ENSG00000186470	1.1014	4.25242	0.0112985
LINC01474	ENSG00000236849	1.60765	0.585686	0.0114634
ZKSCAN3	ENSG00000189298	1.24017	2.26696	0.0115275
TSPAN15	ENSG00000099282	1.18966	2.63177	0.0116714
USP49	ENSG00000164663	1.12743	3.3762	0.0117783
AP001052.1	ENSG00000281420	2.84443	-0.739357	0.0118324
OPHN1	ENSG00000079482	1.09534	4.05198	0.0122065
SMIM1	ENSG00000235169	1.32156	1.72566	0.0122623
WISP1	ENSG00000104415	1.2245	2.28472	0.0125417
AC007879.4	ENSG00000240440	6.08044	-1.47925	0.0127308
ROBO1	ENSG00000169855	1.03694	7.4038	0.012772
BST2	ENSG00000130303	1.12951	3.14509	0.0128478
TMEM106B	ENSG00000106460	1.04254	6.26996	0.0128618
SHROOM3	ENSG00000138771	1.05503	4.91472	0.0131354
CGNL1	ENSG00000128849	1.09227	3.84969	0.0131743
AL122125.1	ENSG00000277050	3.41437	-1.06265	0.0134121
SNORD114-20	ENSG00000202048	3.41437	-1.06265	0.0134121
LOXL4	ENSG00000138131	1.03467	6.36407	0.0134334
KAZALD1	ENSG00000107821	1.1147	3.32919	0.0137263
ZNF510	ENSG00000081386	1.13993	2.96205	0.0138234
SEMA4G	ENSG00000095539	1.09797	3.54544	0.0140071
PLEKHG5	ENSG00000171680	1.03673	5.36275	0.0142163
NFE2L3	ENSG00000050344	1.0375	5.40542	0.0142594
GDPD5	ENSG00000158555	1.04437	4.8254	0.0143942
PIP5KL1	ENSG00000167103	1.20637	2.12408	0.0144548
JPH2	ENSG00000149596	1.02356	5.98279	0.0147346
EBF4	ENSG00000088881	1.07411	3.84638	0.0147509
RNU6ATAC18P	ENSG00000221340	1.34155	1.45127	0.0147643
ICAM5	ENSG00000105376	1.04181	4.62865	0.0151837
ZMYM3	ENSG00000147130	1.01521	5.91875	0.0156288
TTBK2	ENSG00000128881	1.03254	4.69205	0.0156984
GALNT6	ENSG00000139629	1.05364	3.8936	0.0160365
PAPLN	ENSG00000100767	1.06502	3.71008	0.0160545
PAQR8	ENSG00000170915	1.06127	3.6068	0.016063
TMTC2	ENSG00000179104	1.07592	3.3415	0.0160783
LAYN	ENSG00000204381	1.01254	5.78567	0.0162125
PDLIM1	ENSG00000107438	1.00924	5.80361	0.0163268
ABI3BP	ENSG00000154175	1.00196	6.68885	0.0163876
GSDMB	ENSG00000073605	1.02569	4.85241	0.016388
ADRA1B	ENSG00000170214	1.35145	1.22805	0.0164527
HIP1	ENSG00000127946	1.00919	5.38947	0.017006
AK4	ENSG00000162433	1.05173	3.6314	0.0171208
IFNE	ENSG00000184995	1.17012	2.24782	0.0171226
2024-03-02	ENSG00000117791	1.19652	2.02055	0.0171262
ATG16L2	ENSG00000168010	1.01593	4.66634	0.0175526
HTRA3	ENSG00000170801	1.19069	1.80095	0.0189017
METTL27	ENSG00000165171	1.24539	1.62955	0.0189922
NHSL2	ENSG00000204131	1.01868	4.12727	0.019209
MX1	ENSG00000157601	1.03535	3.7096	0.0192304
MCTP2	ENSG00000140563	1.02194	3.87246	0.0193699
ADAMTS14	ENSG00000138316	1.12625	2.42771	0.0195906
LSM11	ENSG00000155858	1.02085	3.922	0.0197496
ADIRF-AS1	ENSG00000272734	1.11394	2.46737	0.02084
UCP2	ENSG00000175567	1.12682	2.3531	0.0212033
AC245014.3	ENSG00000276216	3.27842	-1.15665	0.0215665
SPTBN2	ENSG00000173898	1.04065	3.14371	0.0217496
RASA4DP	ENSG00000233297	1.33174	0.941184	0.0221021
RNVU1-15	ENSG00000207205	5.89084	-1.60579	0.0226768
AL360181.1	ENSG00000226699	2.08025	-0.476944	0.0230709
AC124784.1	ENSG00000257910	2.08025	-0.476944	0.0230709
CHST1	ENSG00000175264	1.15228	1.7753	0.0231639
KCND2	ENSG00000184408	1.1136	2.20995	0.0233639
PTPRQ	ENSG00000139304	1.00715	3.51769	0.0240236
PLPPR3	ENSG00000129951	1.23515	1.48154	0.0242206
SH3D21	ENSG00000214193	1.00696	3.35745	0.0242226
AC005034.5	ENSG00000271452	1.93617	-0.306571	0.0245106
AL627230.2	ENSG00000274911	1.93617	-0.306571	0.0245106
MAP3K14	ENSG00000006062	1.01712	3.22457	0.0251038
ACBD4	ENSG00000181513	1.01457	3.08309	0.0261861
MIR149	ENSG00000207611	1.68452	0.109595	0.0264977
AC006059.1	ENSG00000230084	1.40622	0.554739	0.02678
RPS3AP38	ENSG00000226318	1.45276	0.365713	0.0268201
AC090498.1	ENSG00000279483	2.62408	-0.893016	0.0270427
AC245595.1	ENSG00000232527	1.21842	1.36803	0.0278877
RARRES2	ENSG00000106538	1.21842	1.36803	0.0278877
PAQR5	ENSG00000137819	1.02538	2.5648	0.0295291
BATF3	ENSG00000123685	1.02252	2.52004	0.0299976
TMEM91	ENSG00000142046	1.01787	2.45019	0.0307617
SUSD2	ENSG00000099994	1.01694	2.60091	0.0308704
C5orf46	ENSG00000178776	1.3305	0.694933	0.0319423
AC244154.1	ENSG00000274487	1.3305	0.694933	0.0319423
KIAA1024	ENSG00000169330	1.00893	2.63614	0.0321984
ELOVL3	ENSG00000119915	1.34456	0.612207	0.0323643
SECTM1	ENSG00000141574	1.07663	1.87247	0.0328785
GUCA1B	ENSG00000112599	1.40052	0.331191	0.0335331
AL162231.2	ENSG00000230074	1.15947	1.52663	0.0336418
SNORD3A	ENSG00000263934	1.75674	-0.203761	0.0339102
RAP1BP1	ENSG00000236857	1.68225	-0.0613324	0.0340884
AL162274.1	ENSG00000273521	1.68225	-0.0613324	0.0340884
RPS2P46	ENSG00000189343	1.68225	-0.0613324	0.0340884
AL450384.1	ENSG00000225527	3.12832	-1.25712	0.0348666
EIF1P6	ENSG00000267938	3.12832	-1.25712	0.0348666
CAMK1G	ENSG00000008118	1.11265	1.66949	0.0352672
WNT5A-AS1	ENSG00000244586	1.11256	1.62794	0.0358234
AC012181.3	ENSG00000261270	1.11256	1.62794	0.0358234
PPIAP53	ENSG00000223878	1.11256	1.62794	0.0358234
LDHD	ENSG00000166816	1.17249	1.16932	0.0380252
AL591895.1	ENSG00000242861	1.175	1.11023	0.0388178
SNORA55	ENSG00000201457	1.30033	0.583118	0.0392385
AC022400.5	ENSG00000272140	1.30033	0.583118	0.0392385
TGFBR3L	ENSG00000260001	1.01119	2.17047	0.0395674
RN7SL574P	ENSG00000266075	5.6725	-1.74433	0.0409646
AC114482.1	ENSG00000232622	5.6725	-1.74433	0.0409646
RNVU1-6	ENSG00000201558	5.6725	-1.74433	0.0409646
U1	ENSG00000273768	5.6725	-1.74433	0.0409646
RNA5SP18	ENSG00000212237	5.6725	-1.74433	0.0409646
COX6CP10	ENSG00000238008	5.6725	-1.74433	0.0409646
AL390955.2	ENSG00000271040	2.49984	-0.97635	0.041032
RNU1-103P	ENSG00000252311	2.49984	-0.97635	0.041032
AC006017.1	ENSG00000229591	2.18315	-0.741289	0.0439913
AC084337.1	ENSG00000254595	1.23816	0.720679	0.044879
GSTT2	ENSG00000099984	1.11189	1.34988	0.0451174
AC098484.1	ENSG00000228452	1.67924	-0.255099	0.0451175
RTCA-AS1	ENSG00000224616	1.76743	-0.419084	0.045436
LIF-AS1	ENSG00000232530	1.76743	-0.419084	0.045436
HIST1H2BG	ENSG00000273802	1.24591	0.639474	0.0461633

## Sheet: DOWN
geneName	geneID	logFC	logCPM	PValue
U62317.1	ENSG00000226738	-5.33943	0.653069	2.20515e-08
KLHDC7B	ENSG00000130487	-2.69422	2.5148	1.86117e-07
NTM	ENSG00000182667	-2.26863	2.65056	5.99935e-06
GPNMB	ENSG00000136235	-1.92842	5.71417	8.3376e-06
AC007938.2	ENSG00000270823	-2.53053	1.52864	1.66708e-05
TSPAN10	ENSG00000182612	-1.90991	3.79112	2.58301e-05
SGCG	ENSG00000102683	-2.08162	2.32498	3.54645e-05
PSAT1	ENSG00000135069	-1.74741	6.74224	4.07701e-05
LINC01133	ENSG00000224259	-2.07369	2.11886	5.66938e-05
EPHA3	ENSG00000044524	-1.93659	2.78115	5.96663e-05
TRIB3	ENSG00000101255	-1.70111	6.75498	6.30388e-05
EGR2	ENSG00000122877	-1.84078	3.3327	6.75117e-05
GDAP1	ENSG00000104381	-2.095	1.77155	0.000109799
NPPA-AS1	ENSG00000242349	-3.15597	0.116695	0.000154712
SIK1	ENSG00000142178	-1.66032	4.21394	0.000171415
MT2A	ENSG00000125148	-1.55849	6.94471	0.000224944
FAM84B	ENSG00000168672	-1.63507	3.90799	0.000248107
PDPN	ENSG00000162493	-1.658	3.55092	0.000265037
NR4A2	ENSG00000153234	-1.56196	4.82136	0.00032115
SMG1P7	ENSG00000261556	-1.67043	3.07567	0.000346379
AC079921.2	ENSG00000249685	-4.05217	-0.445755	0.000376589
ZSWIM5P3	ENSG00000248958	-2.34295	0.882069	0.000415552
SEC11C	ENSG00000166562	-1.65079	2.94571	0.000491038
EXOSC6	ENSG00000223496	-1.50526	4.4437	0.000580844
RAB3IL1	ENSG00000167994	-1.77479	1.83457	0.000697628
SLC46A3	ENSG00000139508	-1.52077	3.70877	0.000720337
LINC01239	ENSG00000234840	-2.19285	0.905577	0.000759269
LGALS9	ENSG00000168961	-1.72269	2.00168	0.000768323
FLT1	ENSG00000102755	-1.41075	6.81	0.000806548
SYCE1L	ENSG00000205078	-3.20155	-0.334177	0.00108459
AMDHD2	ENSG00000162066	-1.42736	4.03154	0.00121422
TYRP1	ENSG00000107165	-1.83401	1.34861	0.00129563
AL355581.1	ENSG00000227678	-1.7999	1.47517	0.0013415
AC131953.1	ENSG00000250906	-3.81935	-0.628275	0.00136958
CU639417.1	ENSG00000275993	-1.39182	4.23792	0.00145523
TACC2	ENSG00000138162	-1.42397	3.66438	0.00149289
MEST	ENSG00000106484	-1.32281	9.35005	0.00153581
LINC02001	ENSG00000267321	-2.39268	0.157668	0.00159155
ITGA11	ENSG00000137809	-1.31961	7.92068	0.00161253
LINC01963	ENSG00000260804	-1.51825	2.49666	0.00167701
MAMLD1	ENSG00000013619	-1.34727	4.69556	0.00181464
ADGRF4	ENSG00000153294	-1.76703	1.29883	0.00206432
DKK1	ENSG00000107984	-1.28602	8.01364	0.00209447
CPA4	ENSG00000128510	-1.26903	8.9256	0.00235299
HMOX1	ENSG00000100292	-1.28025	6.14982	0.00243018
NR4A3	ENSG00000119508	-1.49041	2.28026	0.00279489
ST6GAL2	ENSG00000144057	-1.40309	2.81169	0.00306215
HSPA9	ENSG00000113013	-1.23662	7.93845	0.00306418
SLC22A15	ENSG00000163393	-1.37563	2.98691	0.00310295
PDCL3	ENSG00000115539	-1.31234	3.6726	0.0032443
LINC01711	ENSG00000268941	-2.64406	-0.2806	0.00338513
NUPR1	ENSG00000176046	-1.22455	7.36726	0.00340815
NUDT14	ENSG00000183828	-1.36361	2.91631	0.00346018
ARMC9	ENSG00000135931	-1.22778	6.07136	0.00359584
IL6	ENSG00000136244	-1.23841	5.33868	0.00360508
SCG2	ENSG00000171951	-1.38327	2.59909	0.00369844
CXCL5	ENSG00000163735	-1.27044	3.97877	0.00382502
CDCA3	ENSG00000111665	-1.46628	2.11551	0.00383797
FAM20A	ENSG00000108950	-1.38157	2.57103	0.00387827
SELPLG	ENSG00000110876	-1.46567	1.86118	0.00412624
RN7SL127P	ENSG00000242175	-6.28391	-1.27638	0.00417417
AC092120.1	ENSG00000261574	-6.28391	-1.27638	0.00417417
AC096586.2	ENSG00000273369	-2.37344	-0.133867	0.00436855
CTH	ENSG00000116761	-1.26006	3.59878	0.00478755
XRCC4	ENSG00000152422	-1.23819	3.96583	0.00482044
CAVIN3	ENSG00000170955	-1.1745	6.53678	0.00509817
UBXN8	ENSG00000104691	-1.38221	2.23758	0.00521711
B9D2	ENSG00000123810	-1.52835	1.47775	0.00565482
SNORD63B	ENSG00000222937	-1.63196	1.11808	0.00592786
SLC25A33	ENSG00000171612	-1.28671	2.81923	0.00630594
AC144831.1	ENSG00000261888	-1.19684	4.06553	0.00635992
DUS3L	ENSG00000141994	-1.20552	3.68077	0.00656926
ZWINT	ENSG00000122952	-1.48527	1.50811	0.00667698
SLC22A3	ENSG00000146477	-1.20317	3.66759	0.0067491
AC087392.5	ENSG00000277491	-6.13397	-1.38245	0.00724341
Y_RNA	ENSG00000200651	-6.13397	-1.38245	0.00724341
STX3	ENSG00000166900	-1.17656	4.02496	0.00732468
TMEM200A	ENSG00000164484	-1.11672	7.90812	0.0073416
SYBU	ENSG00000147642	-1.27614	2.67501	0.00750603
TNFAIP6	ENSG00000123610	-1.39513	1.71568	0.00760196
GFRA1	ENSG00000151892	-1.1689	3.9369	0.00760289
SLC1A3	ENSG00000079215	-1.22321	3.0514	0.00763167
EDA2R	ENSG00000131080	-1.18426	3.65454	0.00771177
KCNE4	ENSG00000152049	-1.10896	7.93542	0.00774672
AC007743.1	ENSG00000233251	-1.26681	2.66851	0.00799435
MT1E	ENSG00000169715	-1.14494	4.53541	0.00808003
FNDC10	ENSG00000228594	-1.25742	2.66199	0.00851457
SERPINB8	ENSG00000166401	-1.14307	4.23276	0.00852954
MFSD1	ENSG00000118855	-1.1026	5.90746	0.00878981
WARS	ENSG00000140105	-1.09119	7.64551	0.00881362
SLC7A11	ENSG00000151012	-1.0915	6.51388	0.00913455
NOC2LP1	ENSG00000213225	-1.44106	1.35227	0.00948574
ANKRD1	ENSG00000148677	-1.28406	2.20261	0.0095518
RRS1	ENSG00000179041	-1.15163	3.59691	0.00963563
AL121772.3	ENSG00000276952	-2.05994	-0.0870277	0.00973269
AL031186.1	ENSG00000237015	-2.05994	-0.0870277	0.00973269
GNG11	ENSG00000127920	-1.1133	4.5504	0.00982365
ADAT3	ENSG00000213638	-1.40347	1.50896	0.0100741
DPYSL4	ENSG00000151640	-1.21514	2.50796	0.0105639
RN7SL2	ENSG00000274012	-1.92219	0.042116	0.0108117
KIF20A	ENSG00000112984	-1.23986	2.35932	0.0108919
GOT1	ENSG00000120053	-1.0844	4.99552	0.0111513
EGR3	ENSG00000179388	-1.13286	3.40731	0.0113932
UBE2C	ENSG00000175063	-1.38244	1.49429	0.0114429
SCRG1	ENSG00000164106	-1.08422	4.45012	0.0117872
LINC02454	ENSG00000256268	-2.17302	-0.278902	0.011803
CTHRC1	ENSG00000164932	-1.04695	8.0794	0.0118031
MIR6772	ENSG00000274816	-2.62101	-0.762483	0.0118324
AP000902.1	ENSG00000266891	-2.62101	-0.762483	0.0118324
UNC5B	ENSG00000107731	-1.05418	6.09355	0.0119846
MSC	ENSG00000178860	-1.11084	3.67232	0.0120428
MCOLN1	ENSG00000090674	-1.07114	4.88715	0.0121872
MMP15	ENSG00000102996	-1.1509	2.9469	0.0124319
ANGPTL1	ENSG00000116194	-1.22322	2.25733	0.0124776
AC100821.2	ENSG00000260955	-5.96661	-1.49704	0.0127308
AC022558.1	ENSG00000259767	-5.96661	-1.49704	0.0127308
SDF2L1	ENSG00000128228	-1.11827	3.30017	0.0131268
AL162742.1	ENSG00000228261	-1.65559	0.371906	0.0131493
AC046185.2	ENSG00000270587	-3.19728	-1.08329	0.0134121
NR4A1	ENSG00000123358	-1.02117	7.20983	0.0142502
LMO7DN-IT1	ENSG00000223458	-2.34129	-0.500429	0.0144854
AC103810.1	ENSG00000264057	-2.34129	-0.500429	0.0144854
EIF4EBP1	ENSG00000187840	-1.01813	6.74178	0.0147504
ADM2	ENSG00000128165	-1.02837	5.47351	0.0148726
MYOZ1	ENSG00000177791	-1.76014	0.1227	0.0153054
PSPH	ENSG00000146733	-1.03861	4.58194	0.0154251
LY96	ENSG00000154589	-1.5284	0.865005	0.0154873
SOX11	ENSG00000176887	-1.0366	4.62542	0.0159555
LINGO2	ENSG00000174482	-1.14988	2.58823	0.0159979
RXFP4	ENSG00000173080	-1.67694	0.235034	0.0160516
ATF5	ENSG00000169136	-1.03702	4.25674	0.0163382
CAMK1D	ENSG00000183049	-1.08458	3.38801	0.0166928
LANCL2	ENSG00000132434	-1.03667	4.22772	0.0167035
DUSP10	ENSG00000143507	-1.01391	4.92615	0.0172569
ZNF195	ENSG00000005801	-1.07251	3.28361	0.017426
U3	ENSG00000221044	-1.92946	-0.178938	0.0180032
SLC38A6	ENSG00000139974	-1.07217	3.18019	0.0182821
ALG1	ENSG00000033011	-1.02487	4.16803	0.0182899
ARSE	ENSG00000157399	-1.13811	2.31895	0.0184245
BMP6	ENSG00000153162	-1.02289	4.03256	0.0189926
ANK2	ENSG00000145362	-1.01174	4.34299	0.0190875
IRX5	ENSG00000176842	-1.07585	2.91476	0.0196754
UCN2	ENSG00000145040	-1.18849	1.99726	0.020497
ADM5	ENSG00000224420	-1.55979	0.305805	0.0210963
LFNG	ENSG00000106003	-1.08098	2.74228	0.0212413
RNU6-301P	ENSG00000207004	-3.06146	-1.17557	0.0215665
SNORA71C	ENSG00000201512	-3.06146	-1.17557	0.0215665
AL080317.1	ENSG00000230177	-1.59531	0.46696	0.0216953
ZSWIM7	ENSG00000214941	-1.09724	2.40176	0.022567
HMGN1P8	ENSG00000241120	-5.77725	-1.62165	0.0226768
MIR3942	ENSG00000265102	-5.77725	-1.62165	0.0226768
AC018521.6	ENSG00000266601	-5.77725	-1.62165	0.0226768
ABHD11-AS1	ENSG00000225969	-2.02205	-0.384523	0.0230709
COL5A1-AS1	ENSG00000204011	-1.25328	1.28656	0.0249226
AC012557.1	ENSG00000271843	-1.73879	-0.0854232	0.0254753
AP000941.1	ENSG00000255176	-1.42354	0.693893	0.0265521
FOXQ1	ENSG00000164379	-1.1821	1.56947	0.0267866
AC112220.4	ENSG00000271643	-1.5511	0.436415	0.0268319
AC211476.1	ENSG00000205584	-2.40083	-0.912952	0.0270427
AL138921.2	ENSG00000236308	-2.40083	-0.912952	0.0270427
AC073896.2	ENSG00000257303	-2.40083	-0.912952	0.0270427
AC007750.1	ENSG00000236841	-1.09093	2.16796	0.0275048
RPGR	ENSG00000156313	-1.02802	2.76808	0.0275765
GBAP1	ENSG00000160766	-1.1366	1.67961	0.028989
AC010319.4	ENSG00000269481	-2.16218	-0.624555	0.0303481
MIR6819	ENSG00000278420	-2.06353	-0.690932	0.0303481
LCP1	ENSG00000136167	-1.02965	2.43433	0.0310344
KRT17	ENSG00000128422	-1.18949	1.30445	0.0321187
AL663070.1	ENSG00000228477	-1.9402	-0.44043	0.0322922
HNRNPA1P59	ENSG00000230280	-1.51424	0.124201	0.0340354
MME-AS1	ENSG00000240666	-1.51424	0.124201	0.0340354
AC009318.3	ENSG00000274315	-2.91151	-1.27425	0.0348666
RGMB-AS1	ENSG00000246763	-1.07701	1.92265	0.0350671
LINC00565	ENSG00000260910	-1.05227	2.1109	0.035256
AC018665.1	ENSG00000279382	-1.09799	1.78193	0.0371901
SULT1E1	ENSG00000109193	-1.11111	1.42037	0.0391281
ARMCX5-GPRASP2	ENSG00000271147	-1.21624	1.06254	0.0396637
FAIM	ENSG00000158234	-1.03247	1.99924	0.0399038
MT1X	ENSG00000187193	-1.41515	0.46829	0.0401014
AL357992.1	ENSG00000236591	-5.55924	-1.7582	0.0409646
RNU6-432P	ENSG00000206923	-5.55924	-1.7582	0.0409646
RNU7-40P	ENSG00000252206	-5.55924	-1.7582	0.0409646
Y_RNA	ENSG00000201071	-5.55924	-1.7582	0.0409646
RNU6-476P	ENSG00000207457	-5.55924	-1.7582	0.0409646
AC097468.3	ENSG00000272644	-2.27671	-0.994607	0.041032
PRRT3-AS1	ENSG00000230082	-2.27671	-0.994607	0.041032
AC106786.2	ENSG00000249996	-2.27671	-0.994607	0.041032
CDCA4P1	ENSG00000229029	-2.27671	-0.994607	0.041032
PET117	ENSG00000232838	-1.40299	0.200505	0.0428142
LRRN3	ENSG00000173114	-1.01655	1.98883	0.0433967
AC026271.1	ENSG00000174977	-1.01655	1.98883	0.0433967
AL954705.1	ENSG00000231181	-1.95764	-0.760561	0.0439913
AC073367.1	ENSG00000225213	-1.95764	-0.760561	0.0439913
AC090673.2	ENSG00000256083	-1.95764	-0.760561	0.0439913
AC073569.3	ENSG00000277130	-1.95764	-0.760561	0.0439913
AC040169.1	ENSG00000260018	-1.95764	-0.760561	0.0439913
AC017074.1	ENSG00000227359	-1.85342	-0.498626	0.0452022
AC019155.1	ENSG00000205898	-1.85342	-0.498626	0.0452022
CYTL1	ENSG00000170891	-1.70855	-0.329009	0.045436
AC131009.3	ENSG00000273568	-1.70855	-0.329009	0.045436
AURKB	ENSG00000178999	-1.20089	0.979363	0.0472123
RPL7AP28	ENSG00000184139	-1.33513	0.52875	0.0475441
